# Supplementary material for: Dual phosphorescent emissions from conformers of iridium complex rotors
Source: Royal Society of Chemistry journal article supplement (doi:10.1039/d4dt02321h), 2024-01-01
Supplement: d4dt02321h1.pdf [file d4dt02321h1.pdf]

## Supporting Information

# Dual phosphorescent emissions from conformers of iridium complex rotors.

Yu-Ting Hsu,<sup>1</sup> Chandni Bhagani,<sup>1</sup> Juan A. Aguilar,<sup>1</sup> Mark A. Fox,<sup>1</sup> Dmitry Yufit,<sup>1</sup> Ross  
Davidson,<sup>1\*</sup> Andrew Beeby.<sup>1\*</sup>

<sup>1</sup>Department of Chemistry, Durham University, South Rd, Durham, DH1 3LE, UK

---

\*To whom correspondence should be addressed. Email: Ross Davidson

(ross.davidson@durham.ac.uk) and Andrew Beeby (andrew.beeby@durham.ac.uk).

## Table of Contents

|                                                         |     |
|---------------------------------------------------------|-----|
| S1. Synthetic details.....                              | S3  |
| S2. Room temperature NMR spectra of new compounds ..... | S7  |
| S3. Crystallography.....                                | S15 |
| S4. Variable temperature NMR spectra.....               | S20 |
| S5. Solvent viscosity data.....                         | S36 |
| S6. Thermodynamic parameter calculations.....           | S37 |
| S7. Cyclic voltammetry .....                            | S40 |
| S8. Photophysics.....                                   | S41 |
| S9. Computations.....                                   | S51 |
| S10. Cartesian coordinates.....                         | S57 |
| S11. References.....                                    | S63 |

## S1. Synthetic details

**General details.** Proton and carbon-13 NMR spectra were recorded in deuterated solvent solutions on either Varian VNMRS-700 or -500 spectrometer and referenced against solvent resonances ( $^1\text{H}$ ,  $\text{CH}_2\text{Cl}_2 = 5.33 \text{ ppm}$ ;  $^{13}\text{C}$ ,  $\text{CD}_2\text{Cl}_2 = 53.4 \text{ ppm}$ ). Proton and carbon-13 NMR peaks were assigned with the aid of 2D  $^1\text{H}$ - $^1\text{H}$  COSY/NOESY and  $^1\text{H}$ - $^{13}\text{C}$  correlation (HSQC and HMBC) NMR spectra.

Atmospheric pressure solids analysis probe (ASAP) ionization mass spectra were obtained using an LCT Premier XE mass spectrometer and an Acquity® UPLC from Waters Ltd at 350°C. Electrospray mass spectra (ES) data were recorded on a TQD mass spectrometer (Waters Ltd, UK) in acetonitrile or MALDI TOF MS data were recorded on a Bruker Autoflex II ToF/ToF. Microanalyses were performed by the Elemental Analysis Service, London Metropolitan University, UK.

The chemicals, 4-(triisopropylsilylethynyl)pyridine (**py-≡-TIPS**),<sup>S1</sup> 4-(trimethylsilylethynyl)pyridine (**py-≡-TMS**),<sup>S2</sup> di- $\mu$ -chlorotetrakis[2-(2-pyridinyl- $\kappa\text{N}$ )phenyl- $\kappa\text{C}$ ]di-iridium [ $\{\text{Ir}(\text{ppy})_2(\mu\text{-Cl})\}_2$ ]<sup>S3</sup> were prepared according to literature methods. Other chemicals used in this study were purchased commercially.

**4-(triethylsilylethynyl)pyridine (py-≡-TES).** Triethylsilylacetylene (1.96 mL, 1.54 g, 11 mmol) was added to a solution containing 4-bromopyridinium chloride (2.00 g, 10.41 mmol),  $\text{PdCl}_2(\text{PPh}_3)_2$  (700 mg, 1 mmol),  $\text{CuI}$  (190 mg, 1 mmol),  $\text{Et}_3\text{N}$  (5 mL) in THF (50 mL) degassed by three freeze-pump-thaw cycles. The solution was heated to reflux for 16 hours before the solvent was removed *in vacuo*. Purification was achieved using silica chromatography, using a solvent gradient from neat DCM to  $\text{DCM}:\text{Et}_2\text{O}$  (8:2), to give a yellow oil. **Yield:** 1.86 g (82%).  **$^1\text{H}$  NMR** (700 MHz;  $\text{CD}_2\text{Cl}_2$ ):  $\delta_{\text{H}}$  8.62 (br, 2H, H2), 7.34 (br, 2H, H3), 1.05 (td,  $^3J_{\text{HH}} = 7.9 \text{ Hz}$ ,  $^4J_{\text{HH}} = 1.1 \text{ Hz}$ , 9H, H<sub>d</sub>), 0.71 (qd,  $^3J_{\text{HH}} = 7.9 \text{ Hz}$ ,  $^4J_{\text{HH}} = 1.1 \text{ Hz}$ , 6H, H<sub>c</sub>) ppm.  **$^{13}\text{C}\{^1\text{H}\}$  NMR** (176 MHz;  $\text{CD}_2\text{Cl}_2$ ):  $\delta_{\text{C}}$  149.6 (C2), 131.0 (C3), 125.9 (C4), 103.2 (C<sup>b</sup>), 97.3 (C<sup>a</sup>), 7.1 (C<sup>d</sup>), 4.1 (C<sup>c</sup>) ppm. **MS(ASAP):**  $m/z$  218.122  $[\text{M}+\text{H}]^+$ .

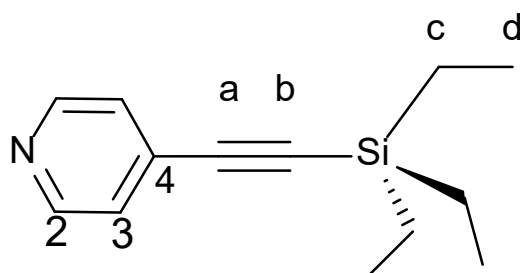

### General synthesis of $\text{Ir}(\text{ppy})_2(\text{pyX})\text{Cl}$ complexes

To a degassed solution of  $\{\text{Ir}(\text{ppy})_2\text{Cl}\}_2$  (200 mg, 0.187 mmol) in anhydrous dichloromethane (30 mL), the alkynyl pyridine (0.410 mmol) was added and the solution was stirred for 1 h at 30 °C. The solvent was removed *in vacuo* to leave a yellow residue. The solid was washed with hexane prior to being

purified on a silica column eluted by DCM to afford a bright yellow solid. Crystals were grown by evaporation of a DCM/MeOH solution.

**Ir(ppy)<sub>2</sub>(py≡-TIPS)Cl (1).** Yield: 246 mg (83%). <sup>1</sup>H NMR (700 MHz; CD<sub>2</sub>Cl<sub>2</sub>, 25°C): δ<sub>H</sub> 9.85 (d, <sup>3</sup>J<sub>HH</sub> = 5.7 Hz, 1H, H<sup>B6</sup>), 8.92 (v.br., FWHH = 400 Hz, 2H, H<sup>E2/E2'</sup>), 8.11 (d, <sup>3</sup>J<sub>HH</sub> = 5.6 Hz, 1H, H<sup>D6</sup>), 7.95 (d, <sup>3</sup>J<sub>HH</sub> = 8.1 Hz, 1H, H<sup>D3</sup>), 7.80 (ddd, <sup>3</sup>J<sub>HH</sub> = 7.3 Hz, <sup>3</sup>J<sub>HH</sub> = 5.7 Hz, <sup>4</sup>J<sub>HH</sub> = 1.6 Hz, 1H, H<sup>D4</sup>), 7.79 (d, 1H, H<sup>B3</sup>), 7.74 (ddd, <sup>3</sup>J<sub>HH</sub> = 7.3 Hz, <sup>3</sup>J<sub>HH</sub> = 5.7 Hz, <sup>4</sup>J<sub>HH</sub> = 1.6 Hz, 1H, H<sup>B4</sup>), 7.62 (dd, <sup>3</sup>J<sub>HH</sub> = 7.8 Hz, <sup>4</sup>J<sub>HH</sub> = 1.3 Hz, 1H, H<sup>C3</sup>), 7.56 (dd, <sup>3</sup>J<sub>HH</sub> = 7.8 Hz, <sup>4</sup>J<sub>HH</sub> = 1.3 Hz, 1H, H<sup>A3</sup>), 7.25 (ddd, <sup>3</sup>J<sub>HH</sub> = 7.4 Hz, <sup>3</sup>J<sub>HH</sub> = 5.8 Hz, <sup>4</sup>J<sub>HH</sub> = 1.6 Hz, 1H, H<sup>B5</sup>), 7.24 (br, FWHH = 16 Hz, 2H, H<sup>E3/E3'</sup>), 7.09 (ddd, <sup>3</sup>J<sub>HH</sub> = 7.3 Hz, <sup>3</sup>J<sub>HH</sub> = 5.7 Hz, <sup>4</sup>J<sub>HH</sub> = 1.4 Hz, 1H, H<sup>D5</sup>), 6.91 (td, <sup>3</sup>J<sub>HH</sub> = 7.4 Hz, <sup>4</sup>J<sub>HH</sub> = 1.4 Hz, 1H, H<sup>A4</sup>), 6.86 (td, <sup>3</sup>J<sub>HH</sub> = 7.4 Hz, <sup>4</sup>J<sub>HH</sub> = 1.4 Hz, 1H, H<sup>C4</sup>), 6.81 (td, <sup>3</sup>J<sub>HH</sub> = 7.4 Hz, <sup>4</sup>J<sub>HH</sub> = 1.3 Hz, 1H, H<sup>A5</sup>), 6.75 (td, <sup>3</sup>J<sub>HH</sub> = 7.4 Hz, <sup>4</sup>J<sub>HH</sub> = 1.3 Hz, 1H, H<sup>C5</sup>), 6.34 (dd, <sup>3</sup>J<sub>HH</sub> = 7.7 Hz, <sup>4</sup>J<sub>HH</sub> = 1.4 Hz, 1H, H<sup>A6</sup>), 6.18 (dd, <sup>3</sup>J<sub>HH</sub> = 7.6 Hz, <sup>4</sup>J<sub>HH</sub> = 1.5 Hz, 1H, H<sup>C6</sup>), 1.11 (pseudo singlet, 21H, H<sup>c</sup>+H<sup>d</sup>) ppm. <sup>13</sup>C{<sup>1</sup>H} NMR (176 MHz; CD<sub>2</sub>Cl<sub>2</sub>, 25°C): δ<sub>C</sub> 168.2 (C<sup>D2</sup>), 167.7 (C<sup>B2</sup>), 151.3 (br, FWHH = 12 Hz, C<sup>E2</sup> + C<sup>E2'</sup>), 150.8 (C<sup>B6</sup>), 150.5 (C<sup>A1</sup>), 149.0 (C<sup>D6</sup>), 148.4 (C<sup>C1</sup>), 144.1 (C<sup>C2</sup> + C<sup>A2</sup>), 137.1 (C<sup>B4</sup>), 136.8 (C<sup>D4</sup>), 132.2 (C<sup>E4</sup>), 132.0 (C<sup>C6</sup>), 131.3 (C<sup>A6</sup>), 130.1 (C<sup>A5</sup>), 129.1 (C<sup>C5</sup>), 127.4 (br, FWHH = 3 Hz, C<sup>E3</sup> + C<sup>E3'</sup>), 124.2 (C<sup>A3</sup>), 123.7 (C<sup>C3</sup>), 122.4 (C<sup>B5</sup>), 122.0 (C<sup>D5</sup>), 121.2 (C<sup>A4</sup>), 121.1 (C<sup>C4</sup>), 119.1 (C<sup>D3</sup>), 118.4 (C<sup>B3</sup>), 103.2 (C<sup>b</sup>), 100.2 (C<sup>a</sup>), 18.3 (C<sup>d</sup>), 11.1 (C<sup>c</sup>) ppm. HRMS (ES+): m/z 760.2719 [M-Cl]<sup>+</sup>. Anal. Calc. for C<sub>38</sub>H<sub>41</sub>ClIrN<sub>3</sub>Si: C, 57.37; H, 5.20; N, 5.28 %. Found: C, 57.19; H, 5.30; N, 5.37 %.

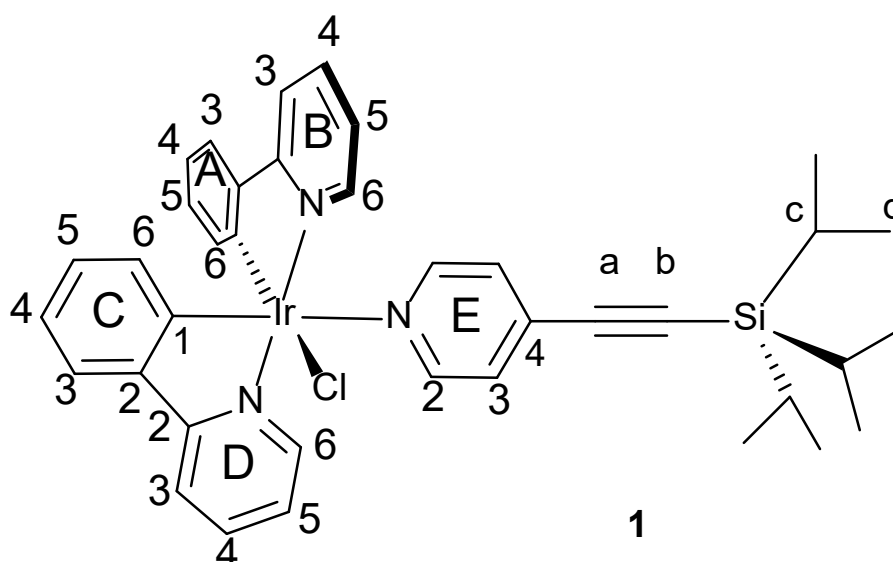

**Ir(ppy)<sub>2</sub>(py≡-TES)Cl (2).** Yield: 89 mg (32%). <sup>1</sup>H NMR (700 MHz; CD<sub>2</sub>Cl<sub>2</sub>, 25°C): δ<sub>H</sub> 9.83 (d, <sup>3</sup>J<sub>HH</sub> = 5.5 Hz, 1H, H<sup>B6</sup>), 8.92 (v.br., FWHH = 500 Hz, 2H, H<sup>E2/E2'</sup>), 8.09 (d, <sup>3</sup>J<sub>HH</sub> = 5.6 Hz, 1H, H<sup>D6</sup>), 7.94 (d, <sup>3</sup>J<sub>HH</sub> = 8.2 Hz, 1H, H<sup>D3</sup>), 7.80 (ddd, <sup>3</sup>J<sub>HH</sub> = 7.3 Hz, <sup>3</sup>J<sub>HH</sub> = 5.7 Hz, <sup>4</sup>J<sub>HH</sub> = 1.6 Hz, 1H, H<sup>D4</sup>), 7.79 (d,

1H, H<sup>B3</sup>), 7.73 (ddd, <sup>3</sup>J<sub>HH</sub> = 7.3 Hz, <sup>3</sup>J<sub>HH</sub> = 5.7 Hz, <sup>4</sup>J<sub>HH</sub> = 1.6 Hz, 1H, H<sup>B4</sup>), 7.61 (d, <sup>3</sup>J<sub>HH</sub> = 7.7 Hz, 1H, H<sup>C3</sup>), 7.55 (d, <sup>3</sup>J<sub>HH</sub> = 7.7 Hz, 1H, H<sup>A3</sup>), 7.24 (ddd, <sup>3</sup>J<sub>HH</sub> = 7.4 Hz, <sup>3</sup>J<sub>HH</sub> = 5.8 Hz, <sup>4</sup>J<sub>HH</sub> = 1.6 Hz, 1H, H<sup>B5</sup>), 7.22 (br, FWHH = 16 Hz, 2H, H<sup>E3/E3'</sup>), 7.08 (ddd, <sup>3</sup>J<sub>HH</sub> = 7.3 Hz, <sup>3</sup>J<sub>HH</sub> = 5.7 Hz, <sup>4</sup>J<sub>HH</sub> = 1.4 Hz, 1H, H<sup>D5</sup>), 6.90 (td, <sup>3</sup>J<sub>HH</sub> = 7.5 Hz, <sup>4</sup>J<sub>HH</sub> = 1.2 Hz, 1H, H<sup>A4</sup>), 6.85 (td, <sup>3</sup>J<sub>HH</sub> = 7.4 Hz, <sup>4</sup>J<sub>HH</sub> = 1.2 Hz, 1H, H<sup>C4</sup>), 6.80 (td, <sup>3</sup>J<sub>HH</sub> = 7.4 Hz, <sup>4</sup>J<sub>HH</sub> = 1.4 Hz, 1H, H<sup>A5</sup>), 6.74 (td, <sup>3</sup>J<sub>HH</sub> = 7.4 Hz, <sup>4</sup>J<sub>HH</sub> = 1.3 Hz, 1H, H<sup>C5</sup>), 6.33 (dd, <sup>3</sup>J<sub>HH</sub> = 7.8 Hz, <sup>4</sup>J<sub>HH</sub> = 1.2 Hz, 1H, H<sup>A6</sup>), 6.16 (dd, <sup>3</sup>J<sub>HH</sub> = 7.8 Hz, <sup>4</sup>J<sub>HH</sub> = 1.2 Hz, 1H, H<sup>C6</sup>), 1.01 (t, <sup>3</sup>J<sub>HH</sub> = 7.9 Hz, 9H, H<sub>c</sub>), 0.67 (q, <sup>3</sup>J<sub>HH</sub> = 7.9 Hz, 6H, H<sub>d</sub>) ppm. <sup>13</sup>C{<sup>1</sup>H} NMR (176 MHz; CD<sub>2</sub>Cl<sub>2</sub>, 25°C): δ<sub>C</sub> 168.1 (C<sup>D2</sup>), 167.7 (C<sup>B2</sup>), 151.3 (br, FWHH = 17 Hz, C<sup>E2</sup> + C<sup>E2'</sup>), 150.8 (C<sup>B6</sup>), 150.4 (C<sup>A1</sup>), 149.0 (C<sup>D6</sup>), 148.3 (C<sup>C1</sup>), 144.1 (C<sup>C2</sup> + C<sup>A2</sup>), 137.1 (C<sup>B4</sup>), 136.8 (C<sup>D4</sup>), 132.1 (C<sup>E4</sup>), 132.0 (C<sup>C6</sup>), 131.3 (C<sup>A6</sup>), 130.1 (C<sup>A5</sup>), 129.1 (C<sup>C5</sup>), 127.4 (br, FWHH = 3 Hz, C<sup>E3</sup> + C<sup>E3'</sup>), 124.2 (C<sup>A3</sup>), 123.7 (C<sup>C3</sup>), 122.4 (C<sup>B5</sup>), 122.0 (C<sup>D5</sup>), 121.2 (C<sup>A4</sup>), 121.1 (C<sup>C4</sup>), 119.1 (C<sup>D3</sup>), 118.4 (C<sup>B3</sup>), 102.3 (C<sup>b</sup>), 101.0 (C<sup>a</sup>), 7.1 (C<sup>d</sup>), 4.0 (C<sup>c</sup>) ppm. **MS(MALDI)**: m/z 751.2 [M]<sup>+</sup>, 536.0 [M-pyCCTES]<sup>+</sup>, 718.4 [M-Cl]<sup>+</sup>. **Anal. Calc.** for C<sub>35</sub>H<sub>35</sub>ClIrN<sub>3</sub>Si: C, 55.80; H, 4.68; N, 5.58 %. **Found**: C, 55.65; H, 4.65; N, 5.54 %.

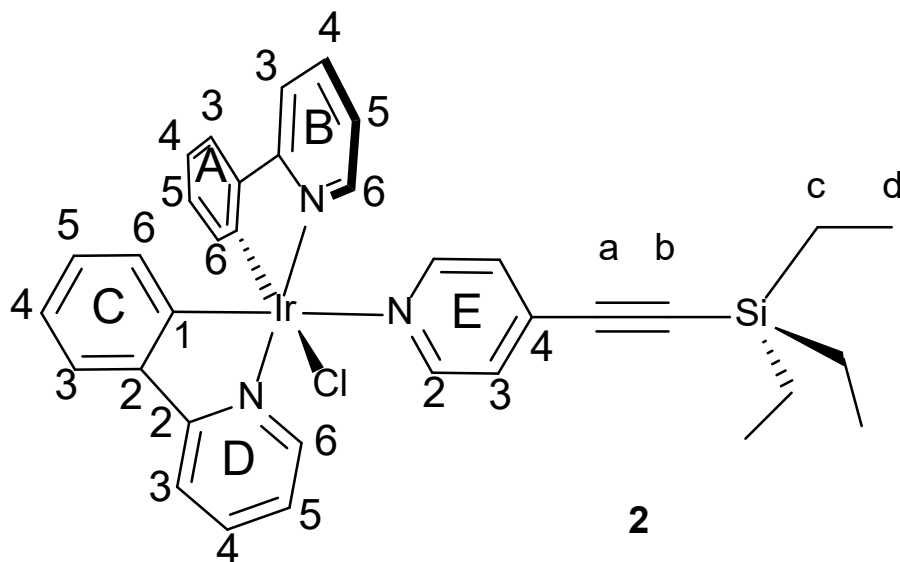

**Ir(ppy)<sub>2</sub>(py≡-TMS)Cl (3).** **Yield:** 60 mg (23%). <sup>1</sup>H NMR (700 MHz; CD<sub>2</sub>Cl<sub>2</sub>, 25°C): δ<sub>H</sub> 9.83 (d, <sup>3</sup>J<sub>HH</sub> = 5.8 Hz, 1H, H<sup>B6</sup>), 8.92 (v.br., FWHH = 300 Hz, 2H, H<sup>E2/E2'</sup>), 8.08 (d, <sup>3</sup>J<sub>HH</sub> = 5.8 Hz, H<sup>D6</sup>), 7.94 (d, <sup>3</sup>J<sub>HH</sub> = 8.2 Hz, 1H, H<sup>D3</sup>), 7.80 (ddd, <sup>3</sup>J<sub>HH</sub> = 7.3 Hz, <sup>3</sup>J<sub>HH</sub> = 5.7 Hz, <sup>4</sup>J<sub>HH</sub> = 1.6 Hz, 1H, H<sup>D4</sup>), 7.79 (d, 1H, H<sup>B3</sup>), 7.73 (ddd, <sup>3</sup>J<sub>HH</sub> = 7.3 Hz, <sup>3</sup>J<sub>HH</sub> = 5.7 Hz, <sup>4</sup>J<sub>HH</sub> = 1.6 Hz, 1H, H<sup>B4</sup>), 7.61 (d, <sup>3</sup>J<sub>HH</sub> = 7.9 Hz, 1H, H<sup>C3</sup>), 7.55 (d, <sup>3</sup>J<sub>HH</sub> = 7.7 Hz, 1H, H<sup>A3</sup>), 7.24 (ddd, <sup>3</sup>J<sub>HH</sub> = 7.4 Hz, <sup>3</sup>J<sub>HH</sub> = 5.8 Hz, <sup>4</sup>J<sub>HH</sub> = 1.6 Hz, 1H, H<sup>B5</sup>), 7.21 (br, FWHH = 16 Hz, 2H, H<sup>E3/E3'</sup>), 7.08 (ddd, <sup>3</sup>J<sub>HH</sub> = 7.3 Hz, <sup>3</sup>J<sub>HH</sub> = 5.7 Hz, <sup>4</sup>J<sub>HH</sub> = 1.5 Hz, 1H, H<sup>D5</sup>), 6.90 (td, <sup>3</sup>J<sub>HH</sub> = 7.5 Hz, <sup>4</sup>J<sub>HH</sub> = 2.0 Hz, 1H, H<sup>A4</sup>), 6.85 (td, <sup>3</sup>J<sub>HH</sub> = 7.5 Hz, <sup>4</sup>J<sub>HH</sub> = 2.0 Hz, 1H, H<sup>C4</sup>), 6.80 (td, <sup>3</sup>J<sub>HH</sub> = 7.5 Hz, <sup>4</sup>J<sub>HH</sub> = 2.0 Hz, 1H, H<sup>A5</sup>), 6.74 (td, <sup>3</sup>J<sub>HH</sub> = 7.5 Hz, <sup>4</sup>J<sub>HH</sub> = 2.0 Hz, 1H, H<sup>C5</sup>), 6.33 (d, <sup>3</sup>J<sub>HH</sub> = 7.6 Hz, 1H, H<sup>A6</sup>), 6.16 (d, <sup>3</sup>J<sub>HH</sub> = 7.7 Hz, 1H, H<sup>C6</sup>), 0.23 (s, 9H, H<sup>c</sup>) ppm. <sup>13</sup>C{<sup>1</sup>H} NMR (176 MHz; CD<sub>2</sub>Cl<sub>2</sub>,

25°C):  $\delta_c$  168.1 (C<sup>D2</sup>), 167.7 (C<sup>B2</sup>), 151.3 (br, FWHH = 16 Hz, C<sup>E2</sup> + C<sup>E2'</sup>), 150.8 (C<sup>B6</sup>), 150.4 (C<sup>A1</sup>), 149.0 (C<sup>D6</sup>), 148.3 (C<sup>C1</sup>), 144.1 (C<sup>C2</sup> + C<sup>A2</sup>), 137.1 (C<sup>B4</sup>), 136.8 (C<sup>D4</sup>), 132.1 (C<sup>E4</sup>), 132.0 (C<sup>C6</sup>), 131.3 (C<sup>A6</sup>), 130.1 (C<sup>A5</sup>), 129.1 (C<sup>C5</sup>), 127.3 (br, FWHH = 3 Hz, C<sup>E3</sup> + C<sup>E3'</sup>), 124.2 (C<sup>A3</sup>), 123.7 (C<sup>C3</sup>), 122.4 (C<sup>B5</sup>), 122.0 (C<sup>D5</sup>), 121.2 (C<sup>A4</sup>), 121.1 (C<sup>C4</sup>), 119.1 (C<sup>D3</sup>), 118.3 (C<sup>B3</sup>), 103.1 (C<sup>b</sup>), 100.8 (C<sup>a</sup>), -0.89 (C<sup>c</sup>) ppm. **MS(MALDI):** m/z 710.0 [M]<sup>+</sup>, 536.0 [M-pyCCTMS]<sup>+</sup>. **Anal. Calc.** for C<sub>32</sub>H<sub>29</sub>ClIrN<sub>3</sub>Si·¼CH<sub>2</sub>Cl<sub>2</sub>: C, 52.87; H, 4.06; N, 5.74 %. **Found:** C, 52.85; H, 4.14; N, 5.54 %.

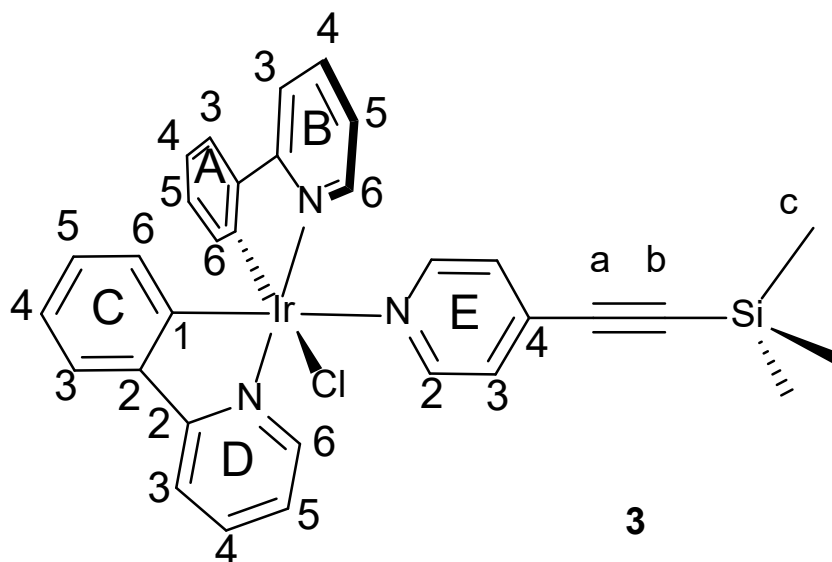

## S2. Room temperature NMR spectra of new compounds

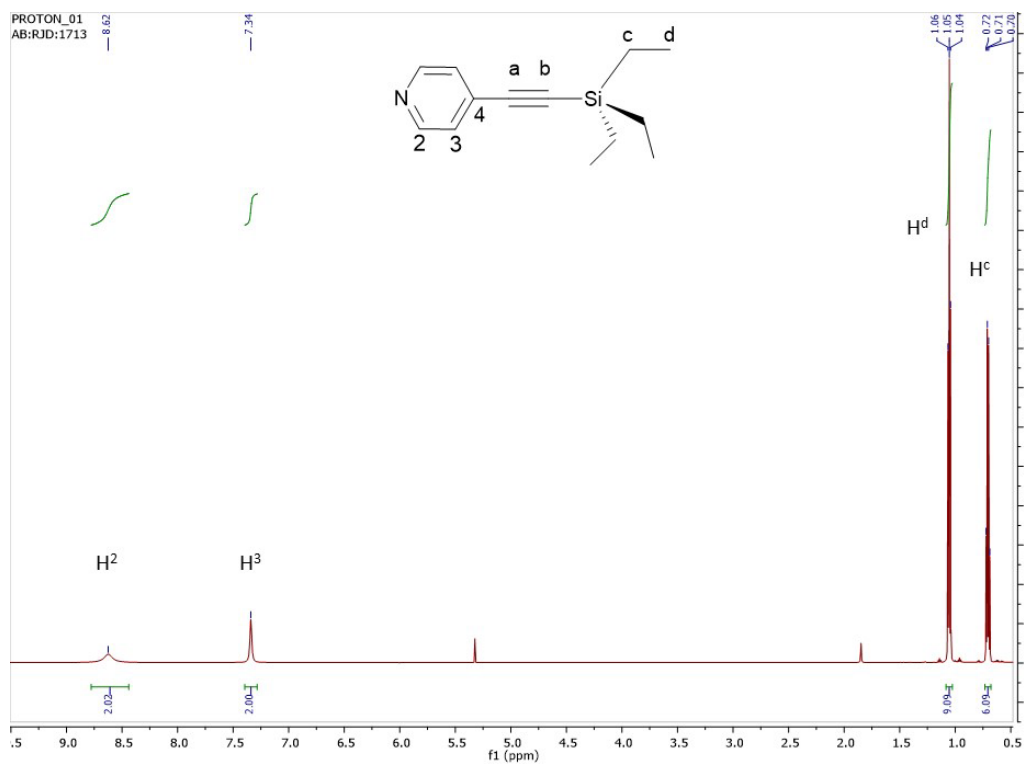

Figure S1.  $^1\text{H}$  NMR spectrum of  $\text{py}\equiv\text{-TES}$ , recorded in  $\text{CD}_2\text{Cl}_2$  at  $25^\circ\text{C}$ .

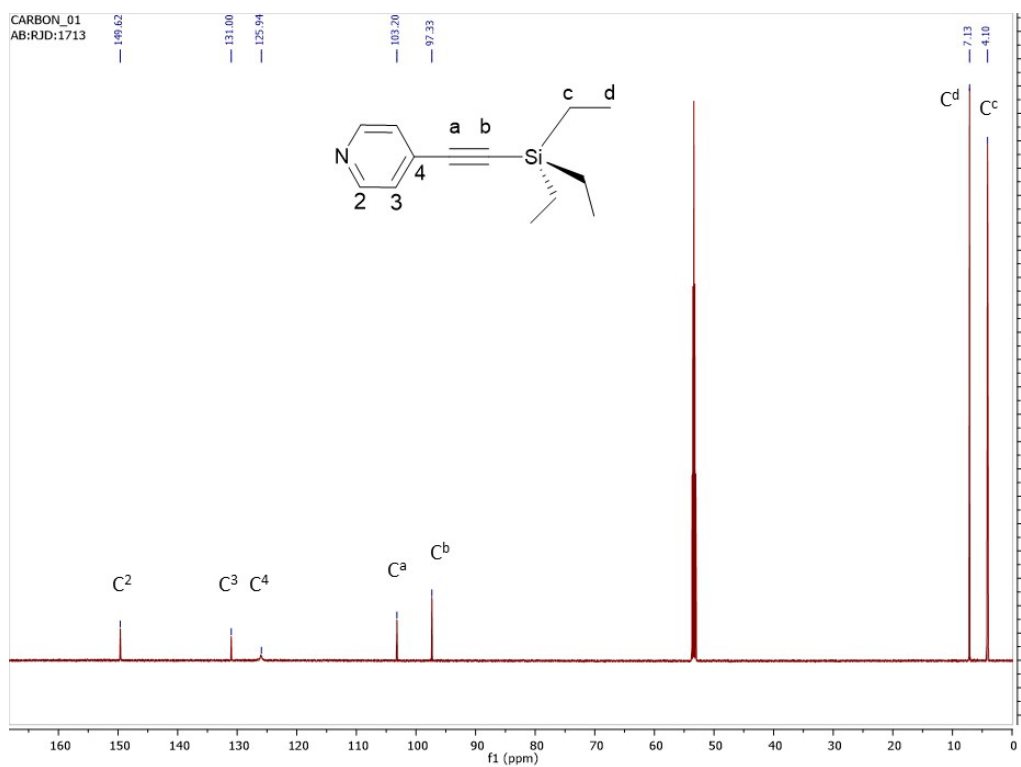

Figure S2.  $^{13}\text{C}\{^1\text{H}\}$  NMR spectrum of  $\text{py}\equiv\text{-TES}$ , recorded in  $\text{CD}_2\text{Cl}_2$  at  $25^\circ\text{C}$ .

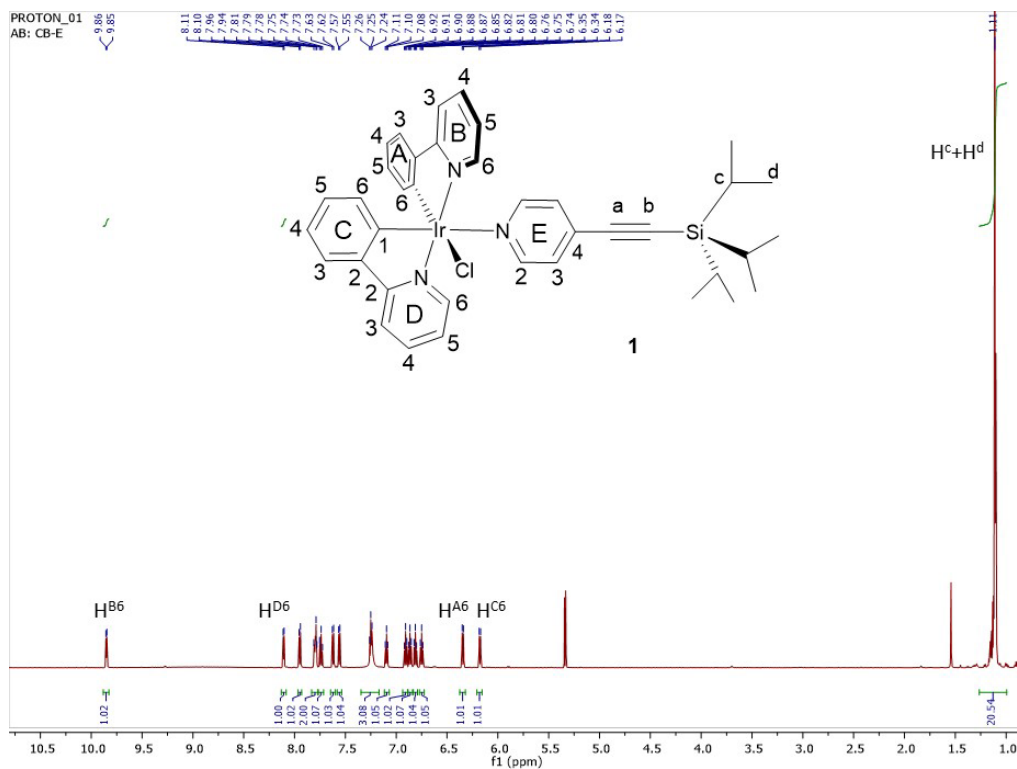

Figure S3a.  $^1\text{H}$  NMR spectrum of **1**, recorded in  $\text{CD}_2\text{Cl}_2$  at  $25^\circ\text{C}$ .

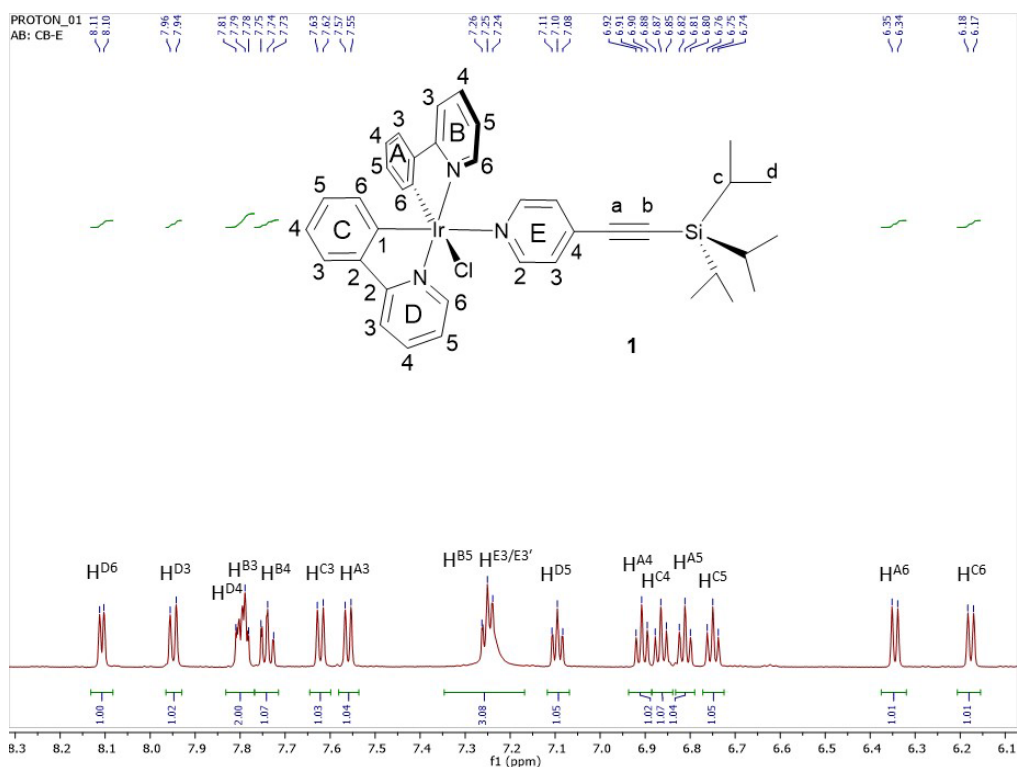

Figure S3b.  $^1\text{H}$  NMR spectrum of **1**, recorded in  $\text{CD}_2\text{Cl}_2$  at  $25^\circ\text{C}$ .



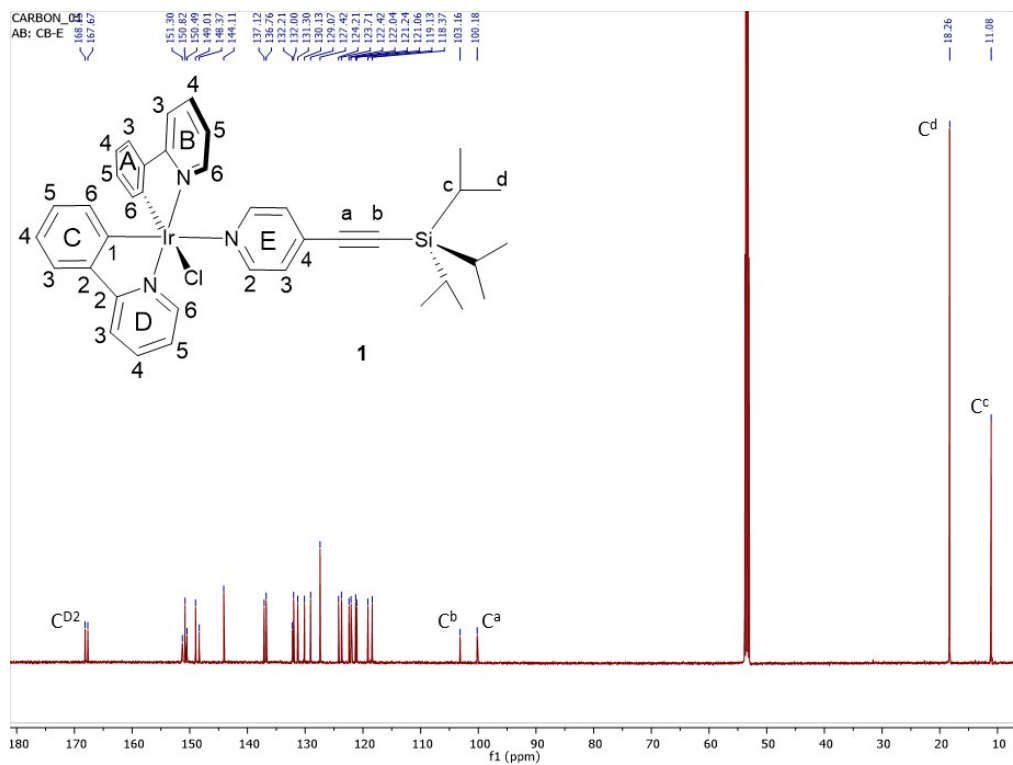

**Figure S4a.**  $^{13}\text{C}\{^1\text{H}\}$  NMR spectrum of **1**, recorded in  $\text{CD}_2\text{Cl}_2$  at  $25^\circ\text{C}$ .

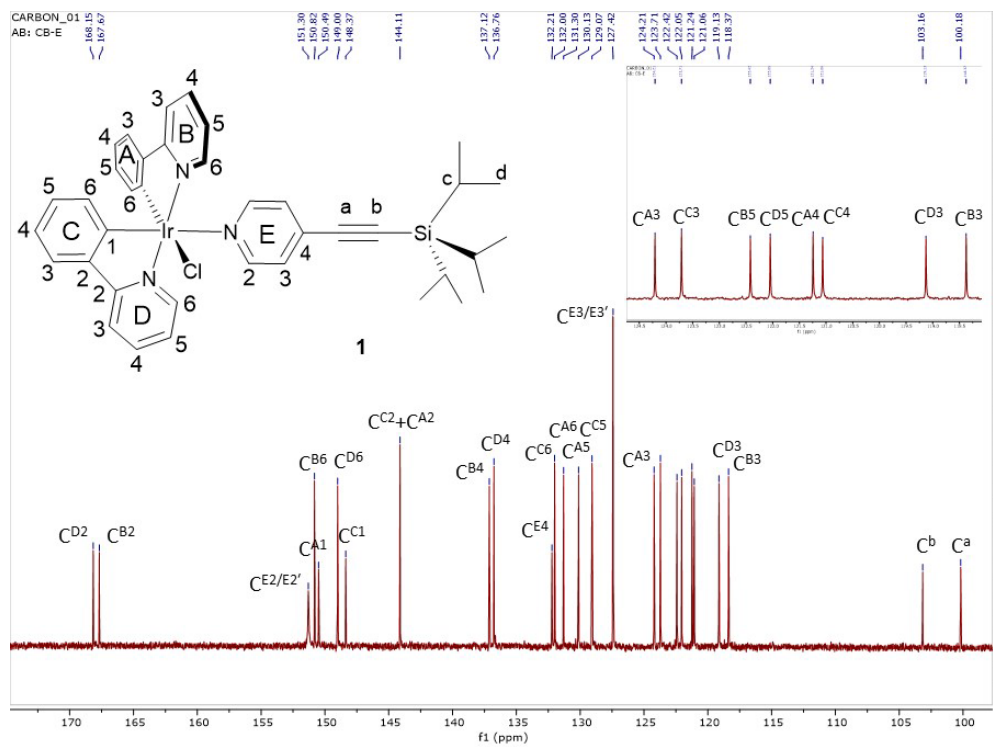

**Figure S4b.**  $^{13}\text{C}\{^1\text{H}\}$  NMR spectrum of **1**, recorded in  $\text{CD}_2\text{Cl}_2$  at  $25^\circ\text{C}$ .

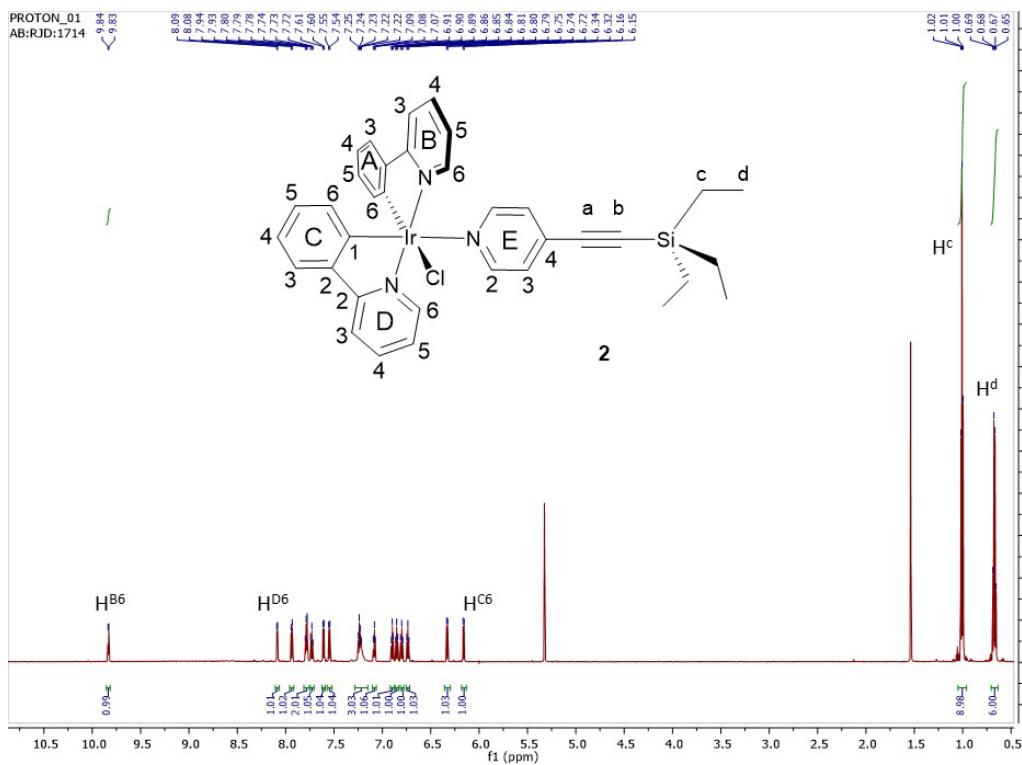

**Figure S5a.**  $^1\text{H}$  NMR spectrum of **2**, recorded in  $\text{CD}_2\text{Cl}_2$  at  $25^\circ\text{C}$ .

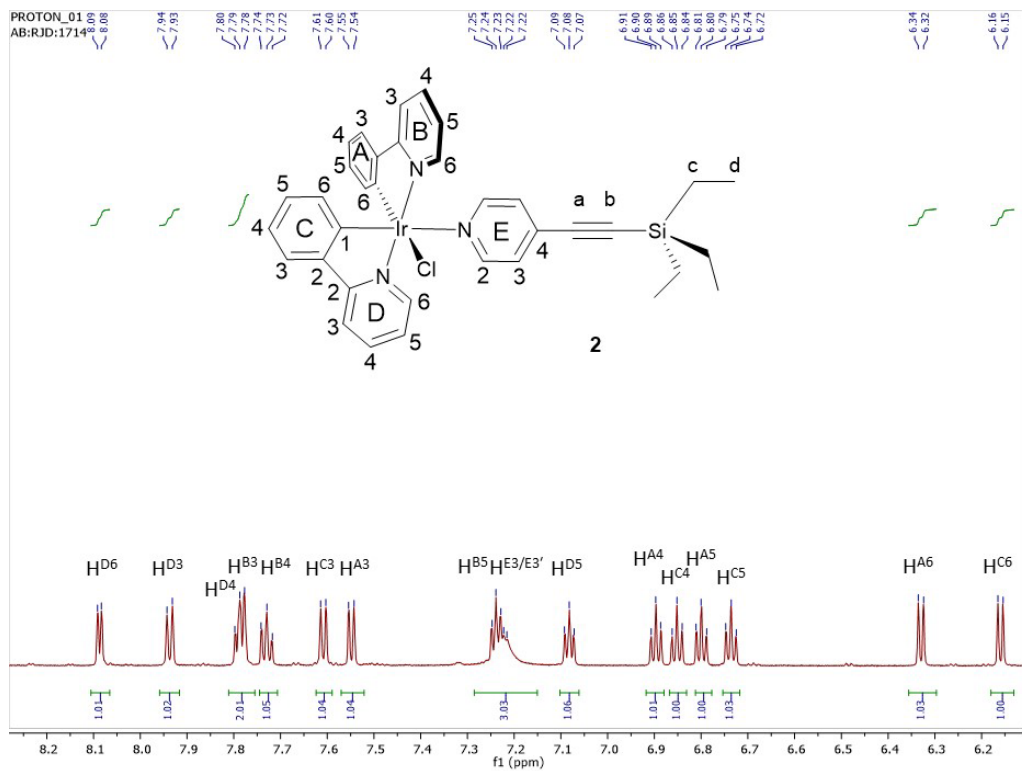

**Figure S5b.**  $^1\text{H}$  NMR spectrum of **2**, recorded in  $\text{CD}_2\text{Cl}_2$  at  $25^\circ\text{C}$ .

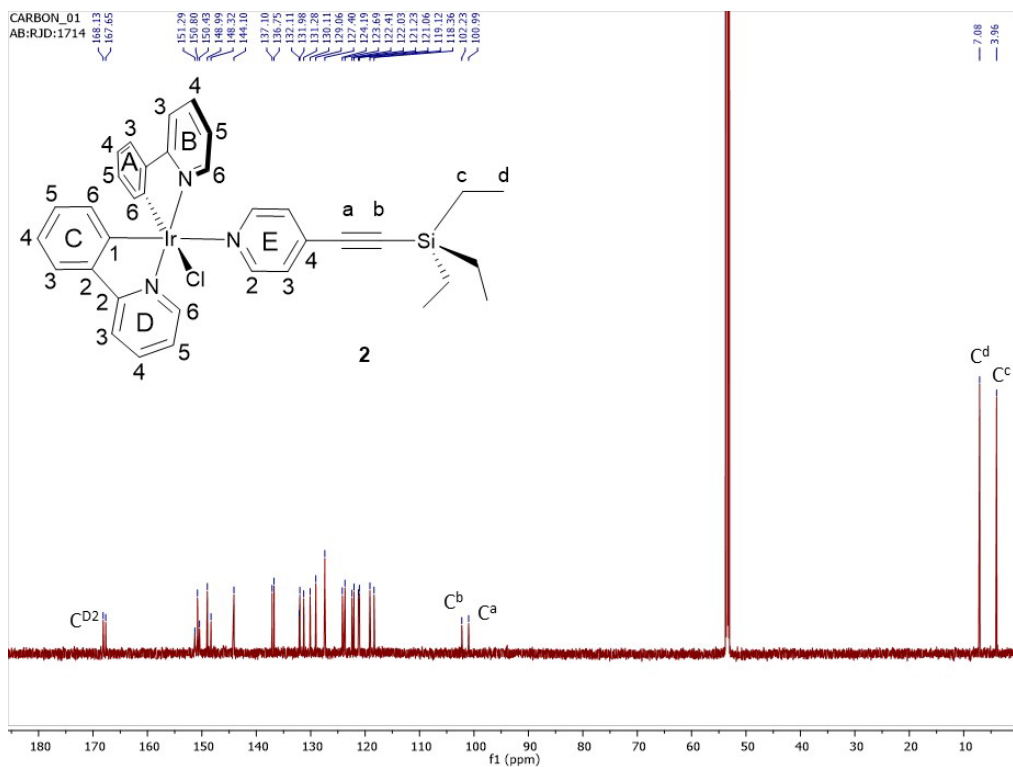

Figure S6a.  $^{13}\text{C}\{^1\text{H}\}$  NMR spectrum of **2**, recorded in  $\text{CD}_2\text{Cl}_2$  at  $25^\circ\text{C}$ .

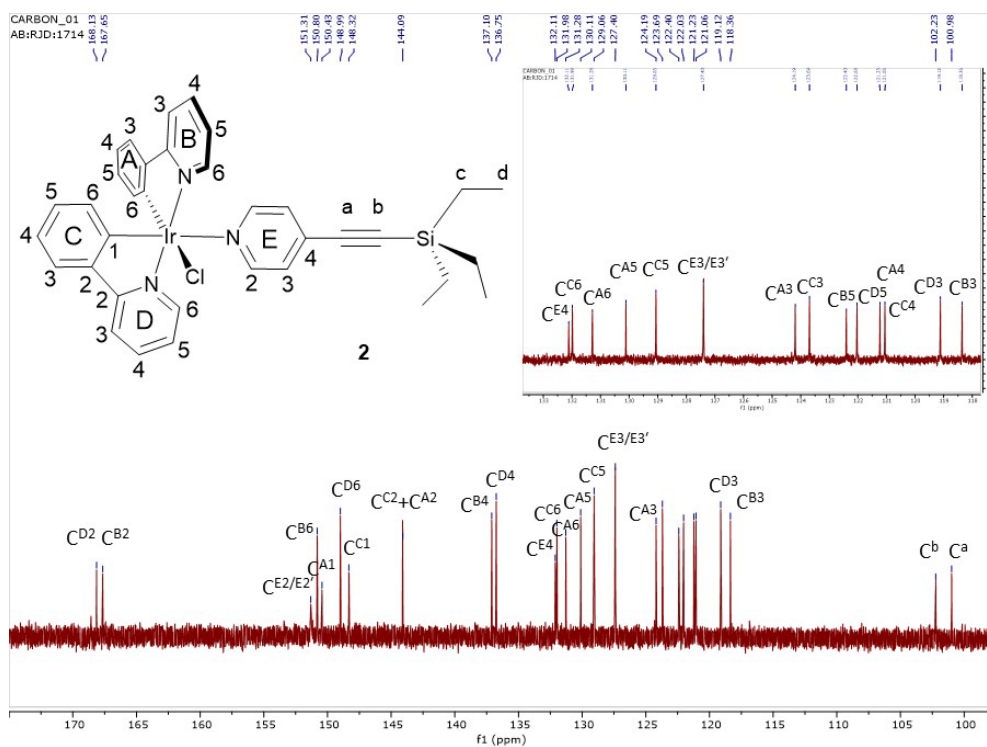

Figure S6b.  $^{13}\text{C}\{^1\text{H}\}$  NMR spectrum of **2**, recorded in  $\text{CD}_2\text{Cl}_2$  at  $25^\circ\text{C}$ .

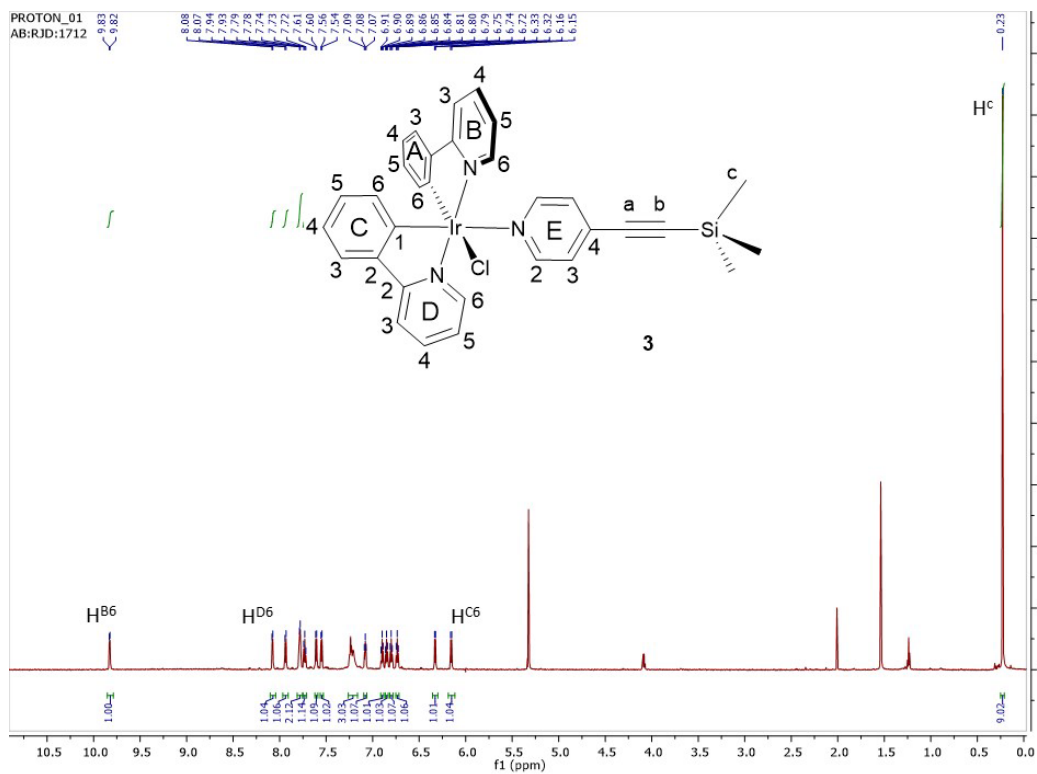

Figure S7a.  $^1\text{H}$  NMR spectrum of **3**, recorded in  $\text{CD}_2\text{Cl}_2$  at  $25^\circ\text{C}$ .

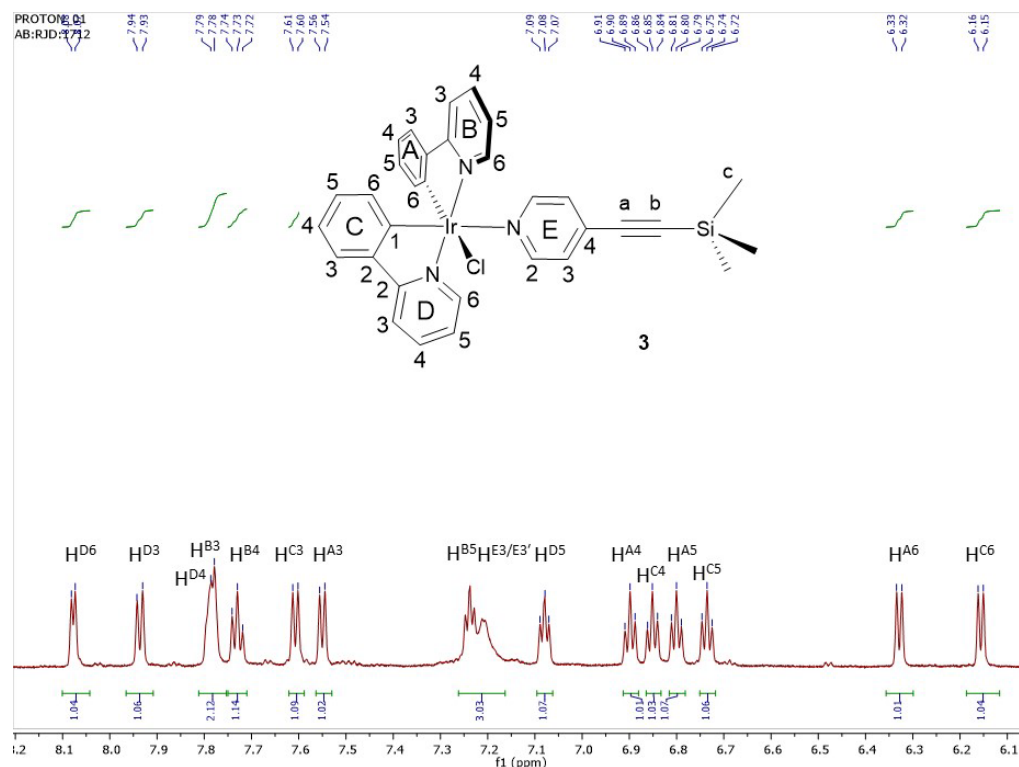

Figure S7b.  $^1\text{H}$  NMR spectrum of **3**, recorded in  $\text{CD}_2\text{Cl}_2$  at  $25^\circ\text{C}$ .

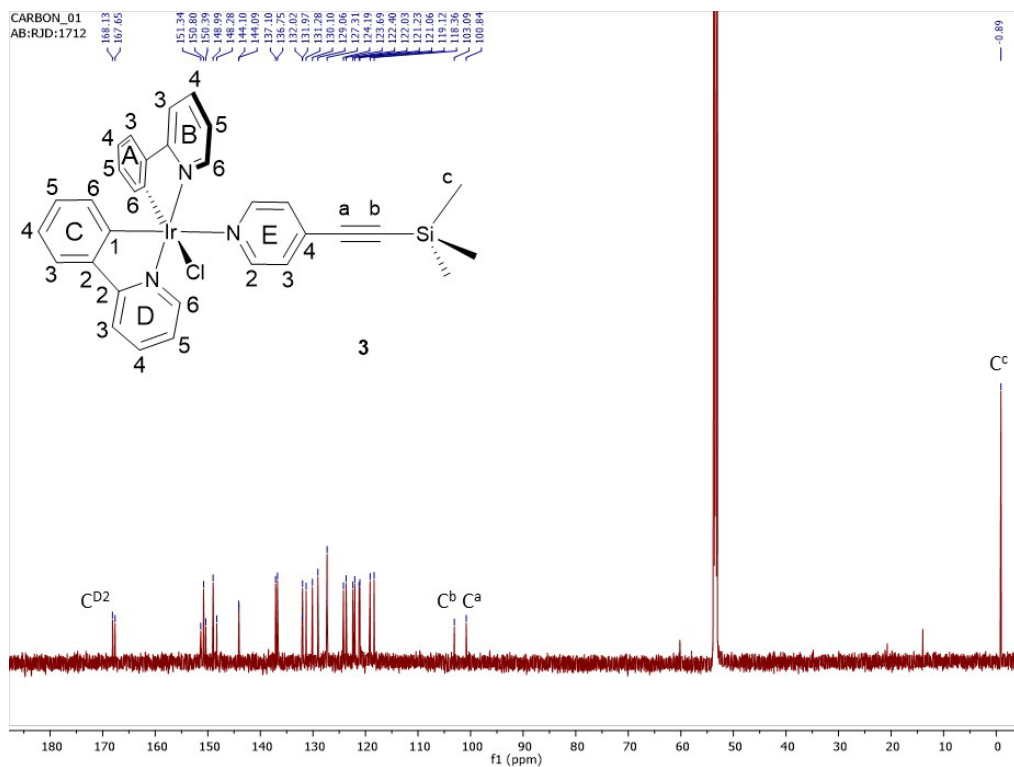

Figure S8a.  $^{13}\text{C}\{^1\text{H}\}$  NMR spectrum of **3**, recorded in  $\text{CD}_2\text{Cl}_2$  at  $25^\circ\text{C}$ .

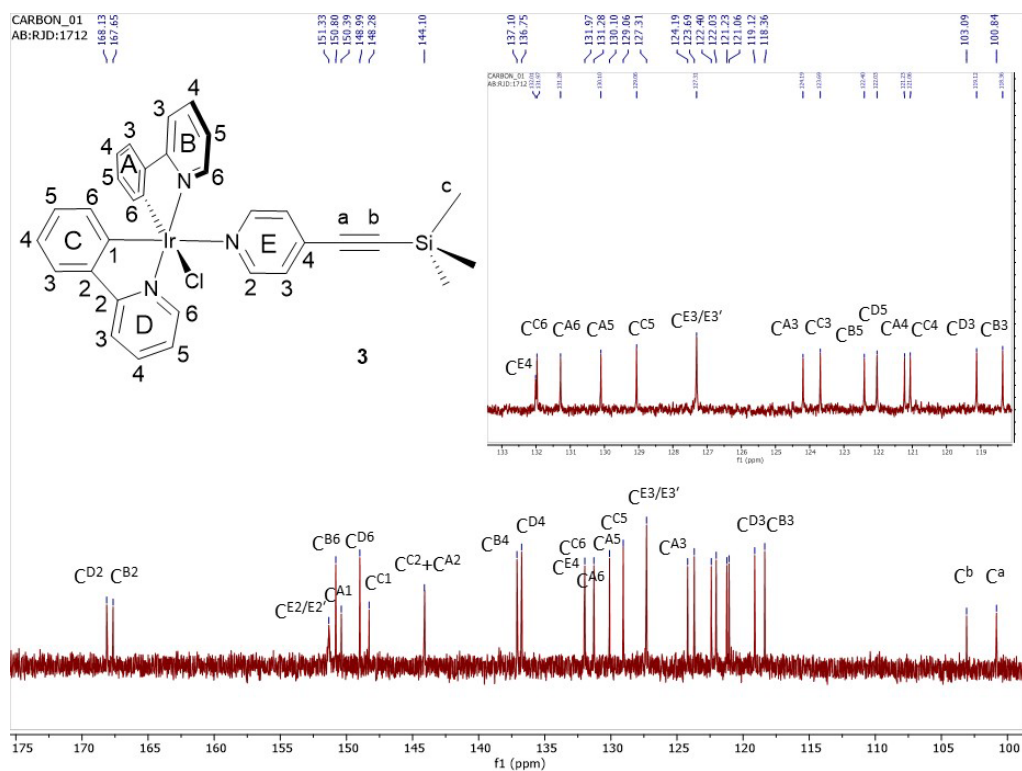

Figure S8b.  $^{13}\text{C}\{^1\text{H}\}$  NMR spectrum of **3**, recorded in  $\text{CD}_2\text{Cl}_2$  at  $25^\circ\text{C}$ .

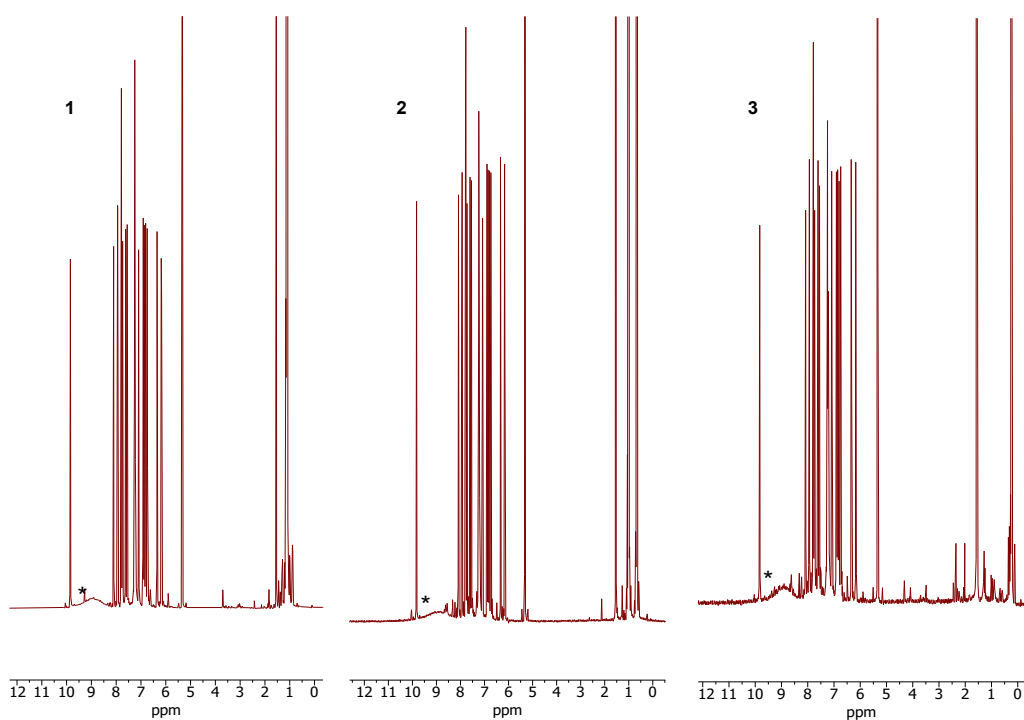

**Figure S9.** Broad peaks labelled as \* are observed in  $^1\text{H}$  spectra for protons at E2/E2' positions of iridium complexes **1-3**, recorded in  $\text{CD}_2\text{Cl}_2$  at  $25^\circ\text{C}$ .

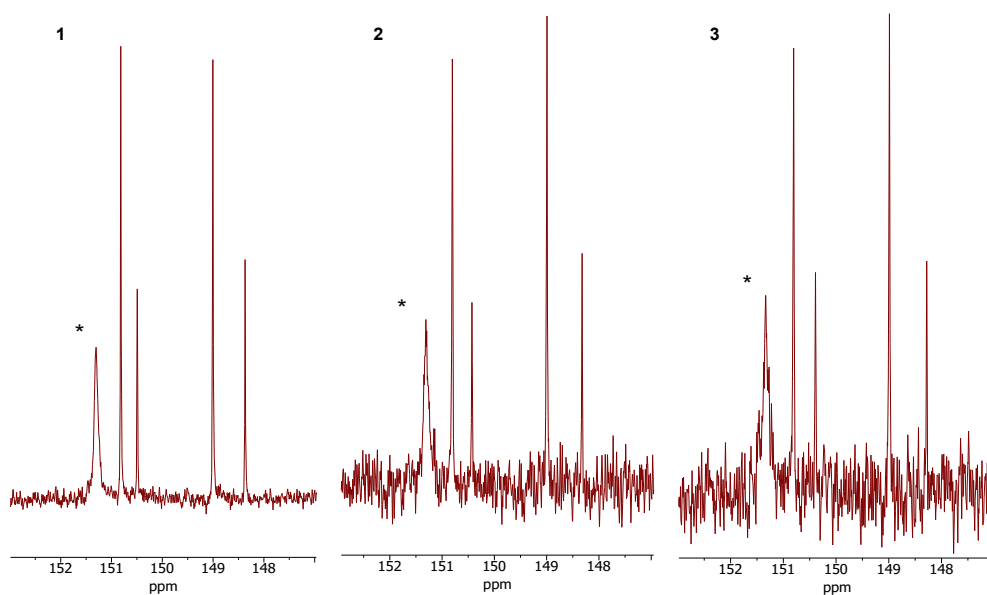

**Figure S10.** Broad peaks labelled as \* are observed in  $^{13}\text{C}\{^1\text{H}\}$  spectra for carbons at E2/E2' positions of iridium complexes **1-3**, recorded in  $\text{CD}_2\text{Cl}_2$  at  $25^\circ\text{C}$ .

### S3. Crystallographic data

The X-ray single crystal data for compound **1** have been collected at 120.0(1)K using  $\lambda$ MoK $\alpha$  radiation ( $\lambda = 0.71073\text{\AA}$ ) on a Bruker D8Venture (Photon100 CMOS detector, I $\mu$ S-microsource, focusing mirrors) diffractometer equipped with a Cryostream (Oxford Cryosystems) open-flow nitrogen cryostat. The structure was solved by direct method and refined by full-matrix least squares on  $F^2$  for all data using Olex2<sup>S4</sup> and SHELXTL<sup>S5</sup> softwares. All non-disordered non-hydrogen atoms were refined anisotropically, hydrogen atoms were placed in the calculated positions and refined in riding mode. Disordered atoms were refined in isotropic approximation with fixed SOF=0.5 and restrained (SADI) C-C distances. Crystal data and parameters of refinement are listed in Tables S1-S3. Crystallographic data for the structure have been deposited with the Cambridge Crystallographic Data Centre as supplementary publication CCDC-2143627.

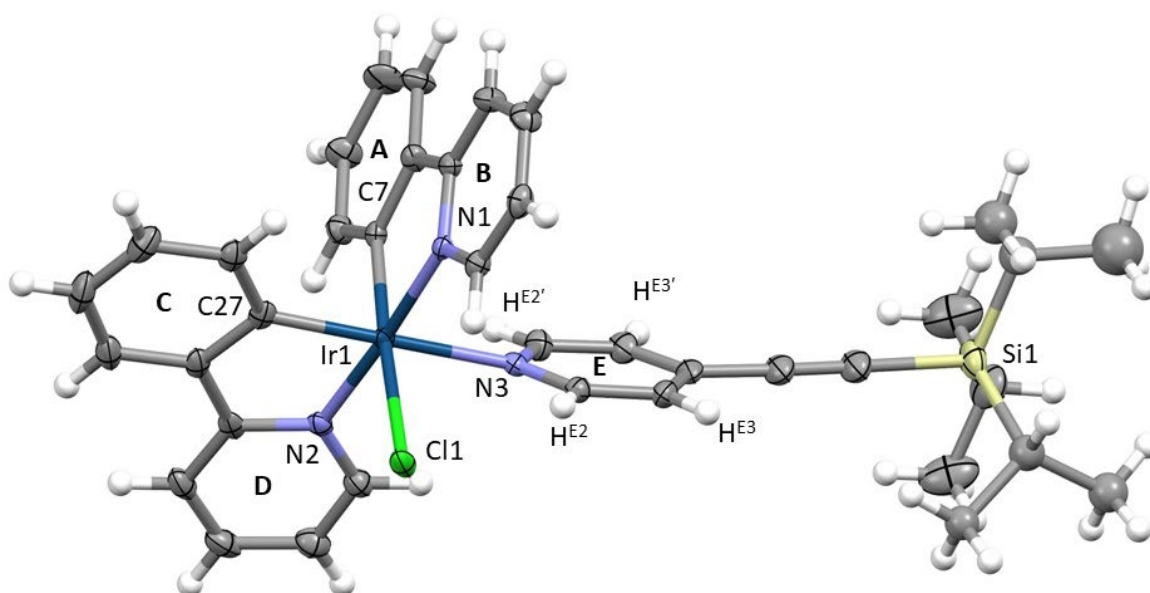

**Figure S11.** Crystal structure of complex **1** ( $\Lambda$  enantiomer) with the disorder removed for clarity and the thermal ellipsoids displayed at 50% probability.

**Table S1.** Crystal data and structure refinement for **1**.

|                                             |                                                       |
|---------------------------------------------|-------------------------------------------------------|
| Empirical formula                           | C <sub>38</sub> H <sub>41</sub> ClIrN <sub>3</sub> Si |
| Formula weight                              | 795.48                                                |
| Temperature/K                               | 120.0                                                 |
| Crystal system                              | monoclinic                                            |
| Space group                                 | P2 <sub>1</sub> /c                                    |
| a/Å                                         | 14.3230(2)                                            |
| b/Å                                         | 22.6945(4)                                            |
| c/Å                                         | 11.3723(3)                                            |
| β/°                                         | 104.7440(19)                                          |
| Volume/Å <sup>3</sup>                       | 3574.88(12)                                           |
| Z                                           | 4                                                     |
| ρ <sub>calc</sub> /cm <sup>3</sup>          | 1.478                                                 |
| μ/mm <sup>-1</sup>                          | 3.873                                                 |
| F(000)                                      | 1592.0                                                |
| Reflections collected                       | 58858                                                 |
| Independent reflections                     | 10427 [R <sub>int</sub> = 0.0611]                     |
| Data/restraints/parameters                  | 10427/28/401                                          |
| Goodness-of-fit on F <sup>2</sup>           | 1.021                                                 |
| Final R <sub>1</sub> index [≥2σ (I)]        | 0.0335                                                |
| Final wR <sub>2</sub> index [all data]      | 0.0653                                                |
| Largest diff. peak/hole / e Å <sup>-3</sup> | 1.39/-0.76                                            |



**Table S2.** Selected bond lengths for **1**.

| Atom | Atom | Length/Å  |  | Atom | Atom | Length/Å |
|------|------|-----------|--|------|------|----------|
| Ir1  | Cl1  | 2.4695(7) |  | C10  | C11  | 1.372(5) |
| Ir1  | N1   | 2.043(2)  |  | C21  | C22  | 1.369(4) |
| Ir1  | N2   | 2.034(3)  |  | C22  | C23  | 1.376(5) |
| Ir1  | N3   | 2.178(3)  |  | C23  | C24  | 1.376(5) |
| Ir1  | C7   | 2.000(3)  |  | C24  | C25  | 1.389(4) |
| Ir1  | C27  | 1.992(3)  |  | C25  | C26  | 1.459(5) |
| Si1  | C47  | 1.837(4)  |  | C26  | C27  | 1.413(4) |
| Si1  | C48  | 1.871(4)  |  | C26  | C31  | 1.401(4) |
| Si1  | C51A | 2.005(10) |  | C27  | C28  | 1.402(4) |
| Si1  | C51B | 1.775(10) |  | C28  | C29  | 1.393(5) |
| Si1  | C54A | 1.799(8)  |  | C29  | C30  | 1.384(5) |
| Si1  | C54B | 1.968(9)  |  | C30  | C31  | 1.380(5) |
| N1   | C1   | 1.347(4)  |  | C41  | C42  | 1.374(4) |
| N1   | C5   | 1.366(4)  |  | C42  | C43  | 1.391(5) |
| N2   | C21  | 1.342(4)  |  | C43  | C44  | 1.400(5) |
| N2   | C25  | 1.359(4)  |  | C43  | C46  | 1.433(5) |
| N3   | C41  | 1.338(4)  |  | C44  | C45  | 1.375(4) |
| N3   | C45  | 1.347(4)  |  | C46  | C47  | 1.199(5) |
| C1   | C2   | 1.371(4)  |  | C48  | C49  | 1.523(6) |
| C2   | C3   | 1.379(5)  |  | C48  | C50  | 1.524(6) |
| C3   | C4   | 1.378(4)  |  | C51A | C52A | 1.532(5) |
| C4   | C5   | 1.383(4)  |  | C51A | C53A | 1.530(5) |
| C5   | C6   | 1.466(4)  |  | C51B | C52B | 1.532(5) |
| C6   | C7   | 1.408(4)  |  | C51B | C53B | 1.531(5) |
| C6   | C11  | 1.395(4)  |  | C54A | C55A | 1.533(5) |
| C7   | C8   | 1.396(4)  |  | C54A | C56A | 1.529(5) |
| C8   | C9   | 1.385(4)  |  | C54B | C55B | 1.532(5) |
| C9   | C10  | 1.388(5)  |  | C54B | C56B | 1.530(5) |

**Table S3.** Selected bond angles for **1**.

| Atom | Atom | Atom | Angle <sup>°</sup> | Atom | Atom | Atom | Angle <sup>°</sup> |
|------|------|------|--------------------|------|------|------|--------------------|
| N1   | Ir1  | C11  | 96.26(7)           | C6   | C7   | Ir1  | 114.5(2)           |
| N1   | Ir1  | N3   | 85.41(9)           | C8   | C7   | Ir1  | 128.2(2)           |
| N2   | Ir1  | C11  | 86.09(7)           | C8   | C7   | C6   | 117.3(3)           |
| N2   | Ir1  | N1   | 176.33(10)         | C9   | C8   | C7   | 121.3(3)           |
| N2   | Ir1  | N3   | 97.49(10)          | C8   | C9   | C10  | 120.5(3)           |
| N3   | Ir1  | C11  | 88.52(7)           | C11  | C10  | C9   | 119.7(3)           |
| C7   | Ir1  | C11  | 176.37(8)          | C10  | C11  | C6   | 120.2(3)           |
| C7   | Ir1  | N1   | 80.42(11)          | N2   | C21  | C22  | 123.0(3)           |
| C7   | Ir1  | N2   | 97.30(11)          | C21  | C22  | C23  | 118.6(3)           |
| C7   | Ir1  | N3   | 89.76(10)          | C22  | C23  | C24  | 119.4(3)           |
| C27  | Ir1  | C11  | 93.83(8)           | C23  | C24  | C25  | 119.8(3)           |
| C27  | Ir1  | N1   | 96.79(11)          | N2   | C25  | C24  | 120.4(3)           |
| C27  | Ir1  | N2   | 80.21(12)          | N2   | C25  | C26  | 113.7(3)           |
| C27  | Ir1  | N3   | 176.58(11)         | C24  | C25  | C26  | 125.9(3)           |
| C27  | Ir1  | C7   | 88.04(11)          | C27  | C26  | C25  | 114.6(3)           |
| C47  | Si1  | C48  | 107.32(18)         | C31  | C26  | C25  | 123.1(3)           |
| C47  | Si1  | C51A | 104.9(2)           | C31  | C26  | C27  | 122.3(3)           |
| C47  | Si1  | C54B | 99.9(3)            | C26  | C27  | Ir1  | 115.1(2)           |
| C48  | Si1  | C51A | 110.6(3)           | C28  | C27  | Ir1  | 128.5(3)           |
| C48  | Si1  | C54B | 110.2(3)           | C28  | C27  | C26  | 116.4(3)           |
| C51B | Si1  | C47  | 111.4(3)           | C29  | C28  | C27  | 121.2(3)           |
| C51B | Si1  | C48  | 113.5(3)           | C30  | C29  | C28  | 121.0(3)           |
| C51B | Si1  | C51A | 9.3(4)             | C31  | C30  | C29  | 119.8(3)           |
| C51B | Si1  | C54A | 99.7(4)            | C30  | C31  | C26  | 119.4(3)           |
| C51B | Si1  | C54B | 113.6(4)           | N3   | C41  | C42  | 123.3(3)           |
| C54A | Si1  | C47  | 111.9(3)           | C41  | C42  | C43  | 119.4(3)           |
| C54A | Si1  | C48  | 113.1(3)           | C42  | C43  | C44  | 117.6(3)           |
| C54A | Si1  | C51A | 108.8(4)           | C42  | C43  | C46  | 120.7(3)           |
| C54A | Si1  | C54B | 15.1(4)            | C44  | C43  | C46  | 121.7(3)           |
| C54B | Si1  | C51A | 122.2(4)           | C45  | C44  | C43  | 119.1(3)           |
| C1   | N1   | Ir1  | 124.9(2)           | N3   | C45  | C44  | 123.2(3)           |
| C1   | N1   | C5   | 118.7(3)           | C47  | C46  | C43  | 177.0(4)           |
| C5   | N1   | Ir1  | 116.4(2)           | C46  | C47  | Si1  | 178.3(3)           |
| C21  | N2   | Ir1  | 124.7(2)           | C49  | C48  | Si1  | 112.9(3)           |
| C21  | N2   | C25  | 118.8(3)           | C49  | C48  | C50  | 110.2(4)           |
| C25  | N2   | Ir1  | 116.4(2)           | C50  | C48  | Si1  | 111.4(3)           |
| C41  | N3   | Ir1  | 120.1(2)           | C52A | C51A | Si1  | 111.9(6)           |
| C41  | N3   | C45  | 117.3(3)           | C53A | C51A | Si1  | 113.4(6)           |
| C45  | N3   | Ir1  | 122.1(2)           | C53A | C51A | C52A | 112.2(7)           |
| N1   | C1   | C2   | 122.5(3)           | C52B | C51B | Si1  | 114.1(7)           |
| C1   | C2   | C3   | 119.2(3)           | C53B | C51B | Si1  | 115.1(7)           |
| C4   | C3   | C2   | 118.9(3)           | C53B | C51B | C52B | 107.6(8)           |
| C3   | C4   | C5   | 120.1(3)           | C55A | C54A | Si1  | 115.0(7)           |
| N1   | C5   | C4   | 120.5(3)           | C56A | C54A | Si1  | 116.5(6)           |
| N1   | C5   | C6   | 112.9(3)           | C56A | C54A | C55A | 105.5(8)           |
| C4   | C5   | C6   | 126.6(3)           | C55B | C54B | Si1  | 109.4(7)           |
| C7   | C6   | C5   | 115.7(3)           | C56B | C54B | Si1  | 111.0(6)           |
| C11  | C6   | C5   | 123.2(3)           | C56B | C54B | C55B | 112.3(8)           |
| C11  | C6   | C7   | 121.1(3)           |      |      |      |                    |

**Table S4.** Comparison of Ir(N<sup>^</sup>C)<sub>2</sub>Cl(py-X) crystal structure data.

| CSD Refcode        | N <sup>^</sup> C | X                                 | Enantiomer | Cl-Ir-N(Py)-C(Py)  | Ir-N(Py)           |
|--------------------|------------------|-----------------------------------|------------|--------------------|--------------------|
| This work <b>1</b> | ppy              | CCSi <sup>i</sup> Pr <sub>3</sub> | Λ          | -37.4(2)           | 2.178(3)           |
| EMOQUS (A)         | ppy              | CHCH <sub>2</sub>                 | Λ          | -19.2(4)           | 2.203(4)           |
| GEXWAJ (C)         | ppy              | 2'-py                             | Δ          | 20.8(6)            | 2.216(7)           |
| QECZUX             | piq              | H                                 | Λ          | -27.8(4), 7.0(4)   | 2.219(2), 2.219(2) |
| POFJUQ             | pq               | H                                 | Λ          | -40.5(4)           | 2.221(5)           |
| Reference S6.      | btp              | H                                 | Λ          | -38.6(5)           | 2.171(6)           |
| Reference S6.      | btp              | BODIPY                            | Λ          | -36.5(2)           | 2.183(3)           |
| WEBDUF             | F2ppy            | H                                 | Λ          | -34.3(8)           | 2.18(1)            |
| BUZxec             | F2ppy            | FzaIr                             | Λ          | -30.9(8)           | 2.183(9)           |
| BUZXIG             | F2ppy            | FzaPt                             | Δ          | 19.4(7)            | 2.173(6)           |
| BUZYED             | F2ppy            | FzaH                              | Λ          | -38.9(9), -38.6(9) | 2.18(1), 2.19(1)   |

piq = phenylisoquinoline

pq = phenylquinoline

btp = 2-(2'-pyridyl)benzothiophene

Fza = formazanate

BODIPY = boron-dipyrromethene = 4,4-difluoro-4-bora-3a,4a-diaza-s-indacene

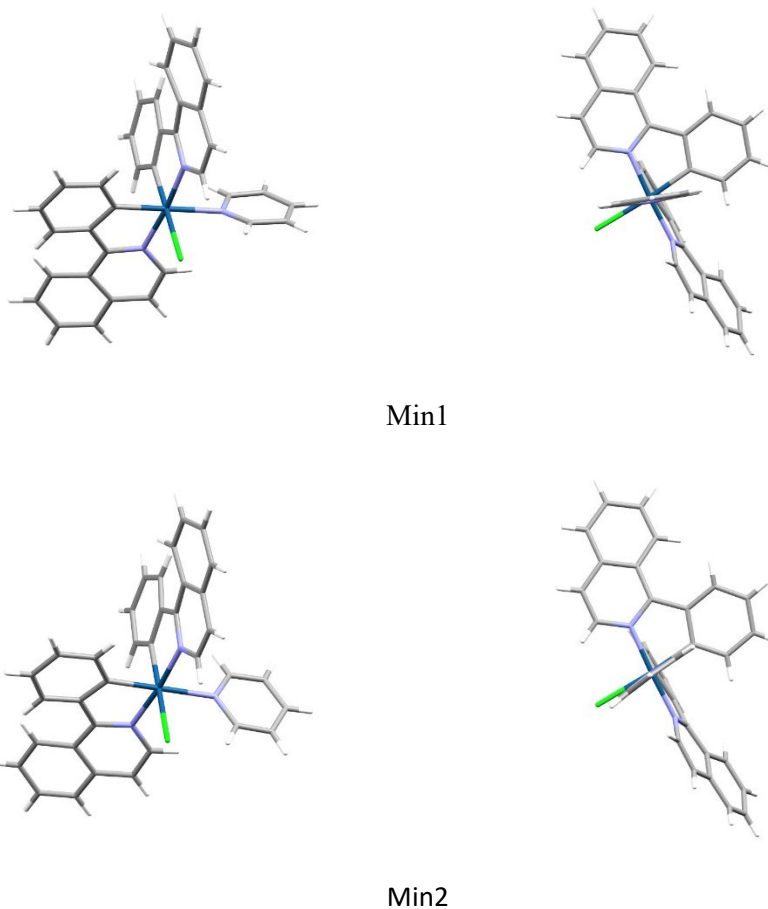**Figure S12.** The two conformers (Min1 and Min2) located in the reported crystal structure of Ir(piq)<sub>2</sub>(py)Cl (CSD refcode QECZUX).<sup>S7</sup>

## **S4 Variable temperature NMR spectra**

All variable temperature Nuclear Magnetic Resonance (VT NMR) spectra were recorded on a Varian DD2-500 spectrometer operating 499.53 MHz for  $^1\text{H}$ . For simplicity, the frequency will be rounded to 500 MHz in all subsequent spectra.

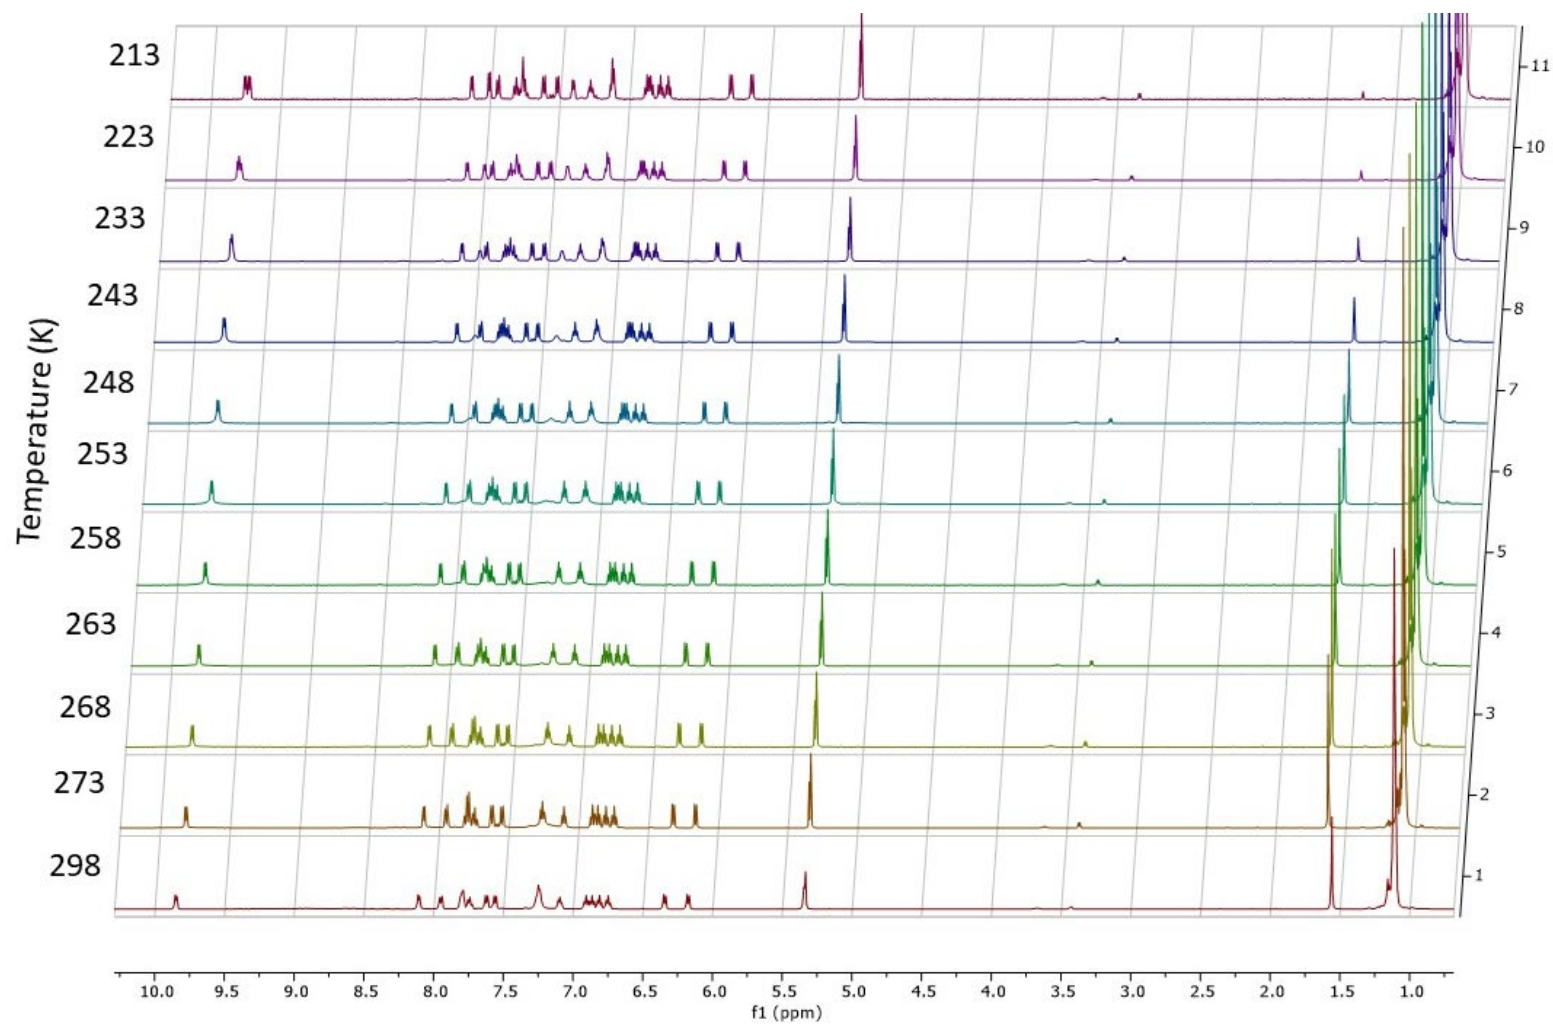

**Figure S13.** 500 MHz variable temperature <sup>1</sup>H NMR spectra of **1** recorded in DCM-d<sub>2</sub>.

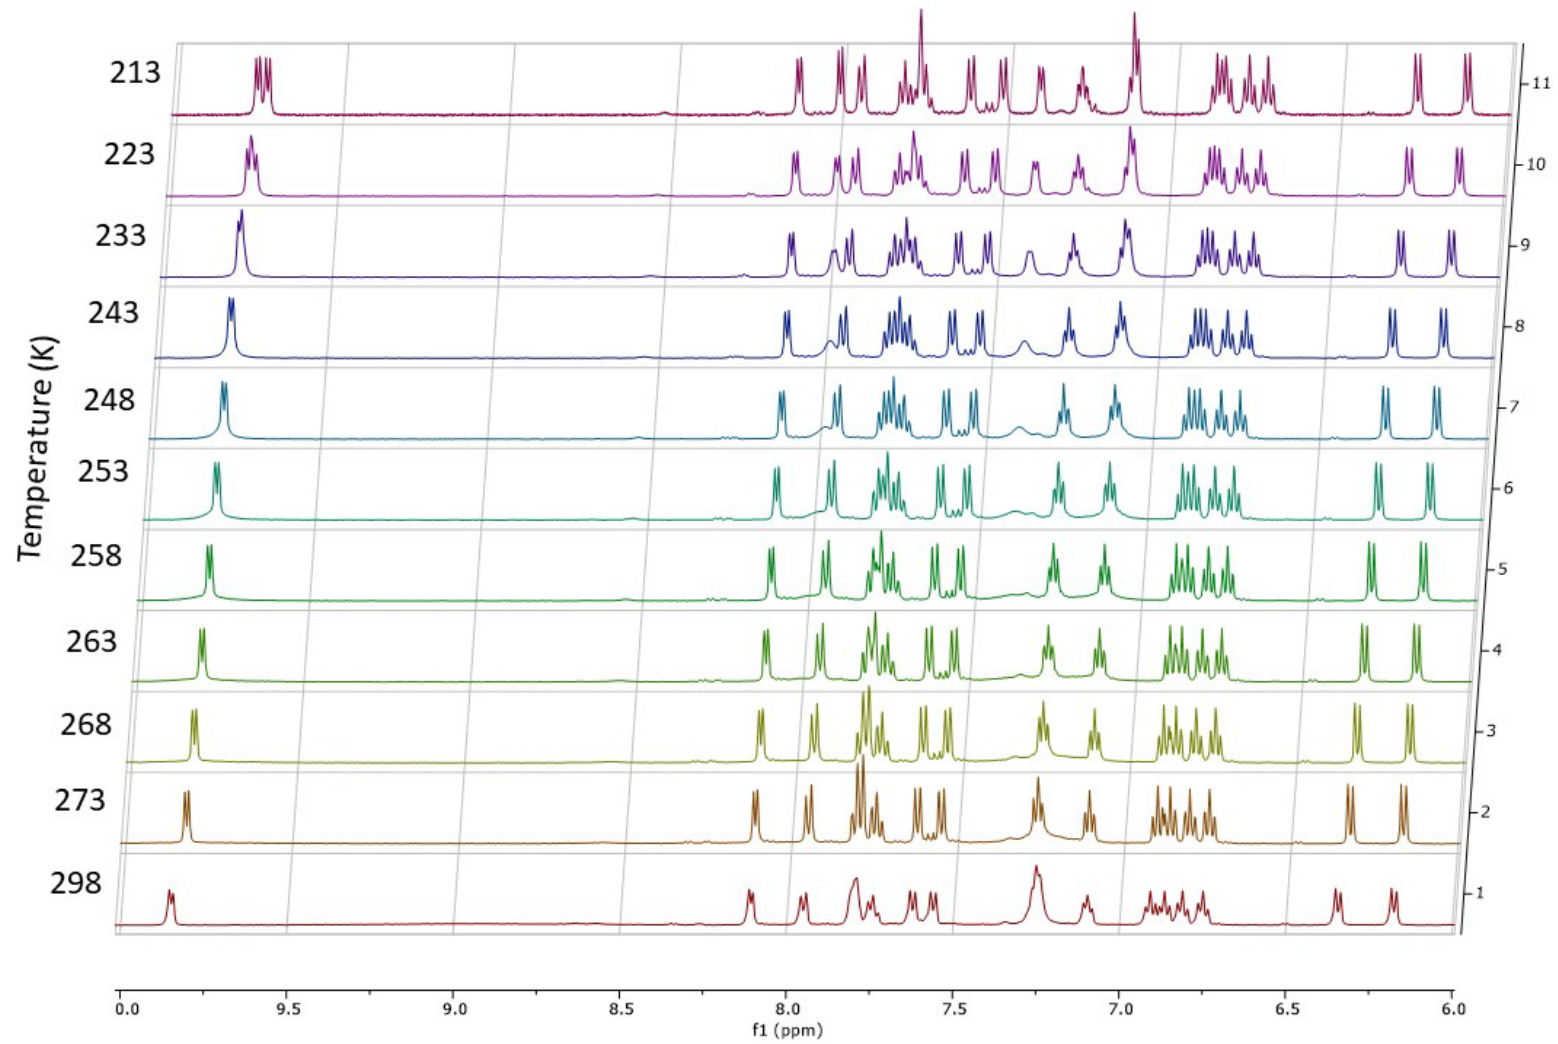

**Figure S14.** 500 MHz variable temperature <sup>1</sup>H NMR spectra (aromatic region) of **1** recorded in DCM-d<sub>2</sub>.

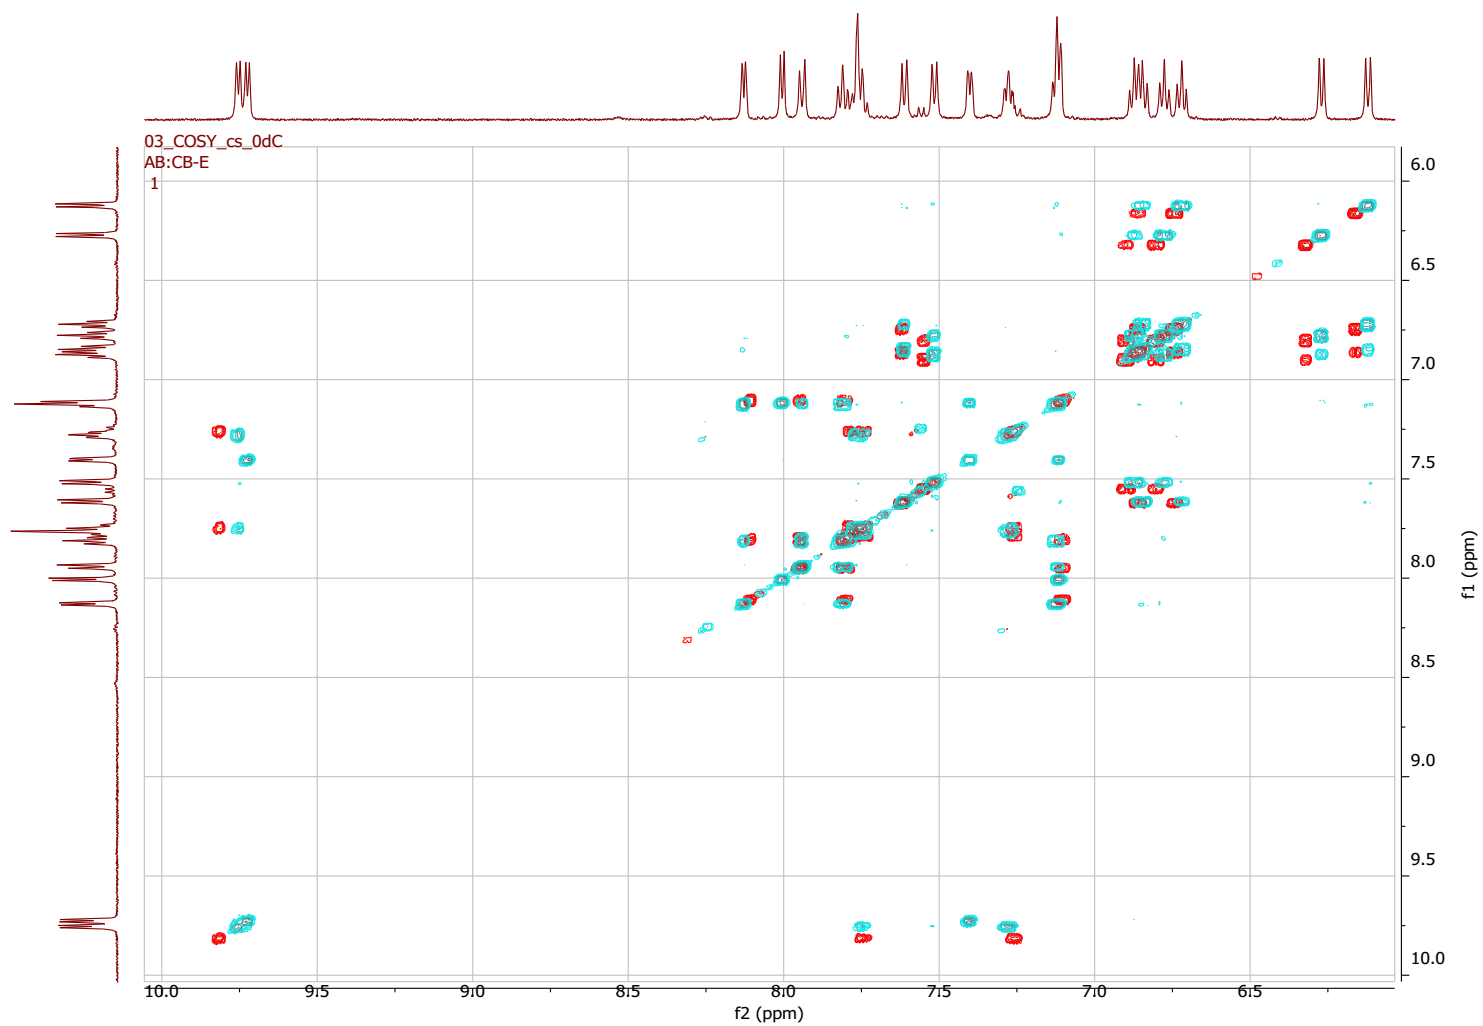

**Figure S15.** 500 MHz  $^1\text{H}$ - $^1\text{H}$  COSY NMR spectrum of **1** recorded in  $\text{CD}_2\text{Cl}_2$ , red = 273 K, blue = 213 K.

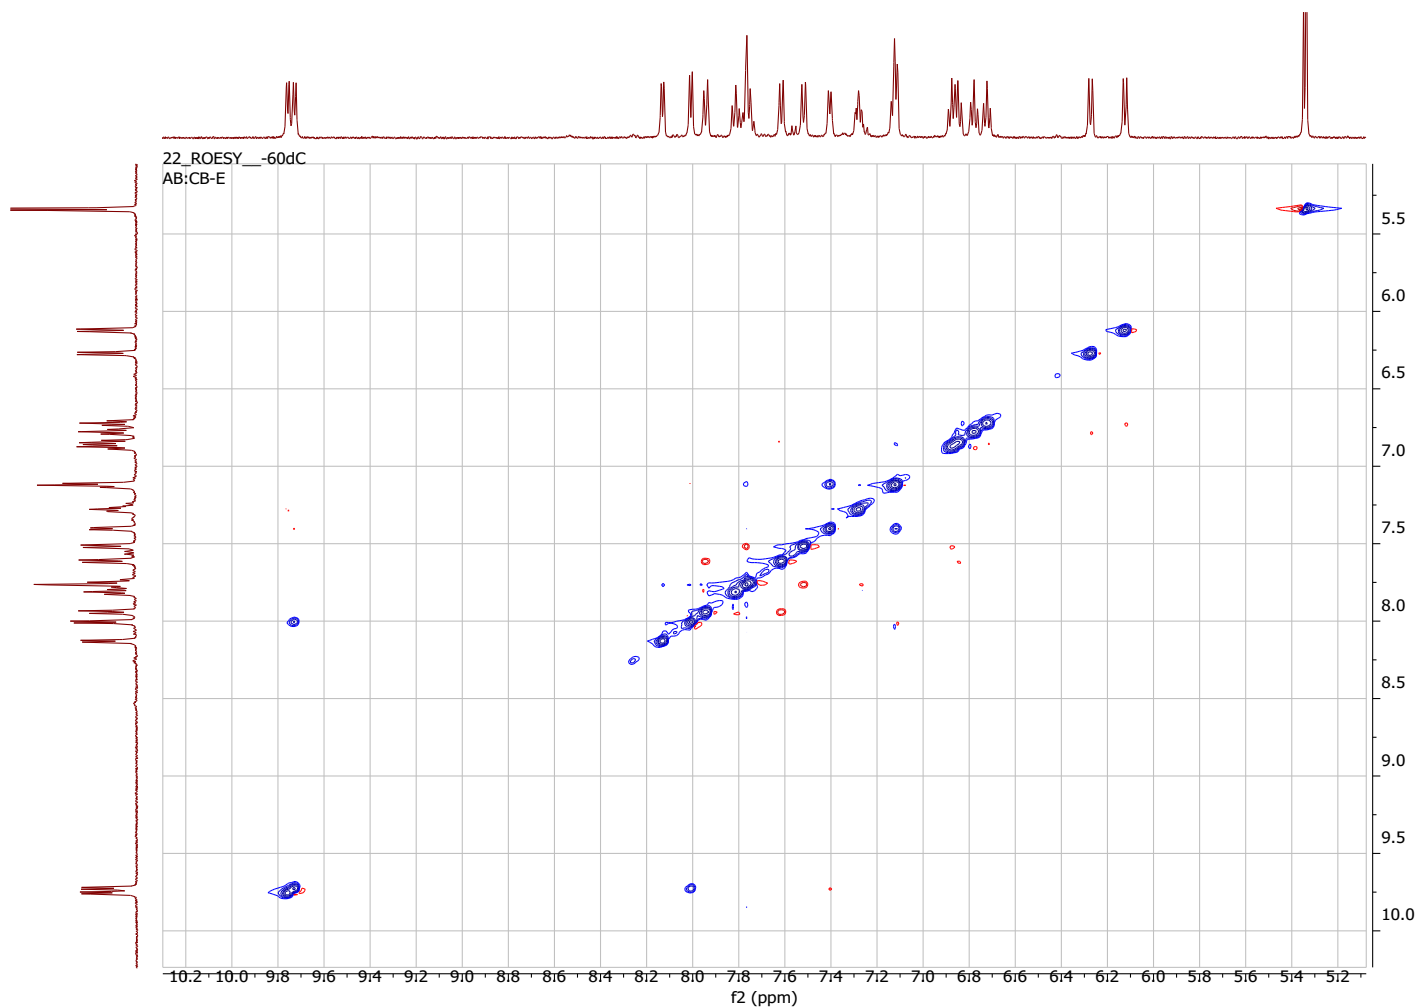

**Figure S16.** 500 MHz  $^1\text{H}$ - $^1\text{H}$  EASY-ROESY NMR spectrum of **1** recorded in  $\text{CD}_2\text{Cl}_2$  at 213K. Red cross-peaks represent spatial proximity, while blue cross-peaks represents conformational (as in this case) or chemical exchange. Blue peaks can also be due to homonuclear scalar interactions, although this type of ROESY minimizes these contributions. The  $^1\text{H}$ - $^1\text{H}$  COSY could be used to identify these peaks.



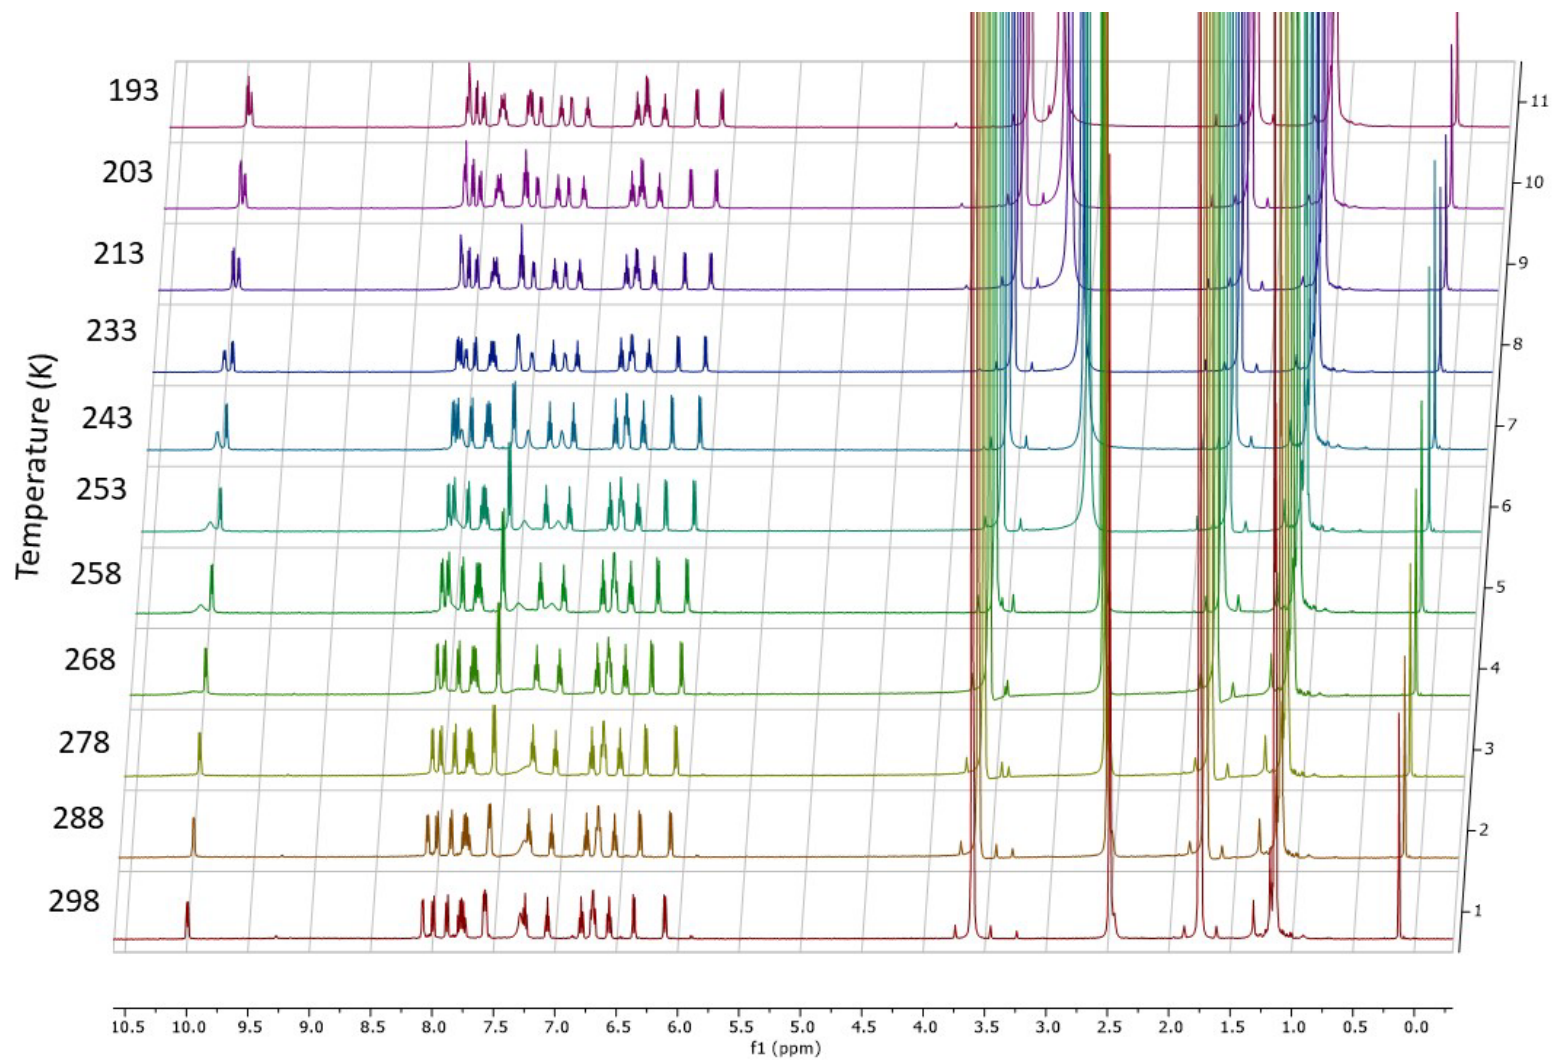

**Figure S17.** 500 MHz variable temperature <sup>1</sup>H NMR spectra of **1** recorded in THF-d<sub>8</sub>.

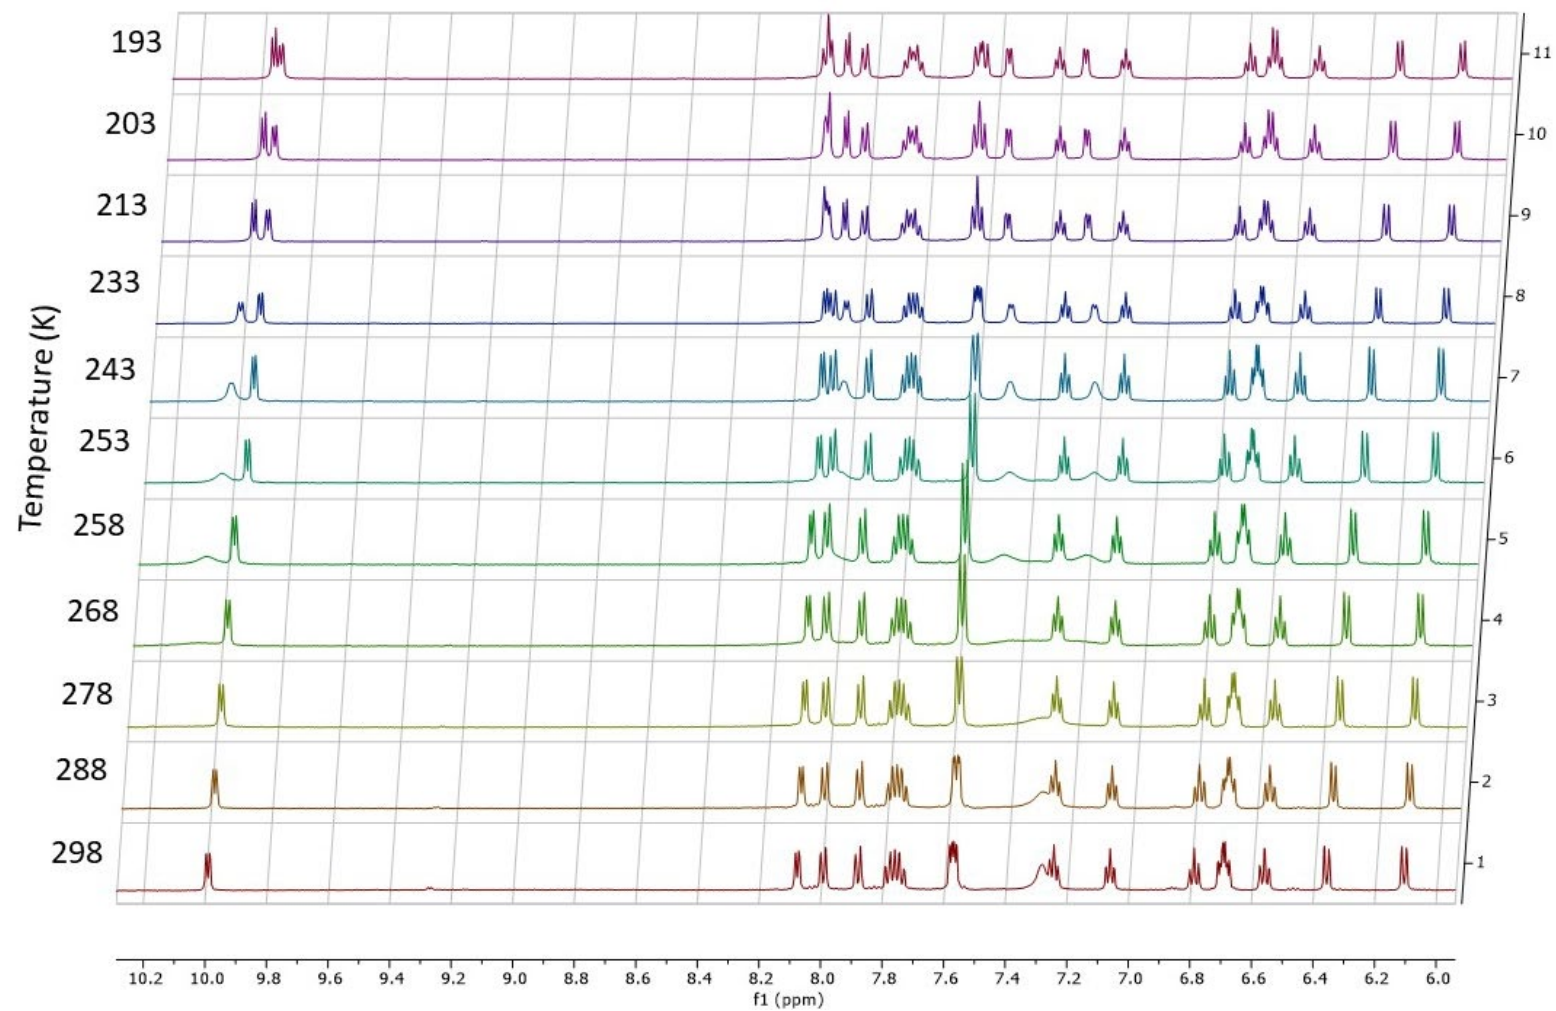

**Figure S18.** 500 MHz variable temperature <sup>1</sup>H NMR spectra of **1** recorded in THF-d<sub>8</sub>.

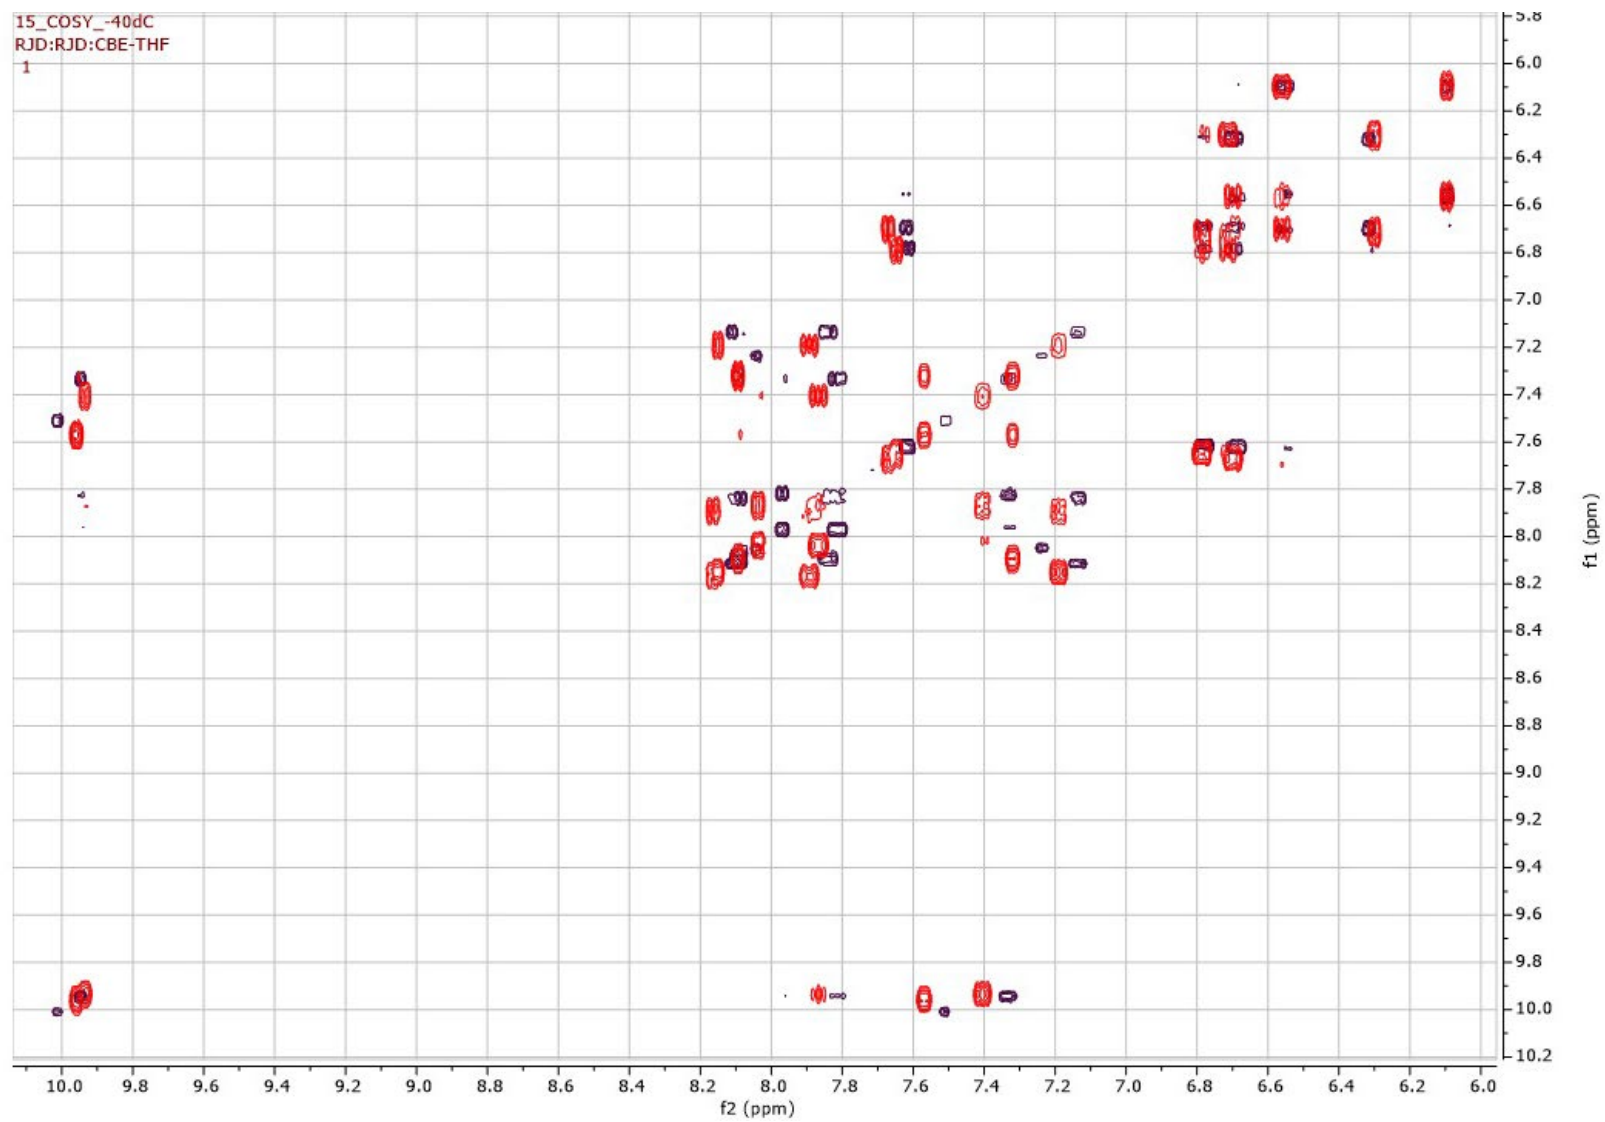

**Figure S19.** 500 MHz  $^1\text{H}$ - $^1\text{H}$  COSY NMR spectrum of **1** recorded in THF- $d_8$ , red = 233 K, purple = 193 K.

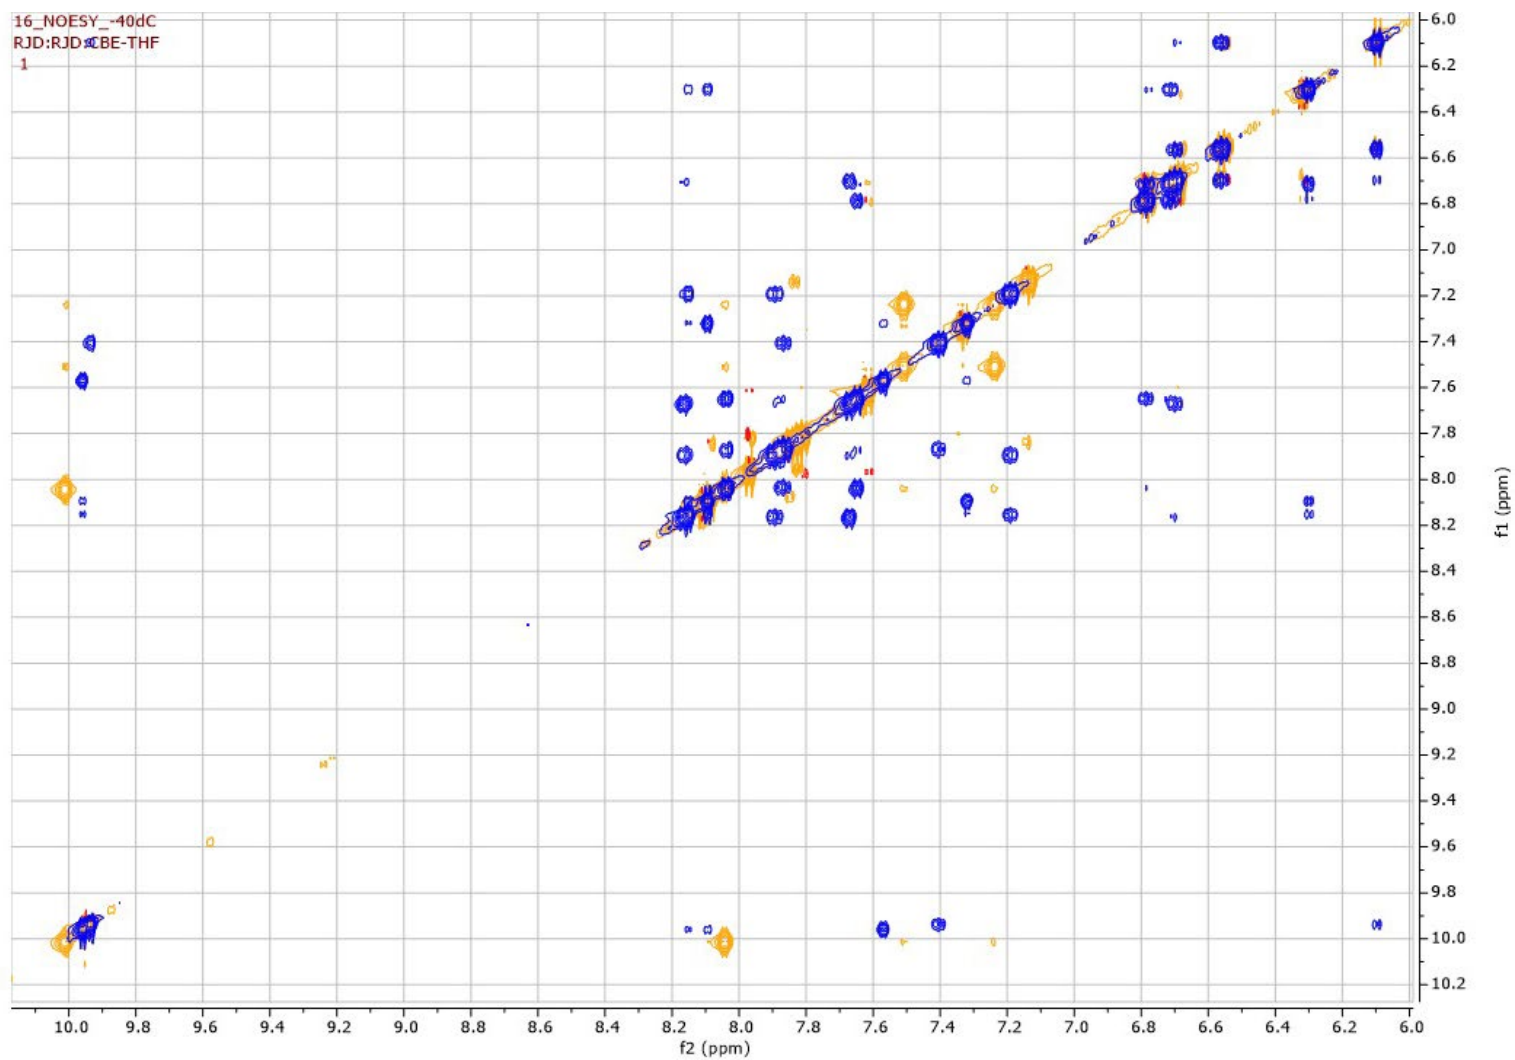

**Figure S20.** 500 MHz  $^1\text{H}$ - $^1\text{H}$  NOESY NMR spectrum of **1** recorded in  $\text{THF-d}_8$ , blue = 233 K, orange = 193 K. Because of the slow rotation of the complex with respect of the Larmor frequency, it is not possible to distinguish peaks due to proximity from peaks due to exchange. The EASY-ROESY presented in Figure S20 can differentiate between the two.

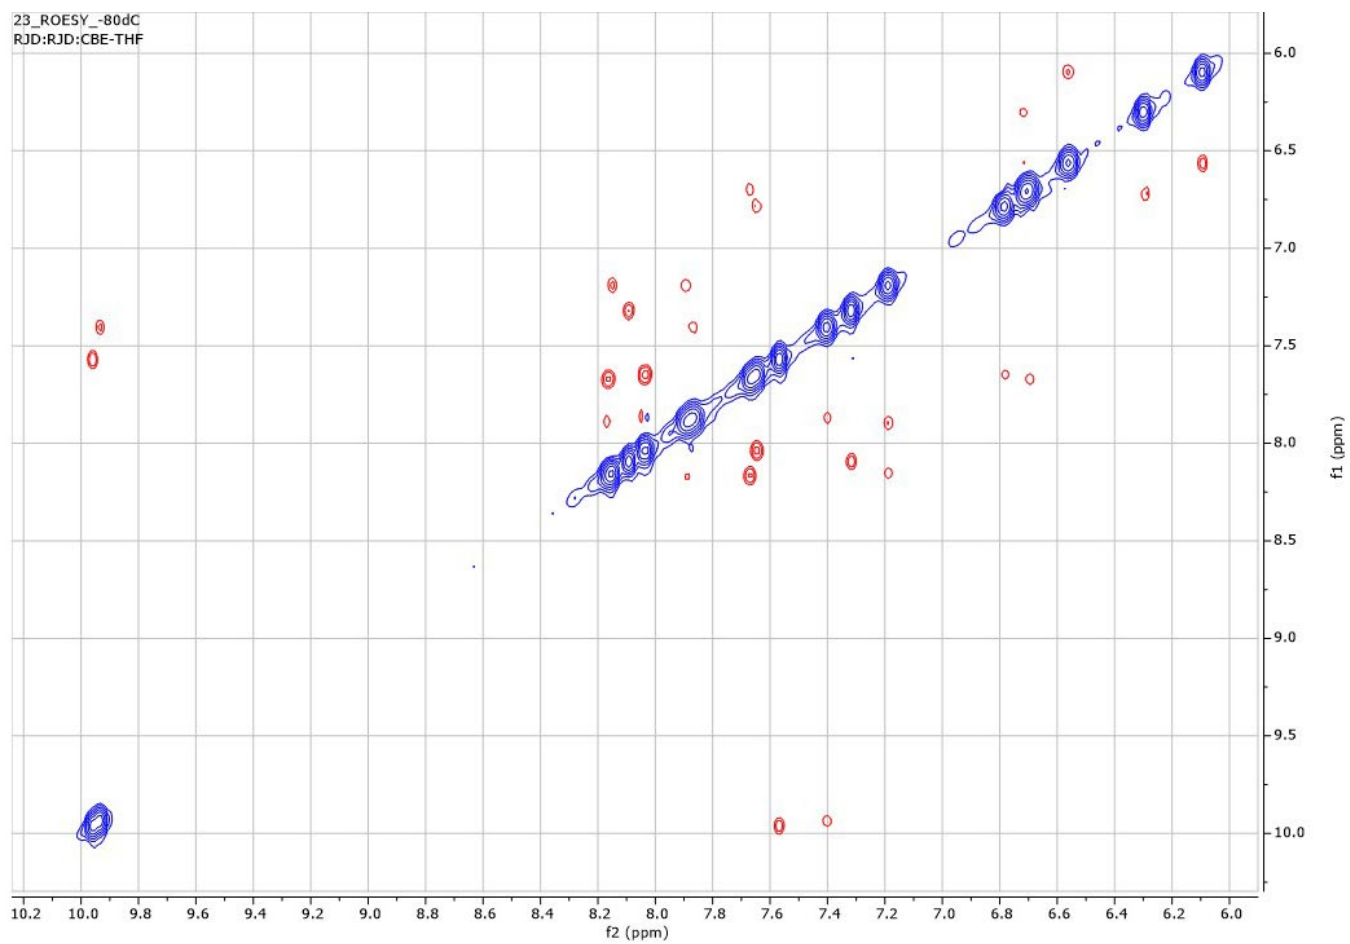

**Figure S21.** 500 MHz  $^1\text{H}$ - $^1\text{H}$  EASY-ROESY NMR spectrum of **1** recorded in THF- $d_8$  at 193K. Red cross-peaks represent spatial proximity.

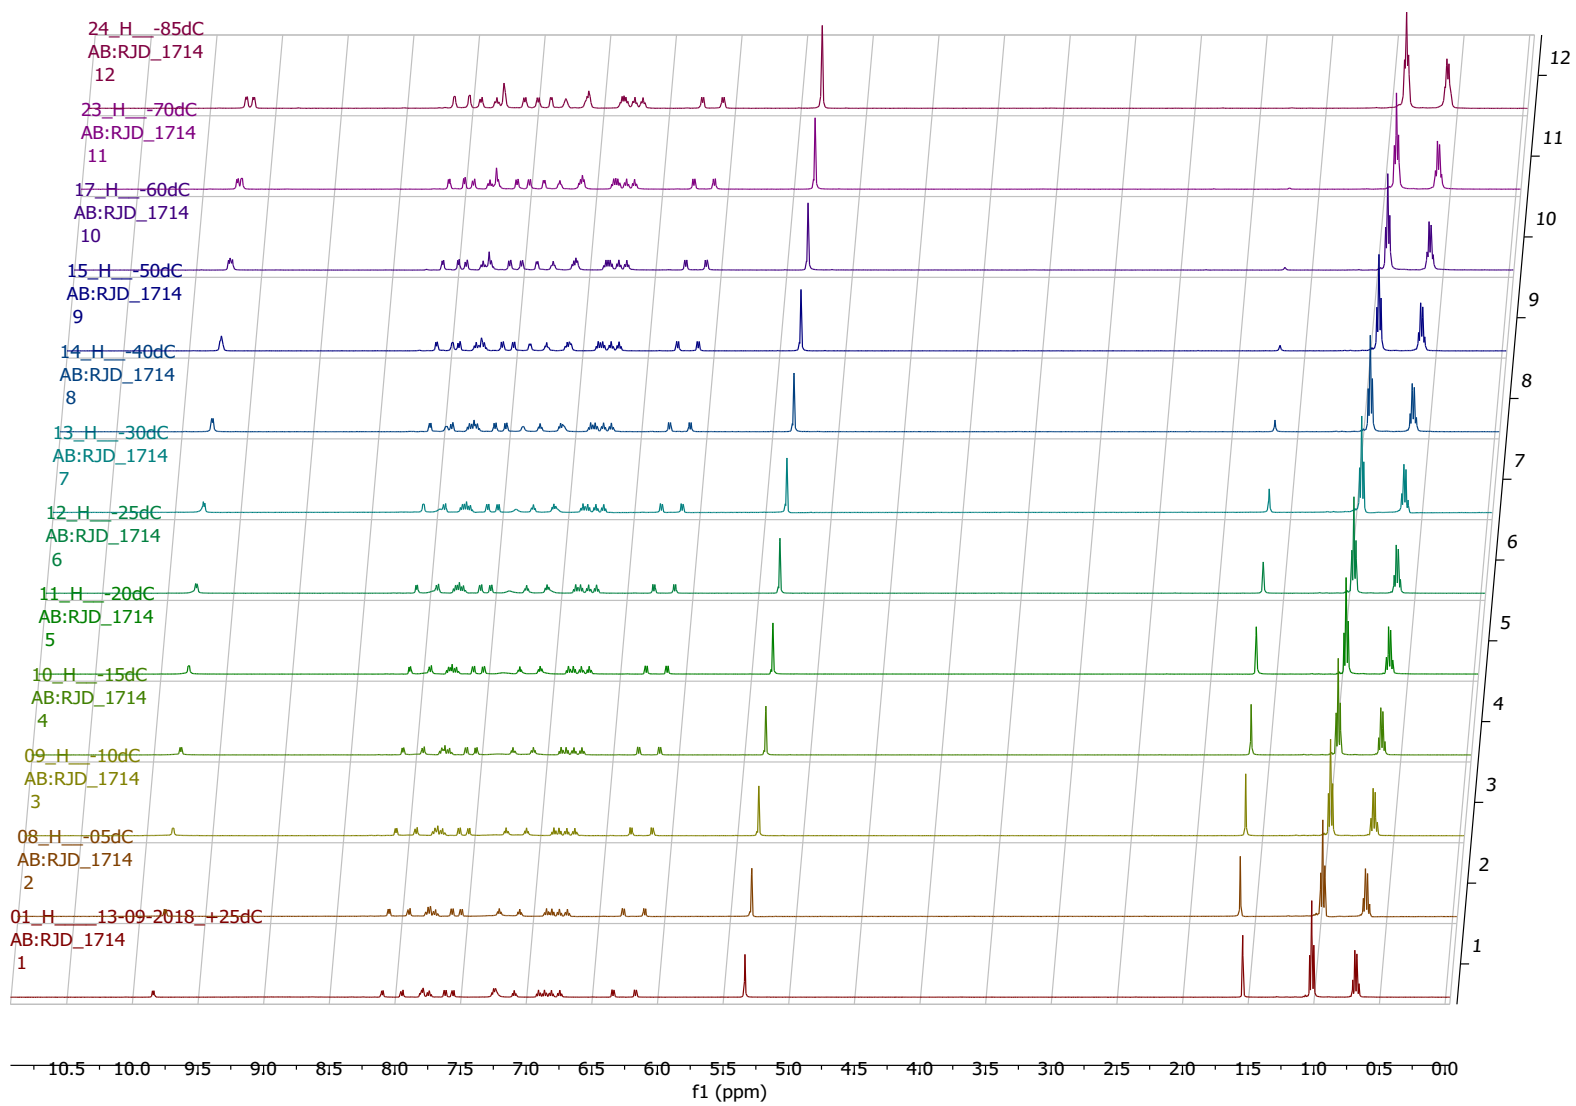

**Figure S22.** 500 MHz variable temperature <sup>1</sup>H NMR spectra of **2** recorded in CD<sub>2</sub>Cl<sub>2</sub>.

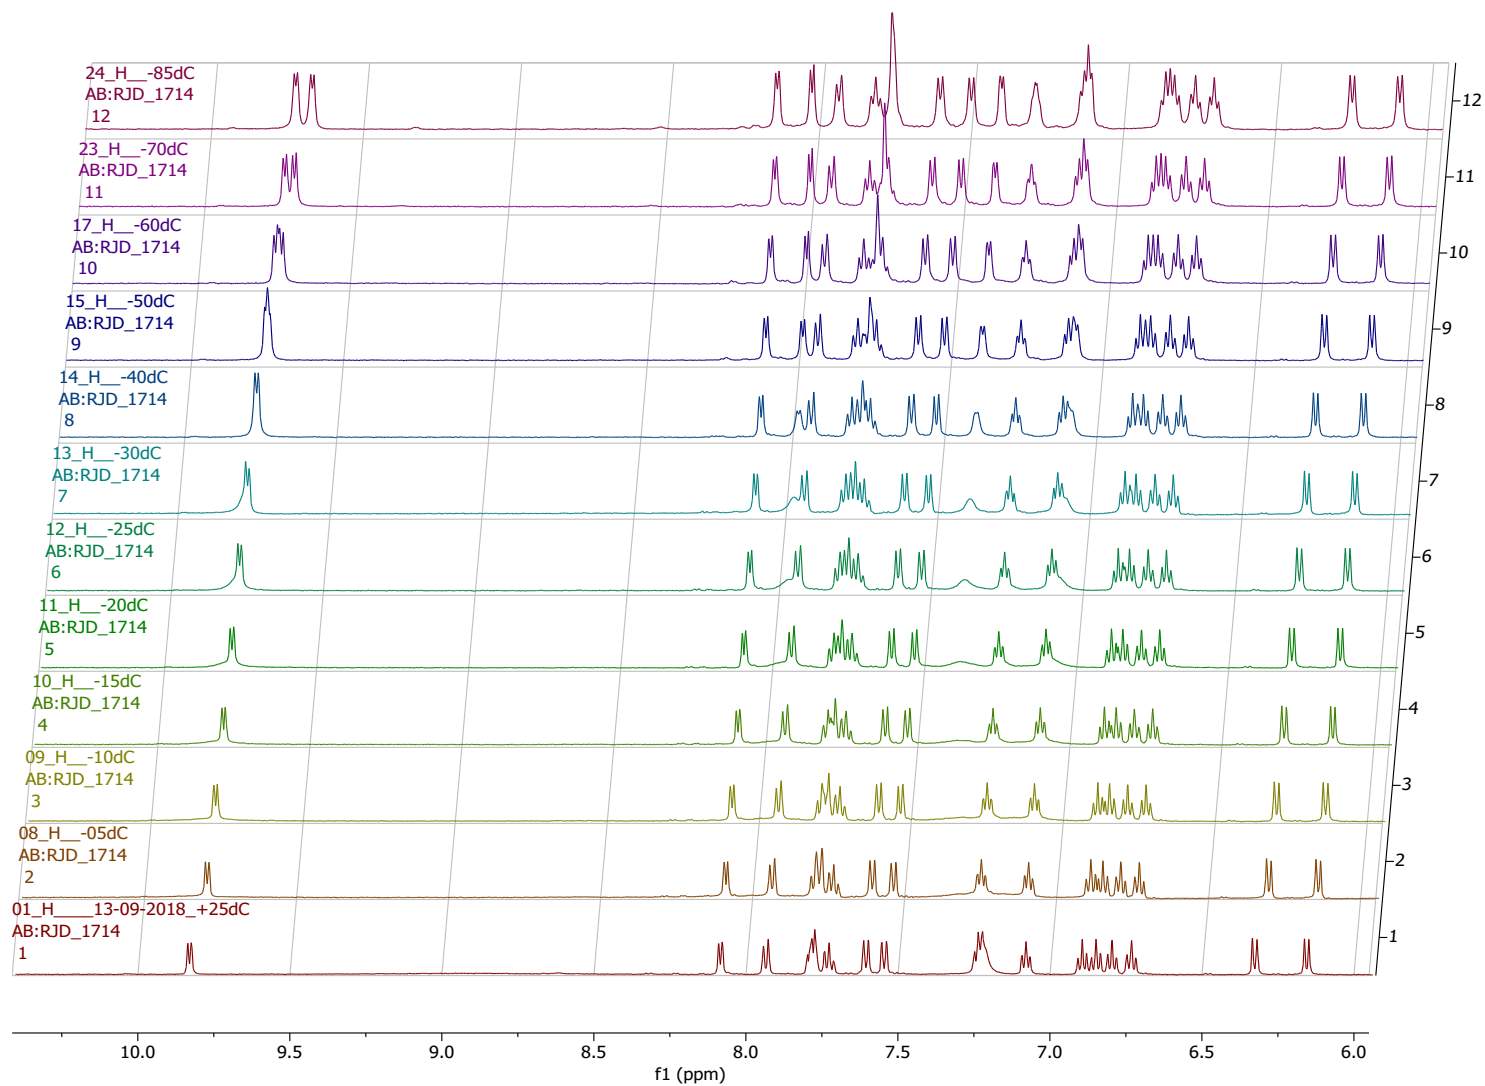

**Figure S23.** 500 MHz variable temperature <sup>1</sup>H NMR spectra (aromatic region) of **2** recorded in CD<sub>2</sub>Cl<sub>2</sub>.

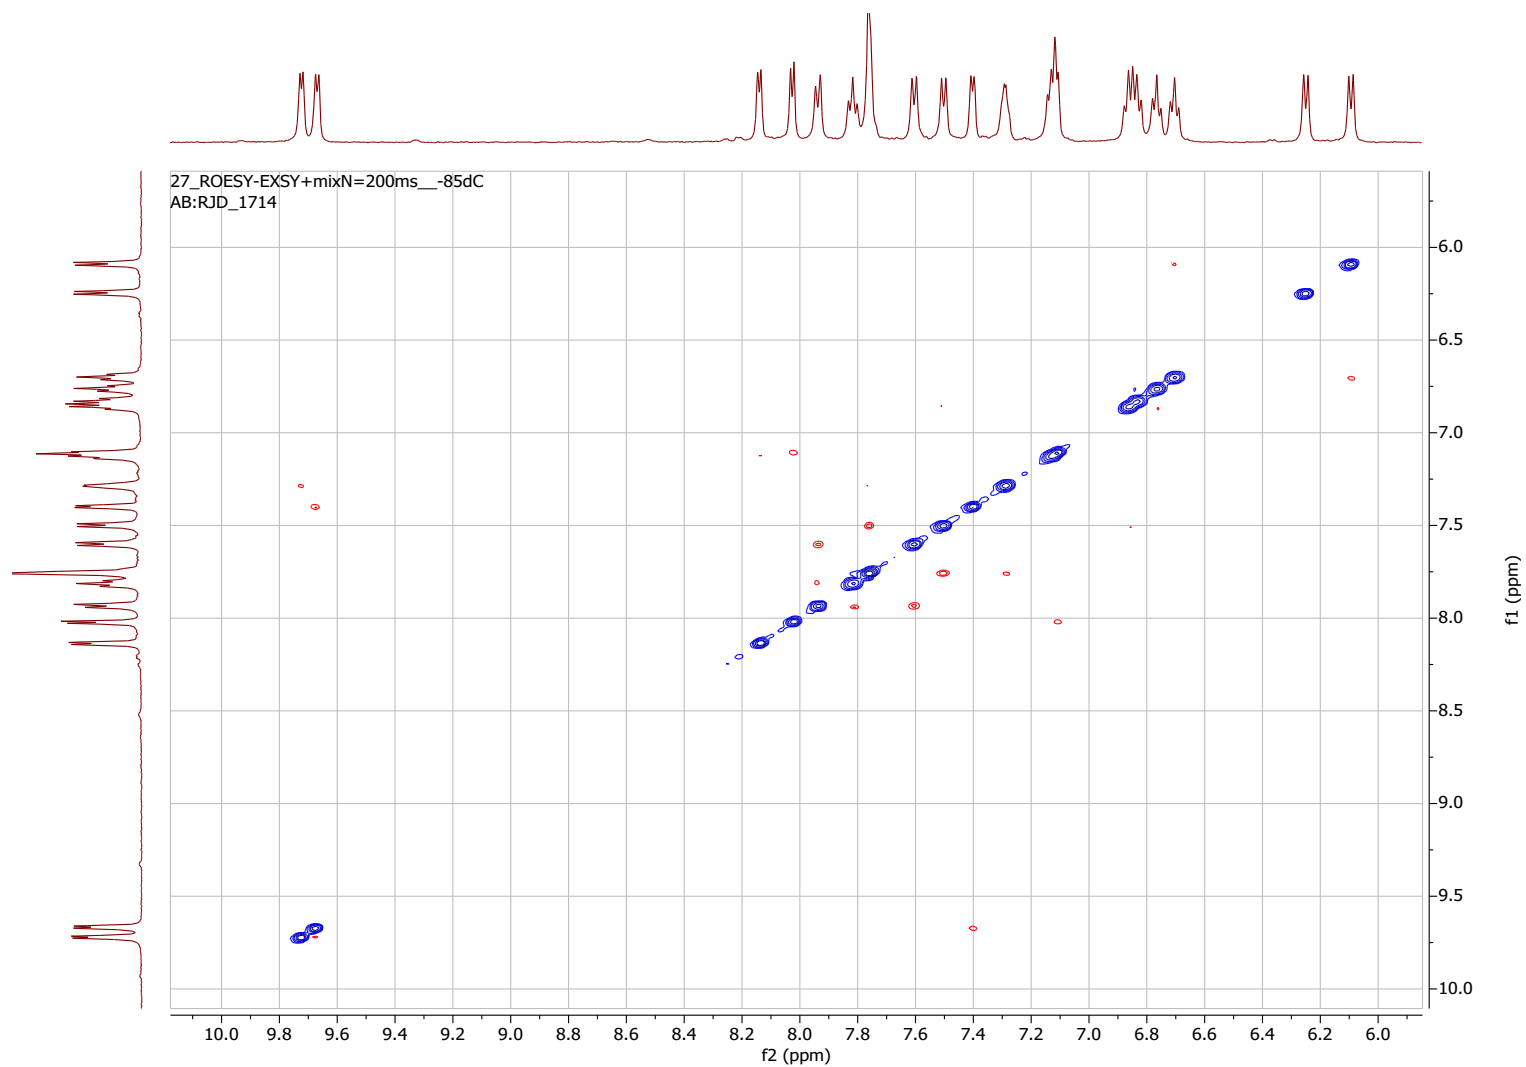

**Figure S24.** 500 MHz  $^1\text{H}$ - $^1\text{H}$  EASY-ROESY NMR spectrum of **2** recorded in  $\text{CD}_2\text{Cl}_2$  at 188 K. Red cross-peaks indicate spatial proximity between the correlated spins.



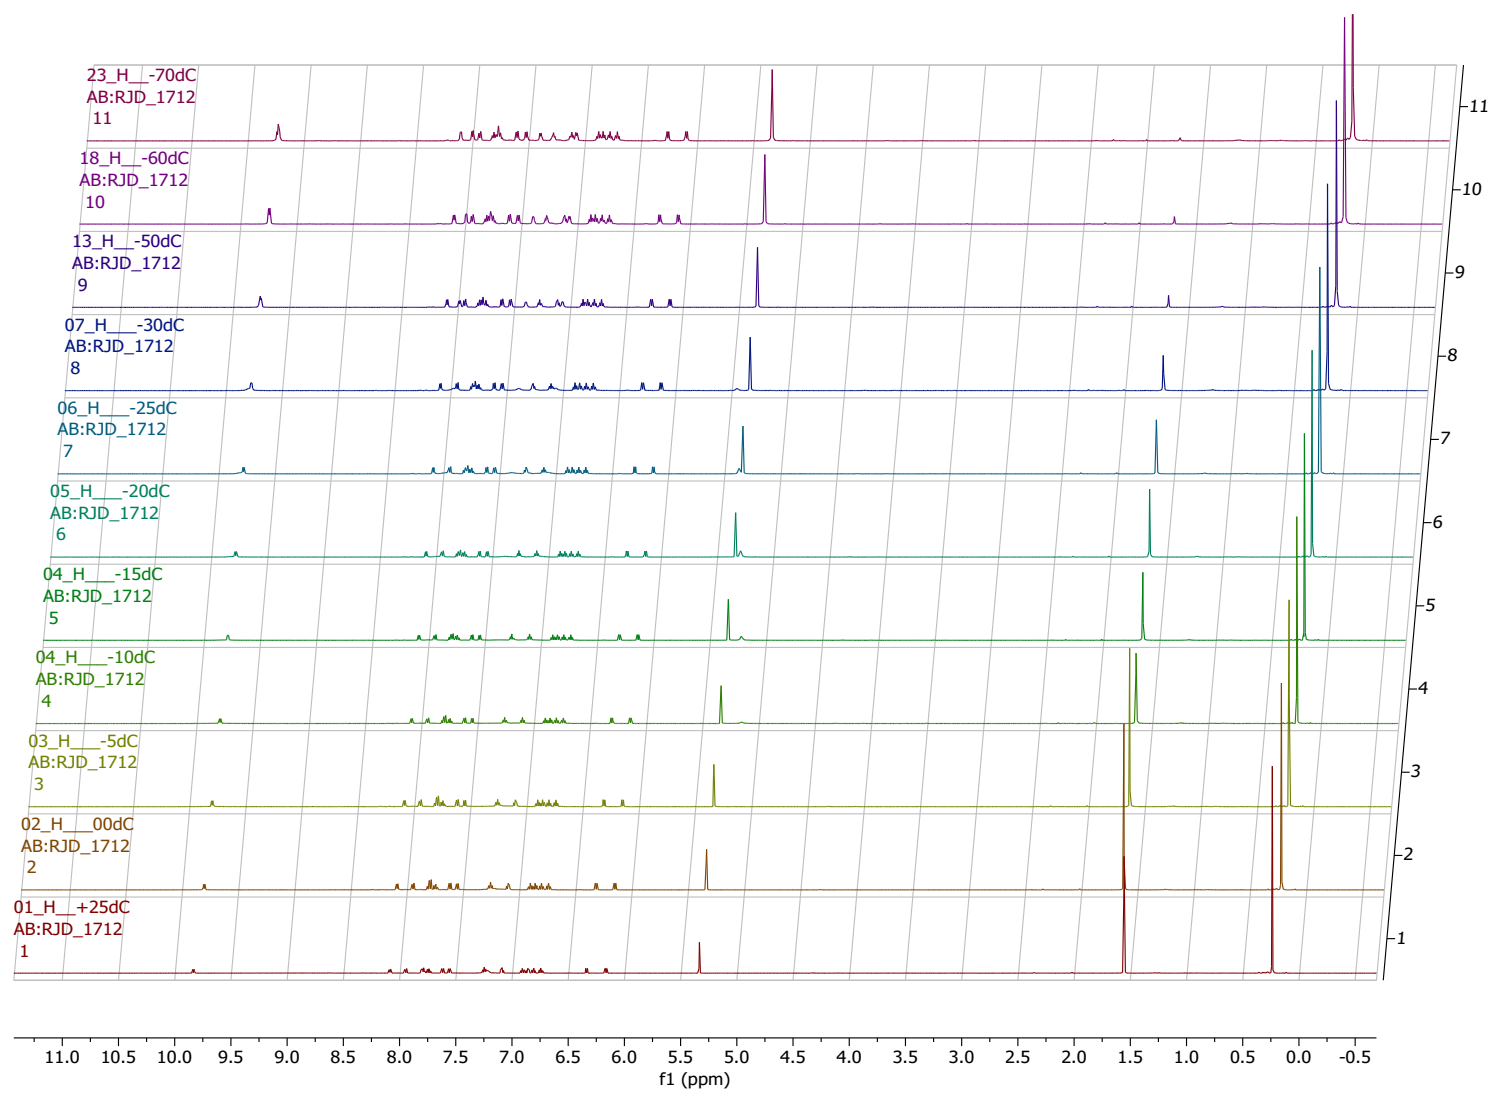

**Figure S25.** 500 MHz variable temperature  $^1\text{H}$  NMR spectra of **3** recorded in  $\text{CD}_2\text{Cl}_2$ .

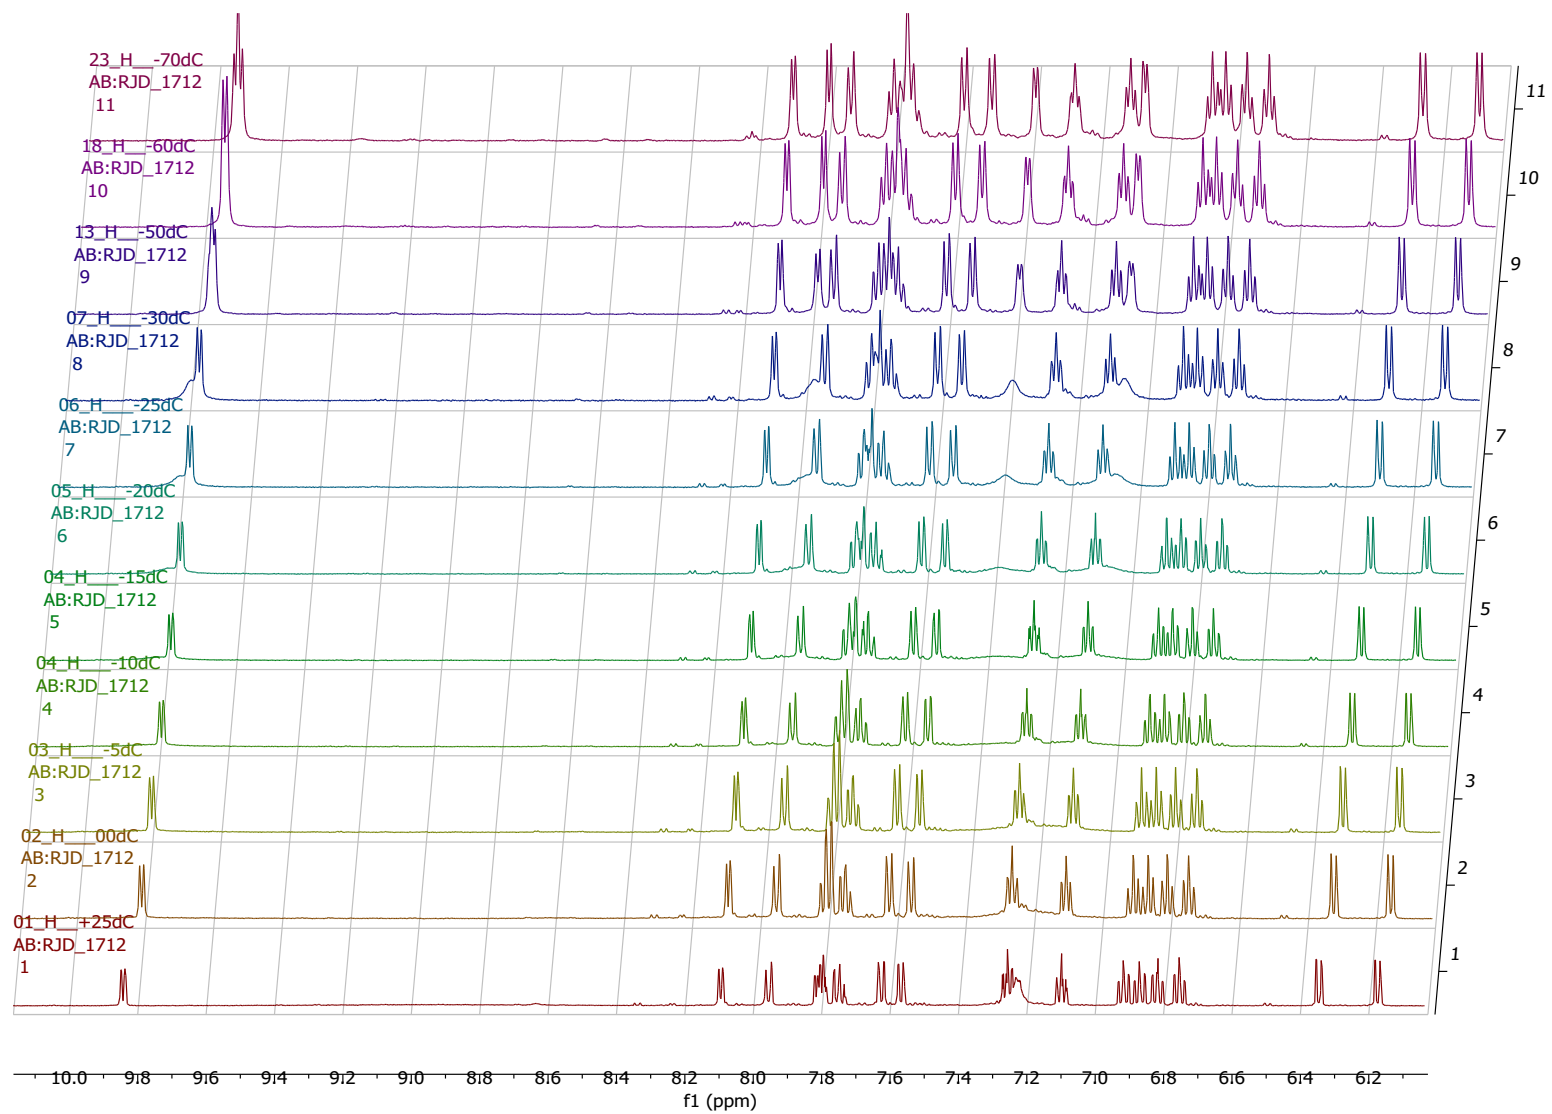

**Figure S26.** 500 MHz variable temperature <sup>1</sup>H NMR spectra (aromatic region) of **3** recorded in CD<sub>2</sub>Cl<sub>2</sub>.

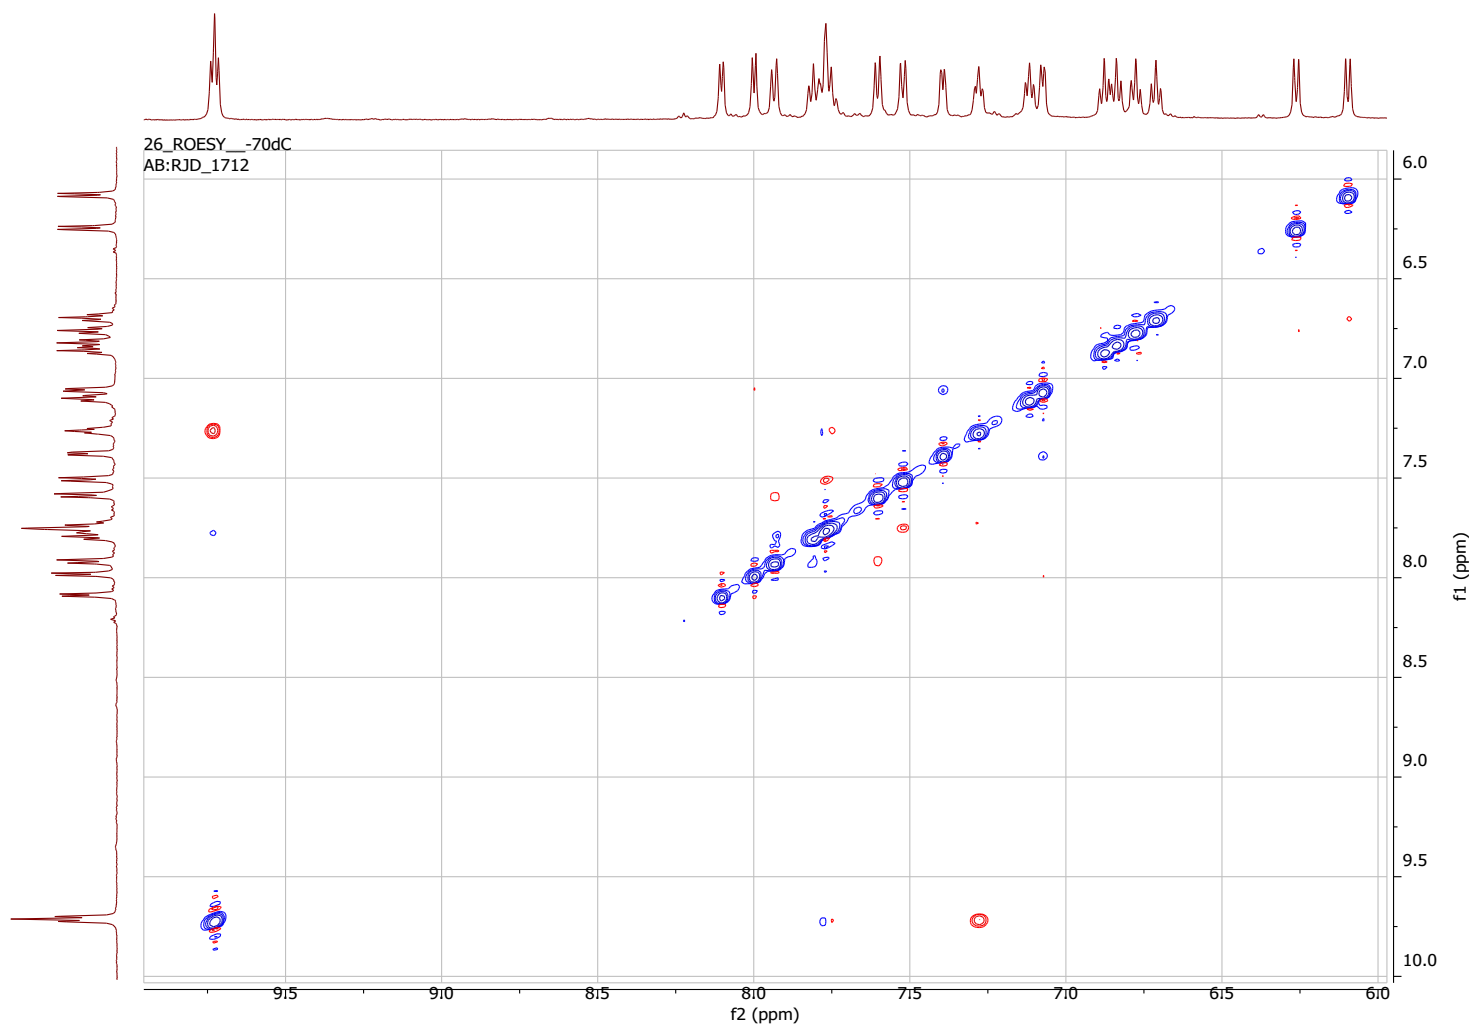

**Figure S27.** 500 MHz  $^1\text{H}$ - $^1\text{H}$  EASY-ROESY NMR spectrum of **3** recorded in  $\text{CD}_2\text{Cl}_2$  at 203 K. Red cross-peaks represent spatial proximity, while blue and red cross-peaks represents COSY peaks.

## S5. Solvent viscosity data

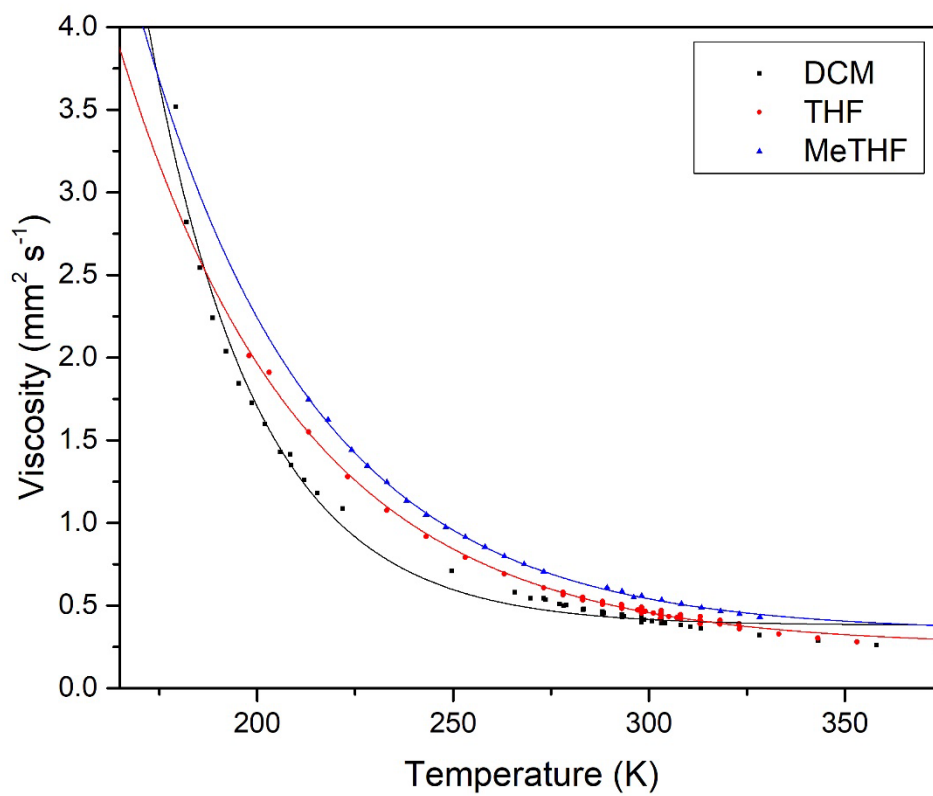

**Figure S28.** Plot of viscosity vs. temperature for DCM, THF and MeTHF. Data obtained from Wohlfarth and Wohlfahrt.<sup>S8</sup>

## S6. Thermodynamic Parameter Calculations

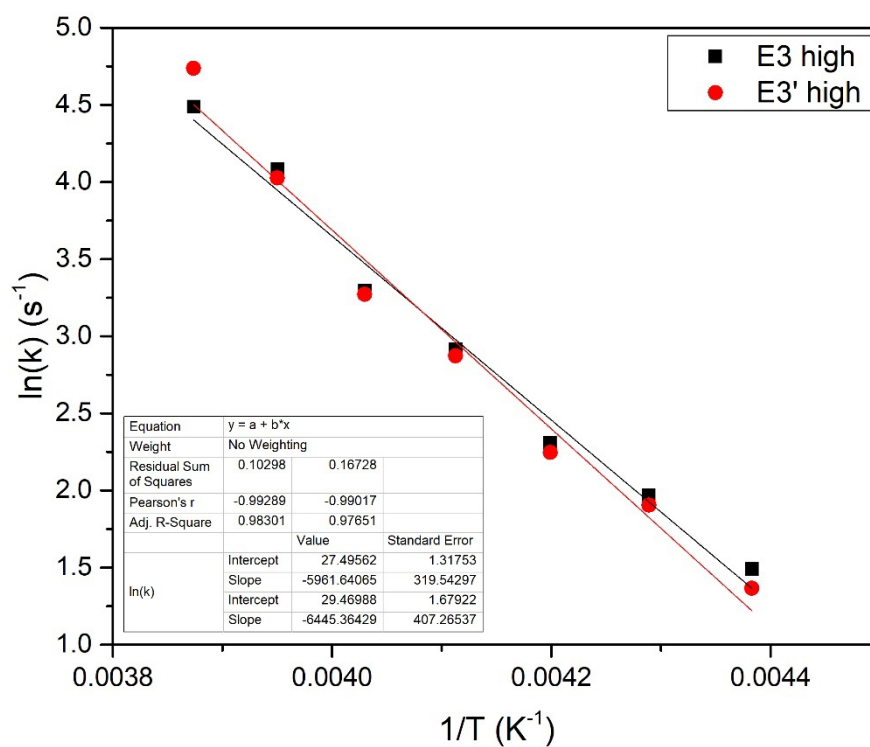

**Figure S29.** Arrhenius plot of the high  $E_a$  region for **1** recorded in THF- $d_8$  using the E3 and E3' NMR signals.

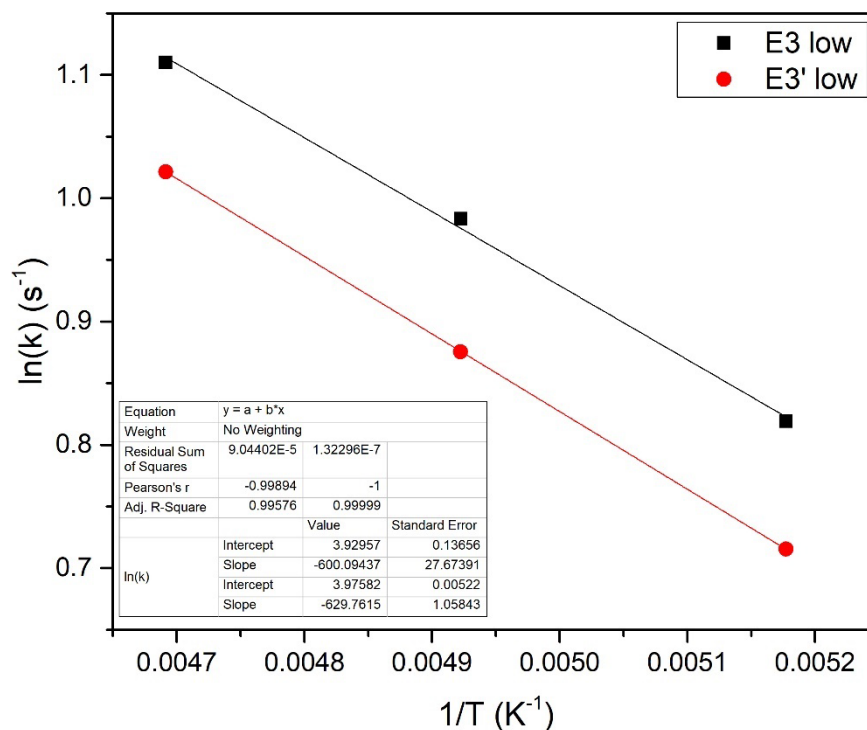

**Figure S30.** Arrhenius plot of the low  $E_a$  region for **1** recorded in THF- $d_8$  using the E3 and E3' NMR signals.

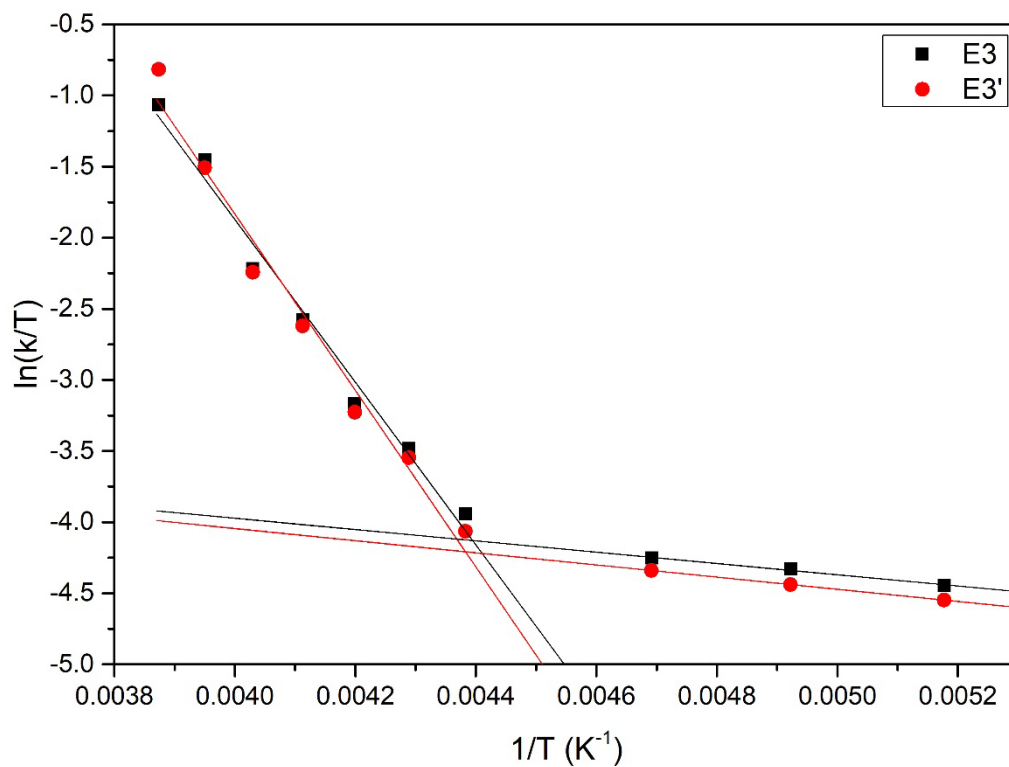

Figure S31. Eyring plot of **1** recorded in THF-d<sub>8</sub> using the E3 and E3' NMR signals.

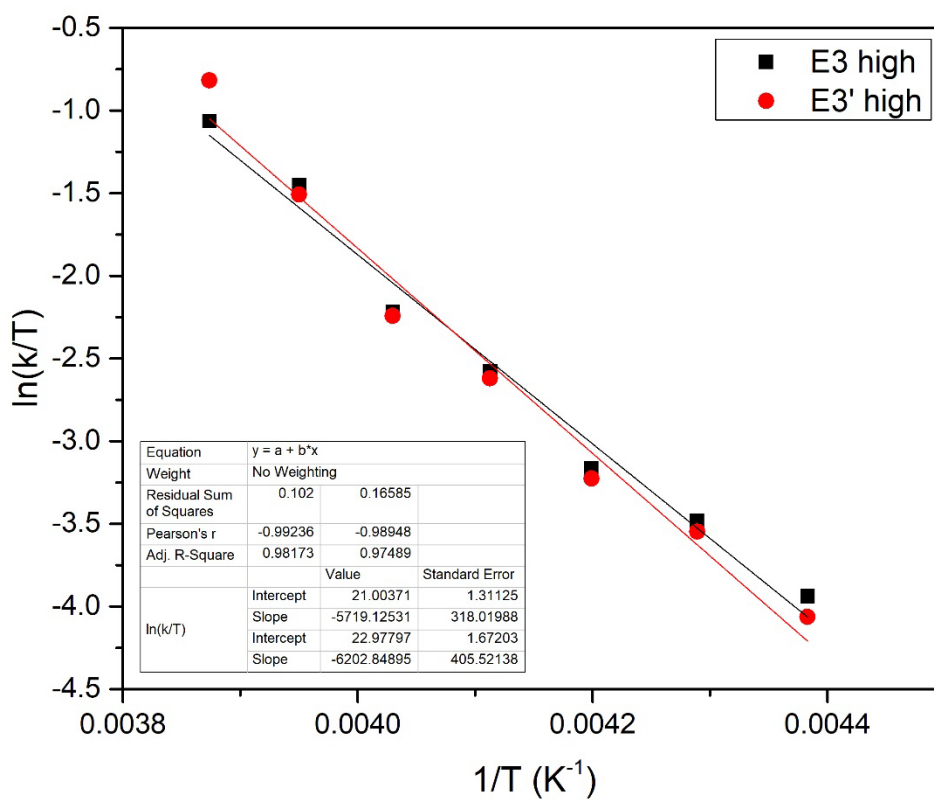

Figure S32. Eyring plot of the high E<sub>a</sub> region for **1** recorded in THF-d<sub>8</sub> using the E3 and E3' NMR signals.

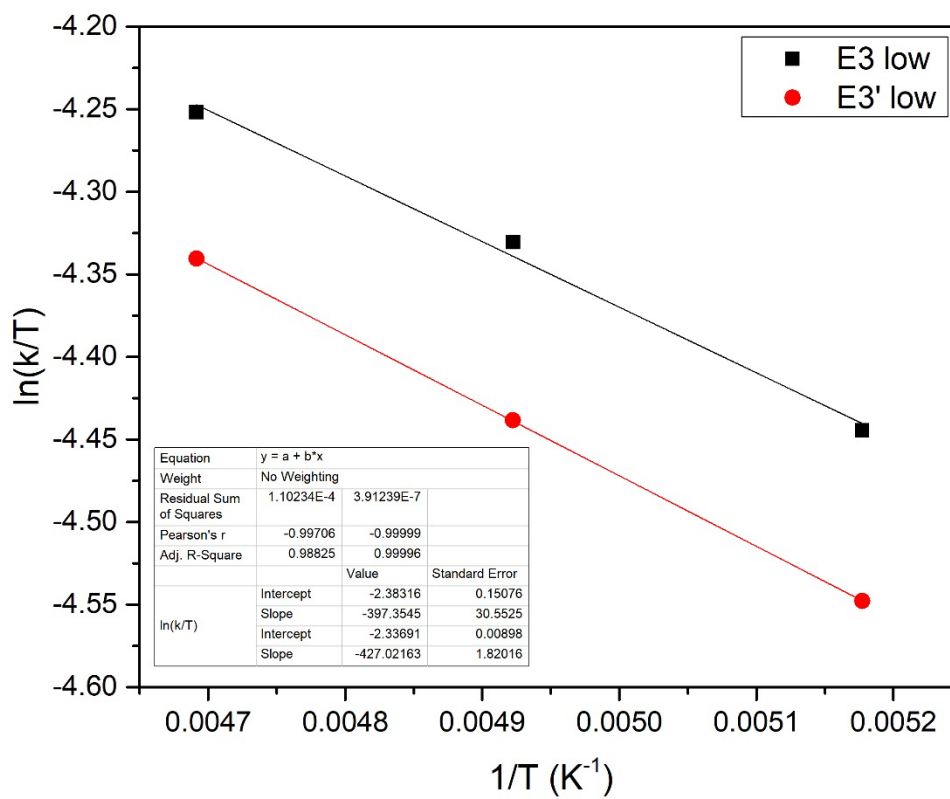

**Figure S33.** Eyring plot of the low  $E_a$  region for **1** recorded in THF- $d_8$  using the E3 and E3' NMR signals.

## S7. Cyclic Voltammetry

Cyclic (CV) and square wave voltammetry (SWV) of the iridium complexes **1-3** were carried out in dichloromethane (DCM) solutions containing a 0.1 M supporting electrolyte (tetrabutylammonium hexafluorophosphate, TBAPF<sub>6</sub>) using a AutoLab 30 potentiostat with platinum working, platinum counter and platinum pseudo reference electrodes with a scan rate of 100 mV s<sup>-1</sup>. The ferrocene/ferrocenium couple (FcH<sup>+</sup>/FcH) was employed as the internal reference.

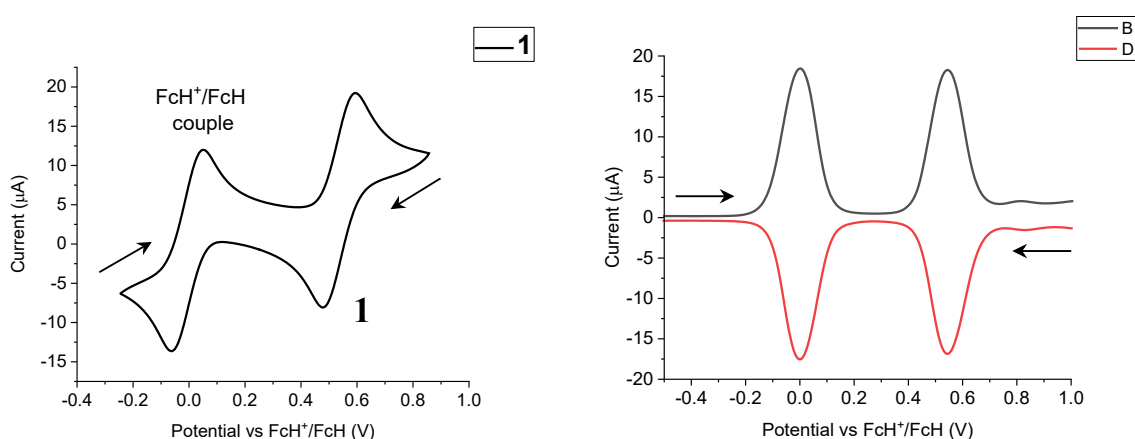

**Figure S34.** CV (left) and SWV (right) traces for **1**.

The electrochemical behaviours are identical for complexes **1-3** where each displays a single reversible oxidation wave attributed to the Ir(III)/Ir(IV) couple at 0.54 V with respect to the FcH<sup>+</sup>/FcH couple at 0.00 V. The unsubstituted iridium complex Ir(ppy)<sub>2</sub>(py)Cl (**D**) was reported<sup>S7</sup> to have an oxidation potential at 0.54 V thus the ethynyl substitution in **1-3** had no impact on the oxidation potential with the substituent being some distance away from the iridium redox centre.



## S8. Photophysical Measurements

Instrumentation: Unless specified, all photophysical measurements of **1**, **2**, and **3** were performed using dry DCM as the solvent. The UV-Visible spectra were measured on a Unicam UV2-100 spectrometer operated with the Unicam Vison software in quartz cuvettes with path length  $l = 1$  cm.

Excitation and emission photoluminescence spectra were recorded on a Horiba Jobin Yvon SPEX Fluorolog 3-22 spectrofluorometer. Samples were degassed by repeated freeze-pump-thaw cycles using a turbomolecular pump until the pressure was stable in quartz cuvettes,  $l = 1$  cm. The solutions had absorbance below 0.15 to minimise inner filter effects.  $T_1$  energies were determined from the highest energy onsets of the emission spectra in MeTHF at 80 K.

Photoluminescence quantum yields (PLQYs) were measured in DCM following our previously reported method (see below).<sup>S9</sup> Quinine sulfate in 0.1 M H<sub>2</sub>SO<sub>4</sub> ( $\Phi_F$ : 0.546)<sup>S10</sup> as the reference, the emission spectra of quinine sulfate were collected by exciting the samples at 360 nm. The PLQY of each complex was measured in duplicate and determined by the following method:

1. The UV-vis absorbance spectrum was recorded in quartz cuvette with path length  $l = 2$  cm (to improve spectrum signal-to-noise), recording the absorbance at the excitation wavelength.
2. The same sample solution was transferred to the quartz fluorescence cell (a standard 1 cm cell modified with a Teflon Young's tap) degassed via repeated freeze-pump-thaw cycles before the emission spectrum was recorded.
3. The fully corrected fluorescence spectrum was integrated and the integrated intensity (the area of the fluorescence spectrum) was recorded.
4. Steps 1 to 3 were repeated for five additional solutions with increasing concentrations (with absorbance ranging from 0.02 to 0.1).
5. The integrated fluorescence intensity was plotted versus absorbance, which resulted a linear plot with gradient  $X$  ( $Grad_x$ ).
6. Steps 1, 3, 4 and 5 were repeated for the chosen standard (quinine sulfate).

7. Fluorescence quantum yield for each complex was calculated using the following equation

$$\Phi_X = \Phi_{ST} \left( \frac{Grad_X}{Grad_{ST}} \right) \left( \frac{\eta^2_X}{\eta^2_{ST}} \right)$$

Where ST and X denote standard and the measured complex,  $\Phi$  is the fluorescence quantum yield, Grad the gradient from the plot of integrated fluorescence intensity vs. absorbance, and  $\eta$  the refractive index of the solvent.

Emission lifetimes were determined by using a custom spectrometer; measured by time-correlated single photon counting (TCSPC) using a pulsed diode laser (371 nm), made by IBH Ltd, running at 1 MHz. The fluorescence emission was collected at right angles to the excitation source. The emission wavelength was selected using a Horiba Jobin Yvon Triax 190 monochromator and detected by a cooled IBH TBX-04 PMT. Timing was achieved using an Ortec 567 time-to-amplitude converter and an E. G. & G Trumpcard pulse height analyser (PHA), and data was recorded using Maestro (ver.510) software. The data were transferred to a PC and analysed using non-linear regression to a single exponential decay, and the quality of fit established by reduced  $\chi^2$  and random residuals. The samples were degassed by repeated freeze-pump-thaw cycles in duplicates. The decay data were fitted to a single exponential function. Low temperature emission spectra and lifetime data were measured in a DN1704 optical cryostat (Oxford Instruments) with a ITC601 temperature controller (Oxford Instruments).

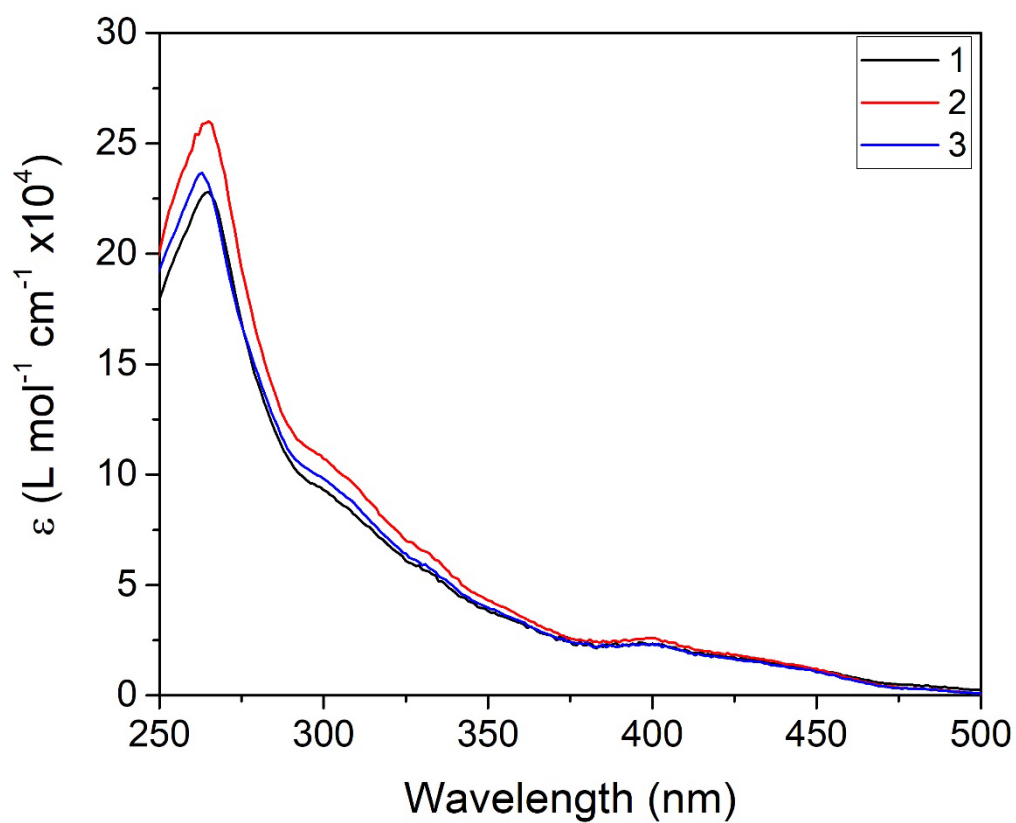

**Figure S35.** UV-Visible electronic absorbance spectra of **1**, **2** and **3** recorded in DCM.

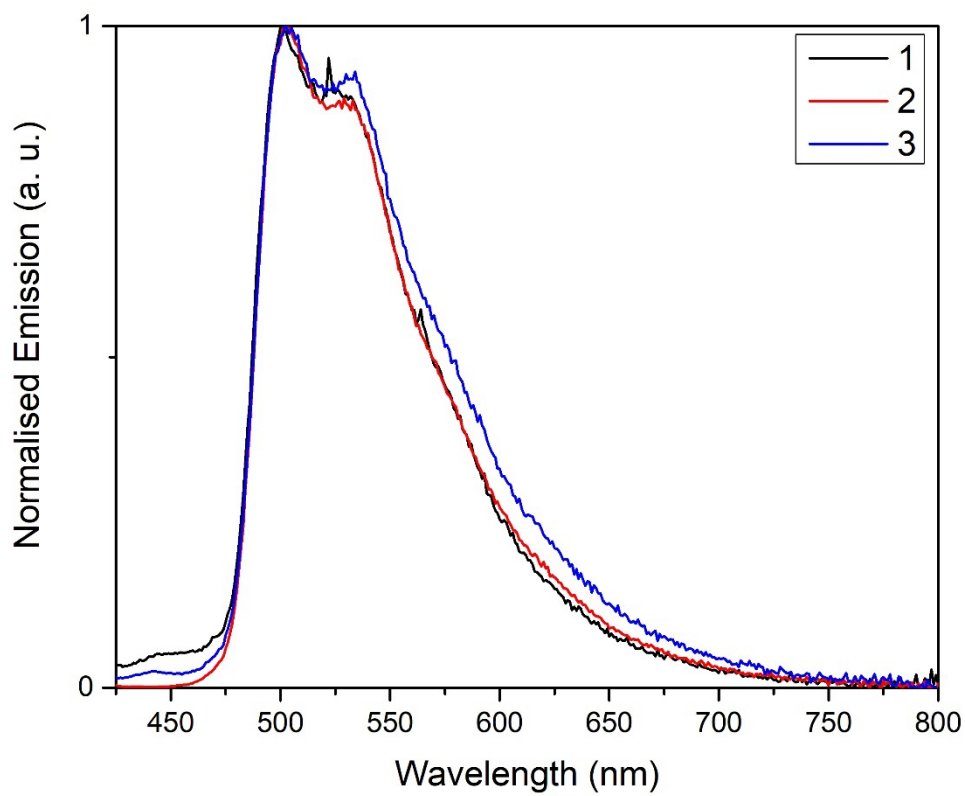

**Figure S36.** Emission spectra of **1**, **2**, and **3** recorded in DCM at room temperature.

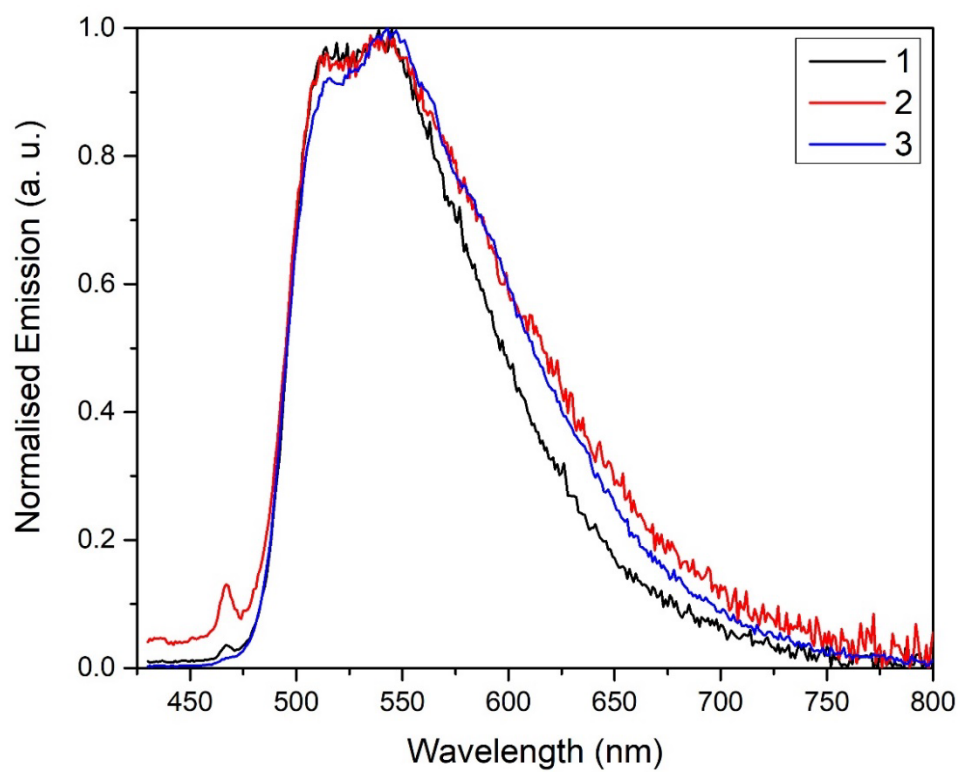

**Figure S37.** Emission spectra of **1**, **2**, and **3** recorded in MeTHF at room temperature.

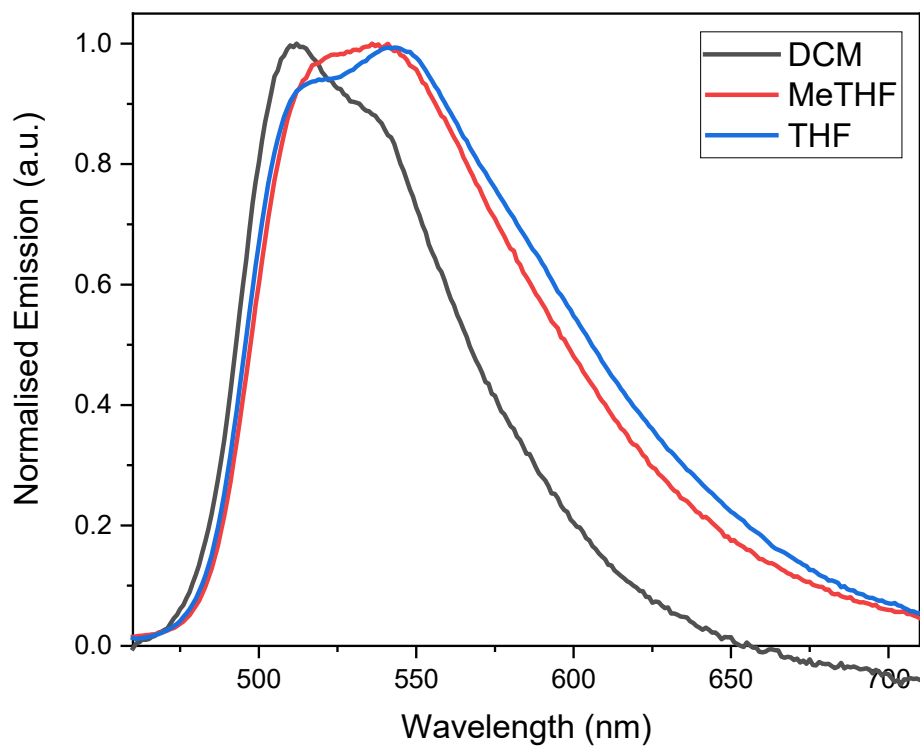

**Figure S38.** Room temperature emission spectra of **1** recorded in DCM, MeTHF and THF.

**Table S5.** Photophysical data for complexes **1-3**.

| Compound | $\lambda_{\text{Emission}}$<br>(nm) |          | Lifetime <sup>i</sup><br>( $\tau$ , $\mu\text{s}$ ) | $T_1^i$<br>(eV) | $k_r^i$<br>( $10^5 \text{ s}^{-1}$ ) | $k_{nr}^i$<br>( $10^7 \text{ s}^{-1}$ ) | PLQY <sup>i</sup><br>$\Phi$ | Pure<br>radiative<br>lifetime<br>( $\tau_0$ , $\mu\text{s}$ ) |
|----------|-------------------------------------|----------|-----------------------------------------------------|-----------------|--------------------------------------|-----------------------------------------|-----------------------------|---------------------------------------------------------------|
|          | DCM                                 | MeTHF    |                                                     |                 |                                      |                                         |                             |                                                               |
| <b>1</b> | 501, 525                            | 514, 540 | 0.16                                                | 2.62            | 3.54                                 | 0.58                                    | 0.057                       | 2.82                                                          |
| <b>2</b> | 501, 529                            | 514, 540 | 0.21                                                | 2.59            | 2.18                                 | 0.43                                    | 0.047                       | 4.58                                                          |
| <b>3</b> | 504, 532                            | 515, 542 | 0.23                                                | 2.59            | 3.22                                 | 0.39                                    | 0.075                       | 3.09                                                          |

<sup>i</sup>Recorded in DCM

### Variable Temperature emission

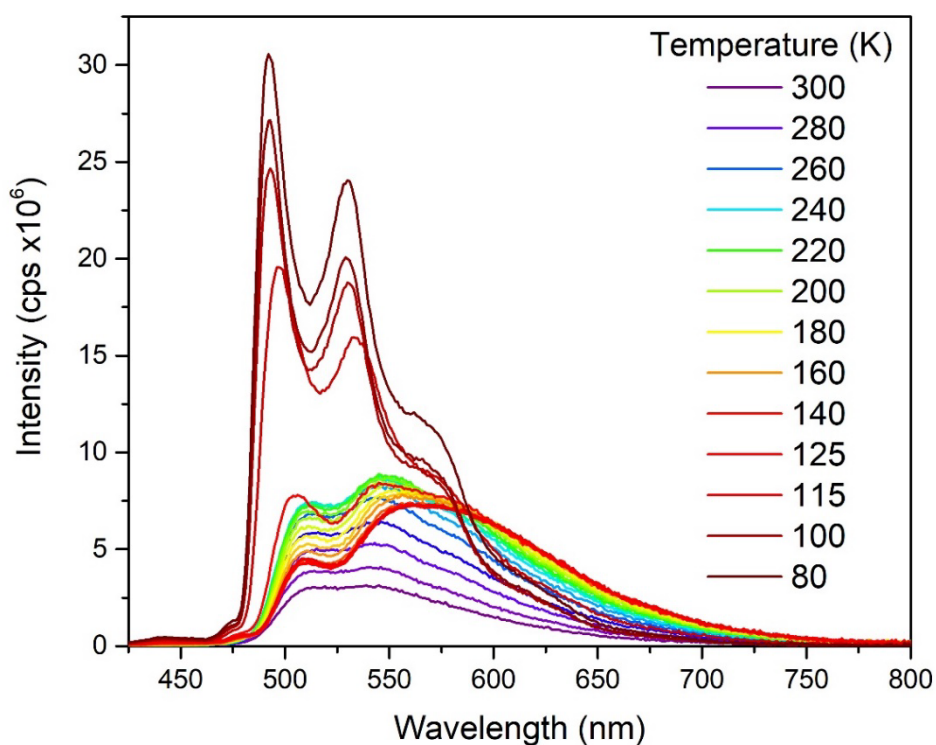

**Figure S39.** Variable temperature (80 – 300 K) emission spectra of 1 recorded in MeTHF.

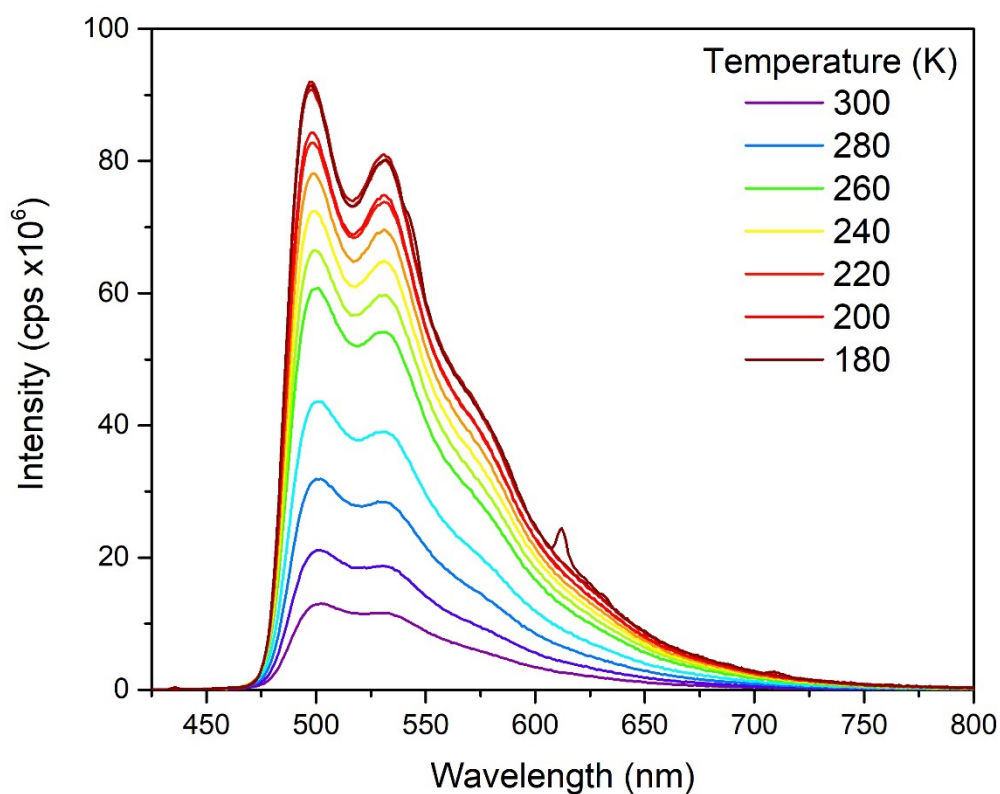

**Figure S40.** Variable temperature (180 – 300 K) emission spectra of 2 recorded in DCM. Note: the increase of vibronic band intensity as the temperature decreases.

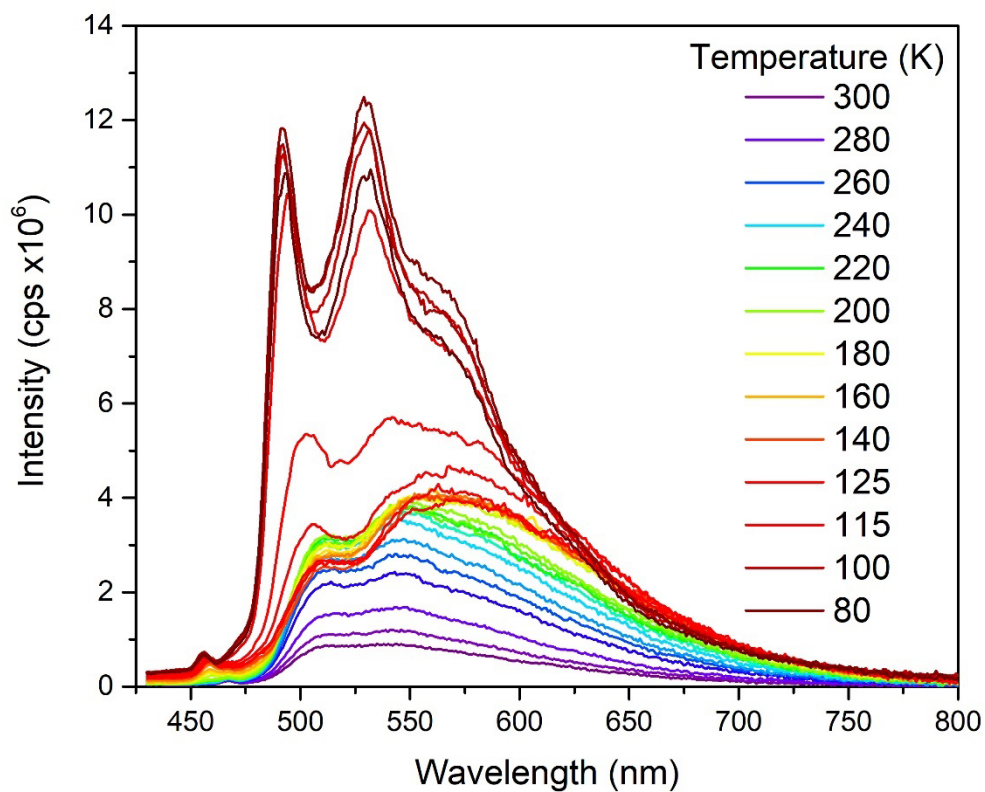

**Figure S41.** Variable temperature (80 – 300 K) emission spectra of **2** recorded in MeTHF.

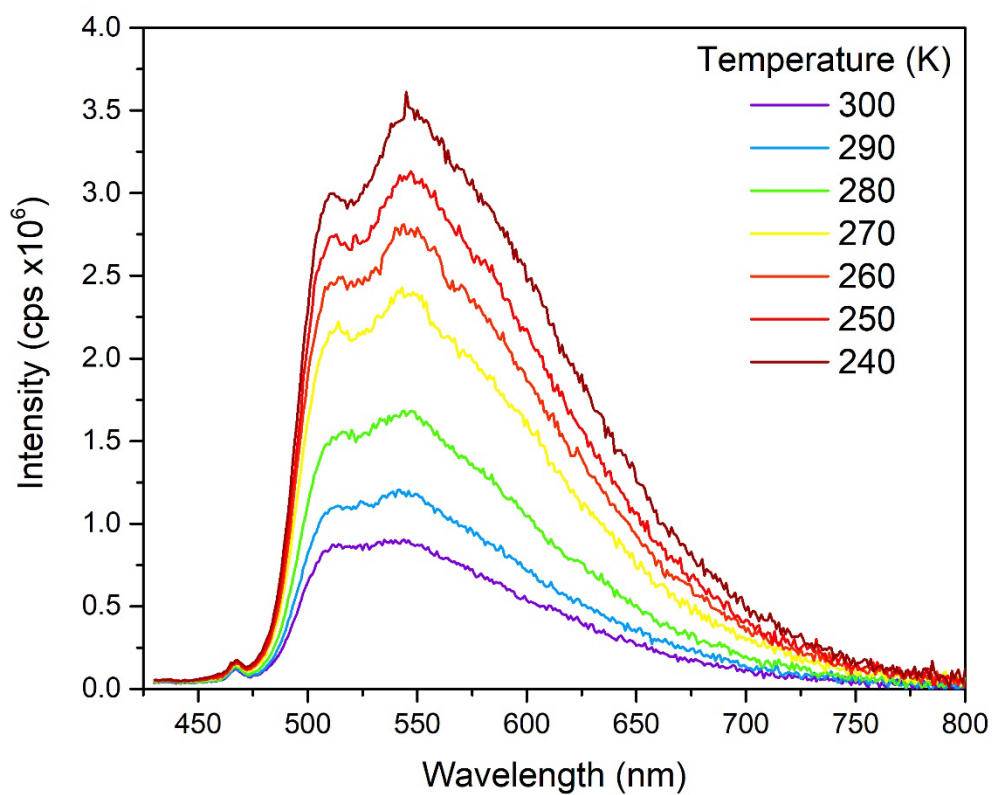

**Figure S42.** Variable temperature (240 – 300 K) emission spectra of **2** recorded in MeTHF. Note: the increase of vibronic band intensity as the temperature decreases.

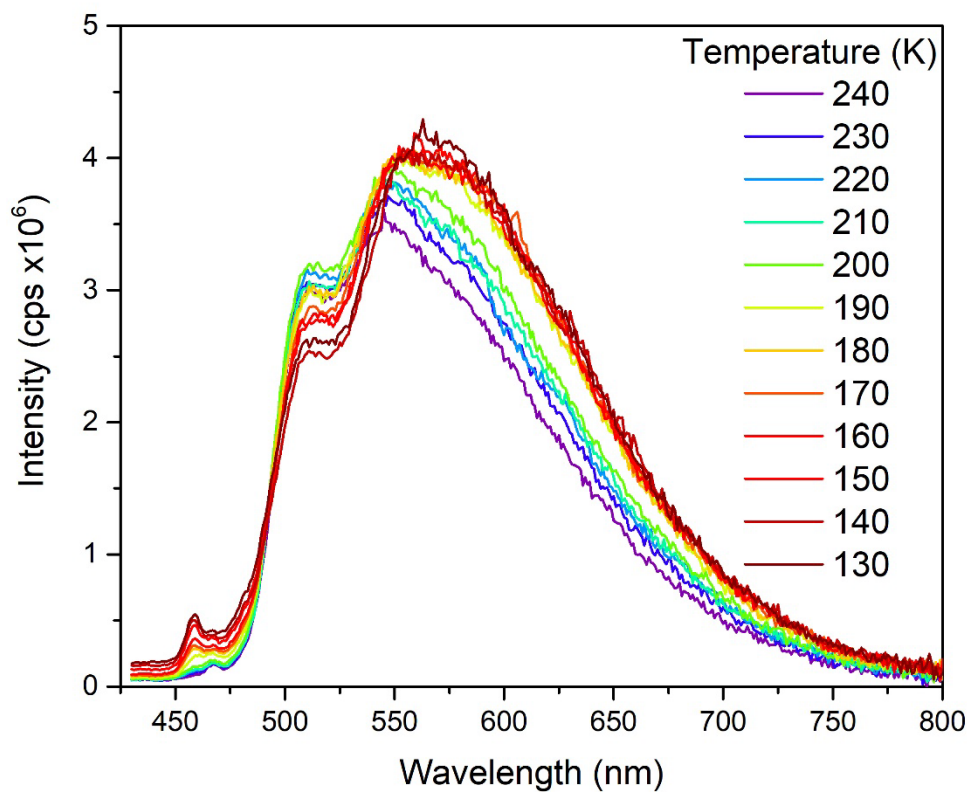

**Figure S43.** Variable temperature (130 – 240 K) emission spectra of **2** recorded in MeTHF. Note: the decrease of vibronic band intensity as the temperature decreases.

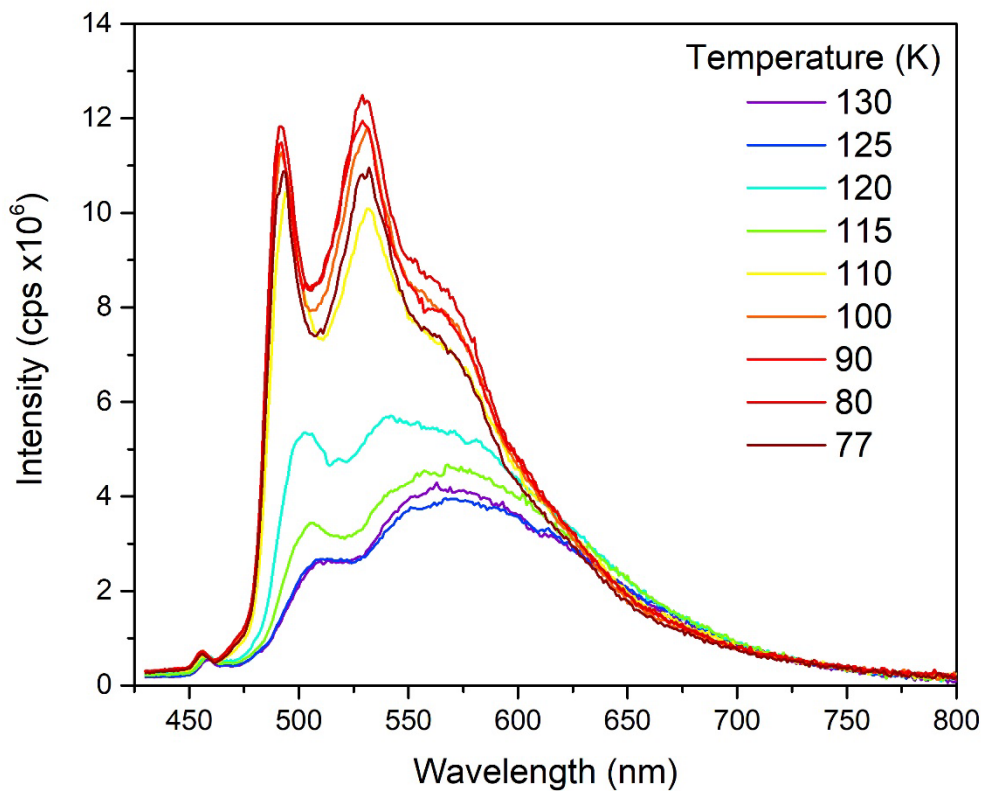

**Figure S44.** Variable temperature (77 – 130 K) emission spectra of **2** recorded in MeTHF. Note: the increase of vibronic band intensity as the temperature decreases.



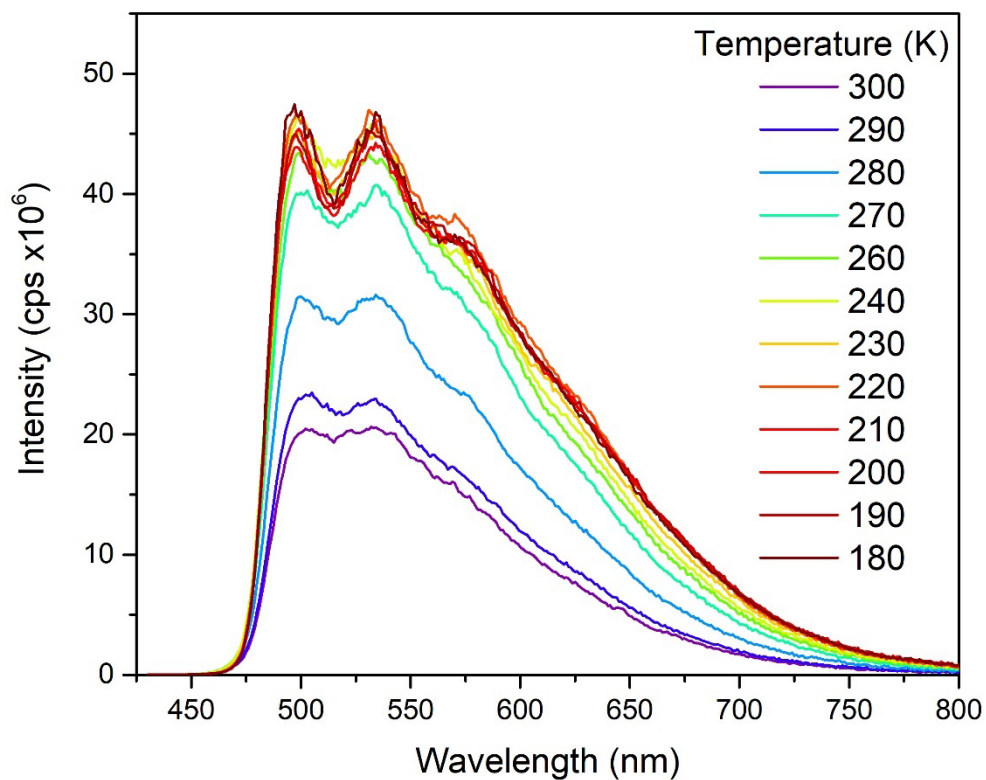

**Figure S45.** Variable temperature (180 – 300 K) emission spectra of **3** recorded in DCM. Note: the increase of vibronic band intensity as the temperature decreases.

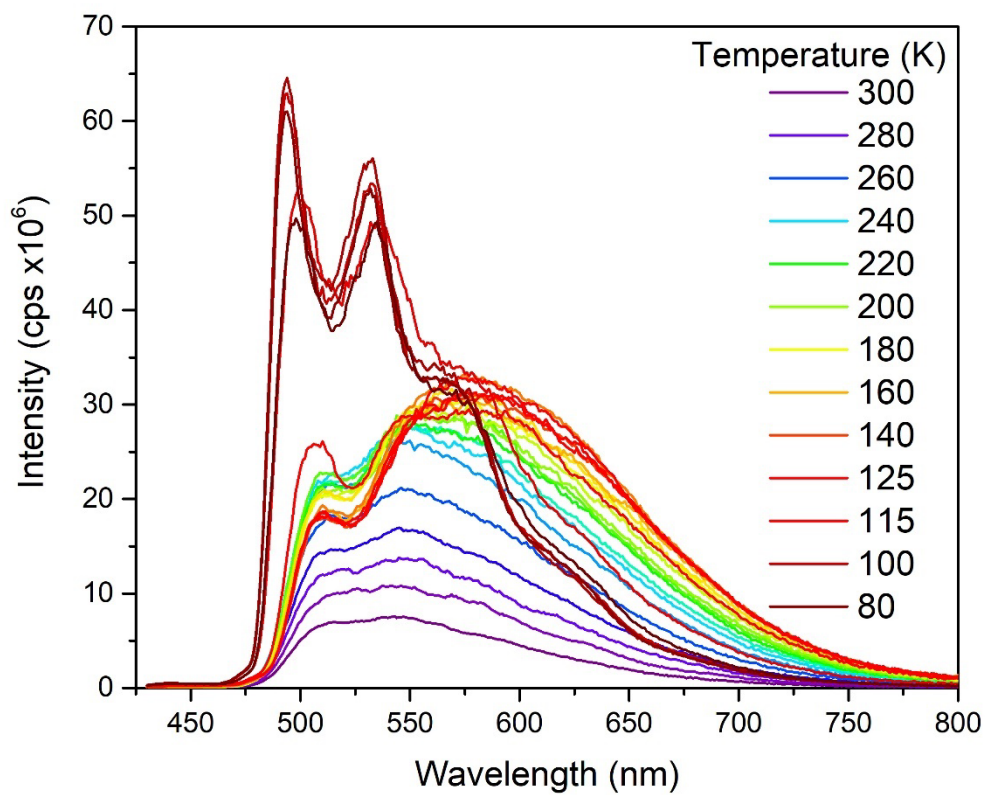

**Figure S46.** Variable temperature (80 – 300 K) emission spectra of **3** recorded in MeTHF.

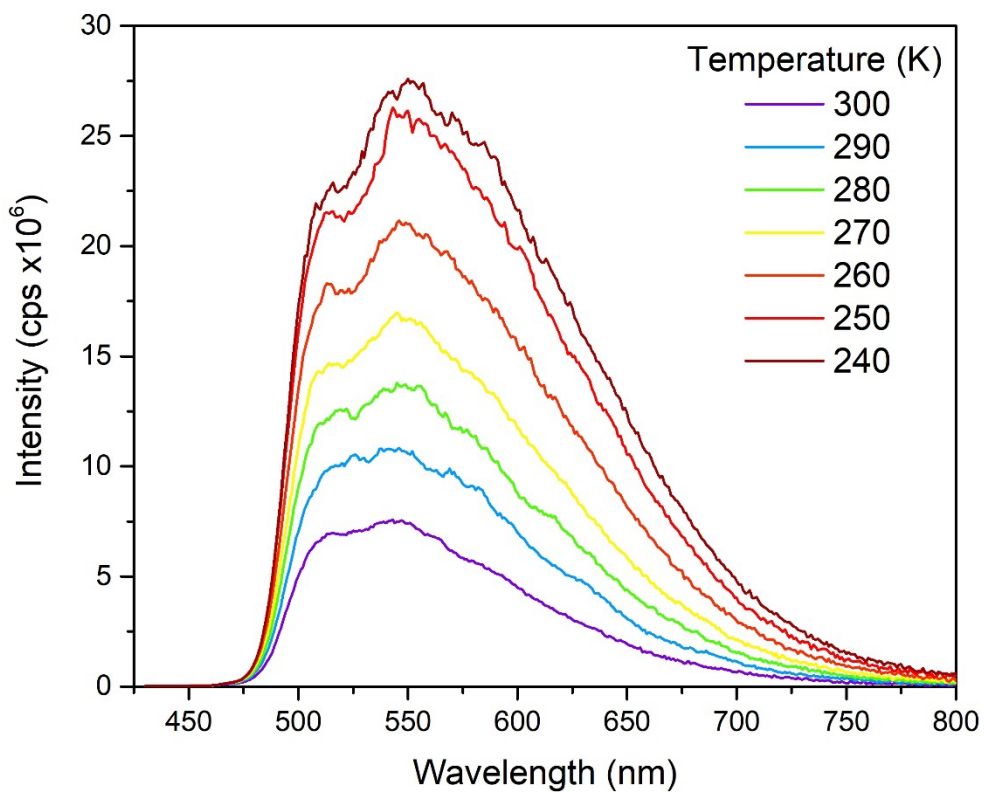

**Figure S47.** Variable temperature (240 – 300 K) emission spectra of **3** recorded in MeTHF. Note: the increase of vibronic band intensity as the temperature decreases.

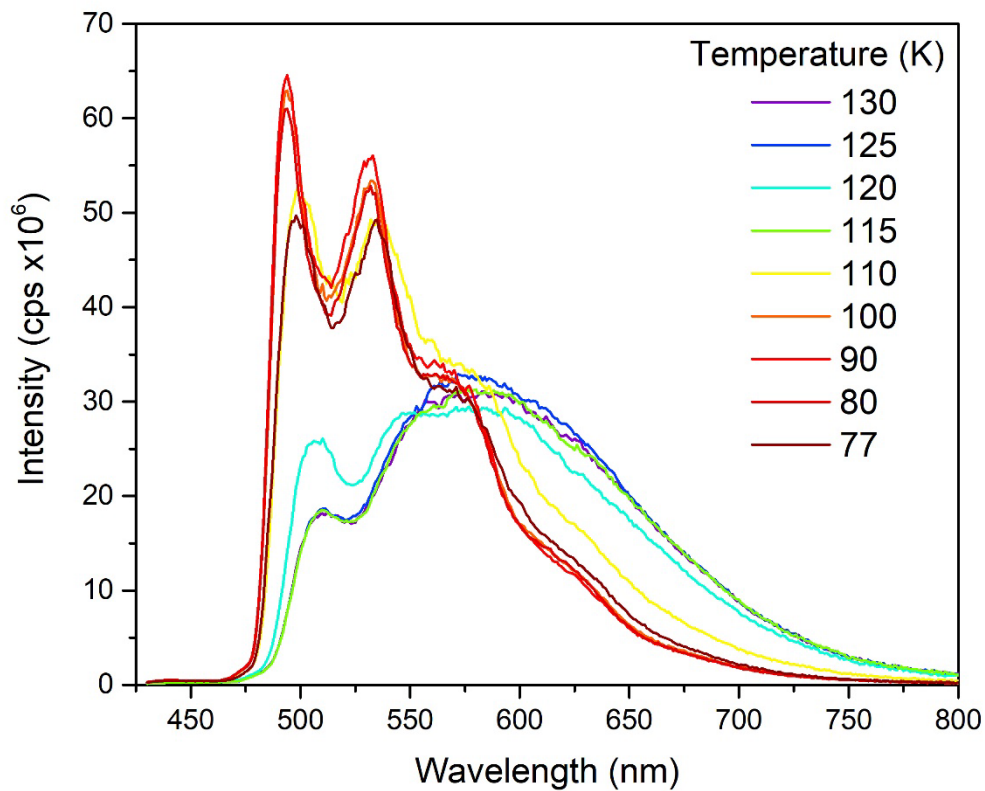

**Figure S48.** Variable temperature (77 – 130 K) emission spectra of **3** recorded in MeTHF. Note: the increase of vibronic band intensity as the temperature decreases.

## S9. Computations

All hybrid-DFT calculations were carried out with the Gaussian 16 package.<sup>S11</sup> The model chemistry B3LYP<sup>S12</sup> with the pseudopotential (LANL2DZ)<sup>S13</sup> for iridium and 3-21G\* basis set<sup>S14</sup> for all other atoms was initially selected on the basis of good agreements between experimental and computed data in related iridium complexes elsewhere.<sup>S15</sup> The IEF-PCM solvation model<sup>S16</sup> was applied using tetrahydrofuran (THF) as solvent.

The Ir-N(pyridine) bond rotation conformers in **1** were examined by fixing the Cl-Ir-N(py)-C(py) dihedral angle at 1° intervals in clockwise (and anticlockwise) steps and then optimising each geometry at the ground state ( $S_0$ ). Two minima (Min1 and Min2) and two rotational barriers (transition states, TS1 and TS2) were predicted by the VT NMR data for **1**. However, the expected second rotation barrier TS2 and the second minimum Min2 were not located at B3LYP/LANL2DZ:3-21G\*/IEF-PCM which indicated that the optimised geometry was different to the experimental geometry at this model chemistry. Other model chemistries were then explored for a better agreement between experimental and optimised geometries with selected bond values listed in Table S6. The agreement between the experimental X-ray determined geometry and the optimised geometry with the hybrid-DFT functional PBE0<sup>17</sup> (instead of B3LYP) is excellent. The PBE0 functional was also preferred over the B3LYP functional in cationic iridium complex  $[\text{Ir}(\text{N}^{\wedge}\text{C})_2(\text{N}^{\wedge}\text{N})]^+$  systems elsewhere recently as the latter functional gave barrier energies that are too low.<sup>S18</sup> It is noted here that dual phosphorescence of cationic iridium complex  $[\text{Ir}(\text{N}^{\wedge}\text{C})_2(\text{N}^{\wedge}\text{N})]^+$  systems have been reported.<sup>S19</sup> The two emission bands are assigned from  $^3\text{LC}$  and  $^3\text{MLCT}$  excited states instead in these cationic systems.

The rotation energy plot at PBE0/LANL2DZ:3-21G\*/IEF-PCM in Figure 3 shows the two minima (Min1 and Min2) and two rotational barriers (TS1 and TS2) in agreement with VT NMR data for **1**. Full geometry optimisations of Min1 and Min2 were confirmed as true minima with no imaginary frequencies. Transition state (TS) geometries, TS1 and TS2, were also located (using the OPT=QST3 command) and each TS contained one imaginary frequency from frequency calculations. The rotational conformers in **1** were also explored at the triplet excited state ( $T_1$ ) at PBE0/LANL2DZ:3-21G\*/IEF-PCM (Figure 6) and at B3LYP/LANL2DZ:3-21G\*/IEF-PCM where Min1, Min2, TS1 and TS2 conformers of **1** at  $T_1$  were present at both model chemistries.

The rotational conformer procedures for  $S_0$  and  $T_1$  states were applied at PBE0/LANL2DZ:3-21G\*/IEF-PCM and B3LYP/LANL2DZ:3-21G\*/IEF-PCM to the simpler complex **D** where no Min2 and TS2 geometries were located. These findings suggest that the second rotational barrier TS2 and the second minimum Min2 do not exist for complex **D**. Excited state geometries of the Min2 conformer responsible for broad emissions were found for complexes **A** and **C** but not for complexes **B** and **D**.

Simulated emission spectra for related iridium complexes were recently shown to be in good agreement with experimental emission data.<sup>S20</sup> Some AH calculations did not proceed for some complexes in the recent study so VH calculations were carried out instead. Adiabatic (AH) and vertical Hessian (VH) methods at B3LYP were employed with a fixed FWHH broadening value of 1000 cm<sup>-1</sup>. Here, AH for **1** at B3LYP/LANL2DZ:3-21G\*/IEF-PCM gave the desired simulated vibronic spectra. The FWHH broadening value applied for the simulated vibronic spectra was scaled according to the selected temperature T in K with the equation  $\text{FWHH}(\text{cm}^{-1}) = 600 \text{ cm}^{-1} + 2T$ . For example at T = 130 K,  $\text{FWHH} = 600 + 260 = 860 \text{ cm}^{-1}$ . For the simulated broad emission spectra of **1** at B3LYP/LANL2DZ:3-21G\*/IEF-PCM, the AH calculation did not proceed thus the VH calculation was employed instead along with a fixed FWHH broadening value of 3000 cm<sup>-1</sup> at all temperatures in accord with observed broad emission bands from deconvolution analyses of the observed dual emissions for **1**. The simulated emission spectra were analysed with GaussView<sup>S21</sup> and the vibration figures were generated using Gabedit.<sup>S22</sup>

The natural transition orbitals (NTOs) for T<sub>1</sub> conformers of **1** were obtained by time-dependent DFT (TD-DFT) calculations at B3LYP/LANL2DZ:3-21G\*/IEF-PCM. NTO figures and orbital contributions for **1** were generated with the aid of Gabedit<sup>S20</sup> and Multiwfn<sup>S23</sup> packages, respectively.

**Table S6.** Comparison of key bond parameters in optimised and experimental geometries for **1**. All optimised geometries contain the Min1 conformation at the ground state (S<sub>0</sub>).

| Functional/<br>pseudopotential:basis | Ir-Cl | Ir-C(ppy)<br>Ring A | Ir-N(ppy)<br>Ring B | Ir-C(ppy)<br>Ring C | Ir-N(ppy)<br>Ring D | Ir-N(py)<br>Ring E |
|--------------------------------------|-------|---------------------|---------------------|---------------------|---------------------|--------------------|
| BP86/ LANL2DZ:3-21G*                 | 2.536 | 2.012               | 2.053               | 2.018               | 2.048               | 2.202              |
| CAM/ LANL2DZ:3-21G*                  | 2.525 | 2.009               | 2.059               | 2.015               | 2.056               | 2.203              |
| M06/ LANL2DZ:3-21G*                  | 2.533 | 2.001               | 2.056               | 2.009               | 2.050               | 2.203              |
| M062X/ LANL2DZ:3-21G*                | 2.560 | 1.987               | 2.063               | 1.995               | 2.057               | 2.224              |
| B3LYP/SDD                            | 2.628 | 2.020               | 2.077               | 2.030               | 2.076               | 2.237              |
| B3LYP/LANL2DZ                        | 2.622 | 2.016               | 2.069               | 2.025               | 2.068               | 2.224              |
| B3LYP/LANL2DZ:6-31G(d)               | 2.589 | 2.014               | 2.081               | 2.014               | 2.076               | 2.290              |
| B3LYP/LANL2DZ:3-21G*                 | 2.559 | 2.017               | 2.065               | 2.022               | 2.063               | 2.228              |
| PBE0/SDD                             | 2.575 | 2.000               | 2.052               | 2.013               | 2.052               | 2.192              |
| PBE0/LANL2DZ                         | 2.567 | 1.998               | 2.045               | 2.009               | 2.043               | 2.176              |
| PBE0/LANL2DZ:6-31G(d)                | 2.529 | 1.995               | 2.055               | 1.998               | 2.050               | 2.232              |
| PBE0/LANL2DZ:3-21G*                  | 2.502 | 1.996               | 2.041               | 2.003               | 2.037               | 2.175              |
| Experimental                         | 2.470 | 2.000               | 2.043               | 1.993               | 2.033               | 2.178              |

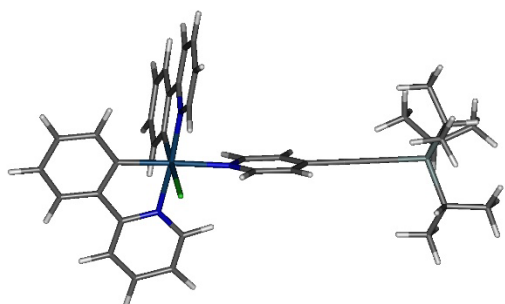

S<sub>0</sub> Min1

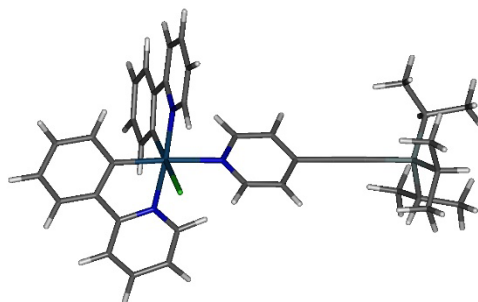

S<sub>0</sub> Min2

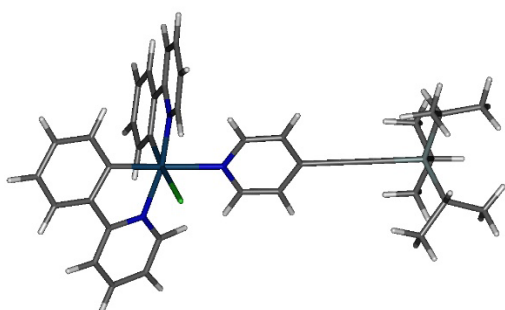

S<sub>0</sub> TS1

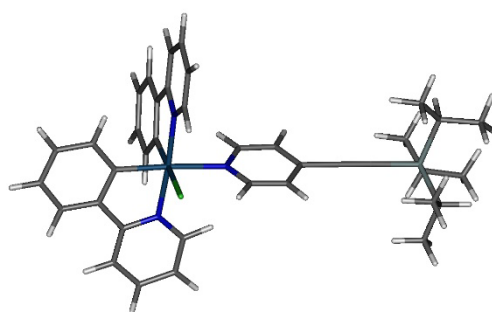

S<sub>0</sub> TS2

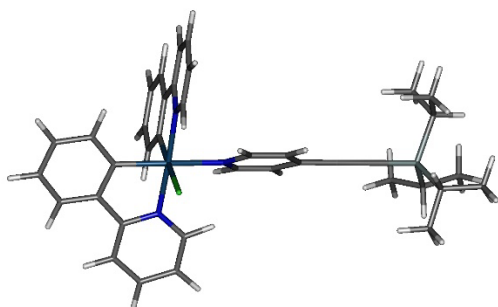

T<sub>1</sub> Min1

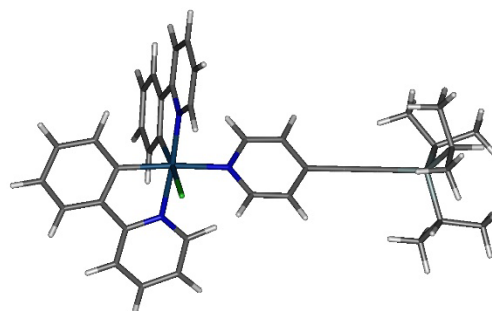

T<sub>1</sub> Min2

**Figure S49.** Optimised geometries for **1**.

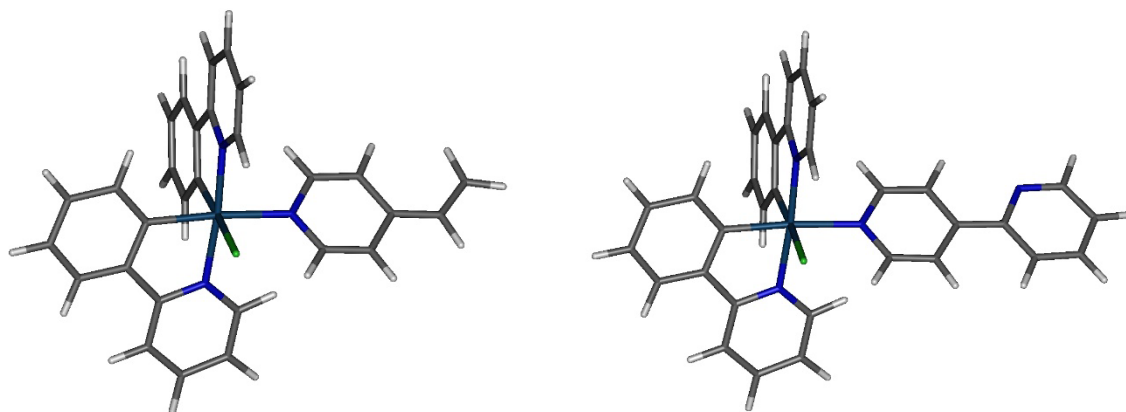

**Figure S50.** Optimised  $T_1$  Min2 geometries for **A** and **C**. Broad phosphorescent emissions are expected from these conformers for complexes **A** and **C**. No  $T_1$  Min2 geometries could be located for **B** and **D**.

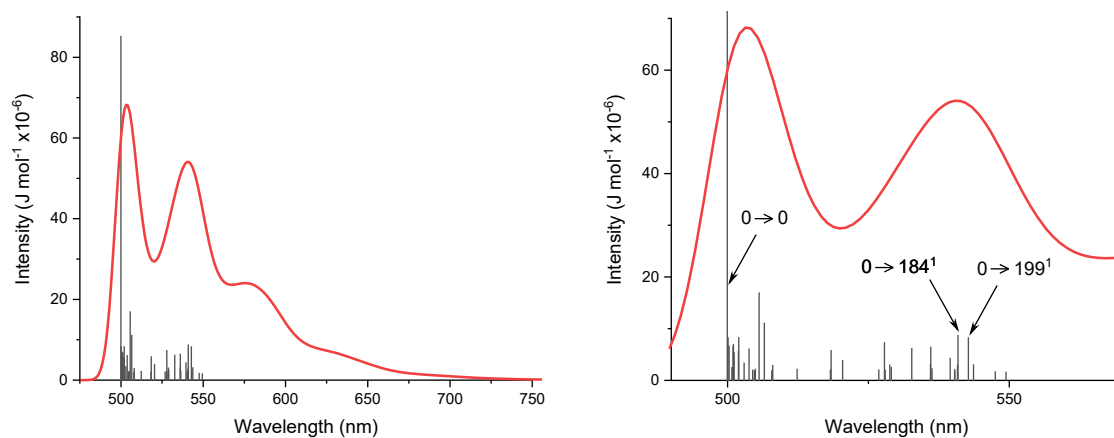

**Figure S51.** Calculated vibronic spectrum for Min1 conformer of **1**  $S_0 \leftarrow T_1$  (Adiabatic Hessian, AH) at B3LYP/LANL2DZ:3-21G\*/IEF-PCM(THF). Temperature = 0 K. FWHH =  $600 \text{ cm}^{-1}$ .

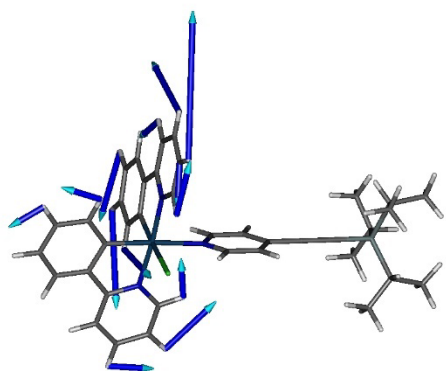

Vibration mode 184; 1495  $\text{cm}^{-1}$

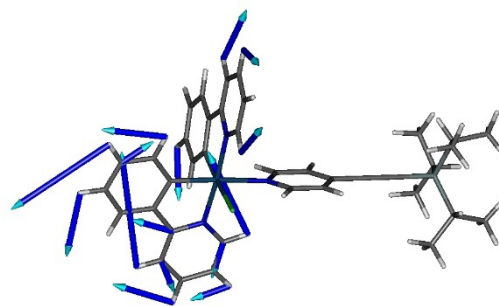

Vibration mode 199; 1511  $\text{cm}^{-1}$

**Figure S52.** Vibrations mainly responsible for the observed vibronic emission bands after 0-0 band at 510 nm.

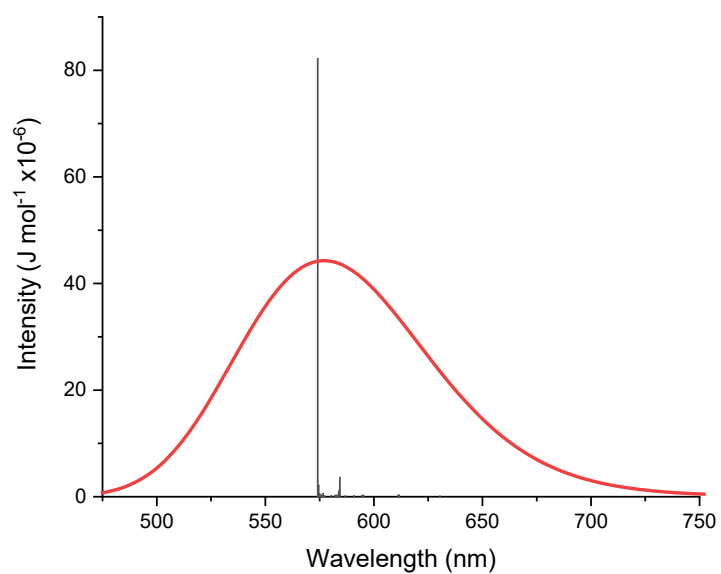

**Figure S53.** Calculated vibronic spectrum for Min2 conformer of  $1 S_0 \leftarrow T_1$  (Vertical Hessian, VH) at B3LYP/LANL2DZ:3-21G\*/IEF-PCM(THF). Temperature = 0 K. FWHH = 3000  $\text{cm}^{-1}$ .

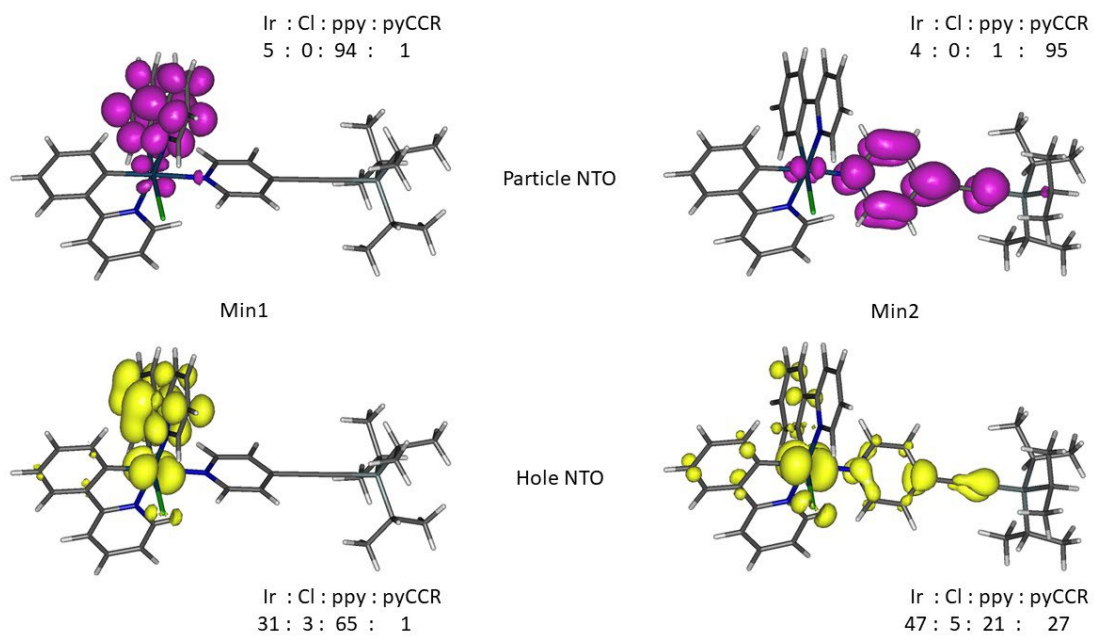

**Figure S54.** Particle (purple) and hole (yellow) NTOs for T<sub>1</sub> conformers (Min1 and Min2) of **1** with orbital contributions (%).



## S10. Cartesian coordinates

Optimised geometries of **1**

So Min1

E(PBE0/LANL2DZ:3-21G\*/PCM-THF) = -2476.722271 a.u.

G(PBE0/LANL2DZ:3-21G\*/PCM-THF) = -2476.095093 a.u.

NIMAG = 0

|    |           |           |           |    |           |           |           |
|----|-----------|-----------|-----------|----|-----------|-----------|-----------|
| Ir | -2.427907 | 0.073614  | -0.353547 | C  | 1.859412  | 0.181426  | -1.433047 |
| N  | -2.838411 | 2.023013  | 0.070529  | H  | -0.096519 | 0.157499  | -2.361381 |
| N  | -2.145679 | -1.920639 | -0.683150 | C  | 1.781473  | 0.333077  | 0.965226  |
| C  | -1.900023 | 2.983856  | 0.239151  | H  | -0.216755 | 0.356305  | 1.772029  |
| C  | -2.018442 | -2.476744 | -1.910612 | C  | 2.547283  | 0.256852  | -0.210870 |
| H  | -0.870709 | 2.667295  | 0.148530  | H  | 2.404497  | 0.126413  | -2.366419 |
| H  | -2.095110 | -1.784103 | -2.740057 | H  | 2.265496  | 0.394817  | 1.931277  |
| C  | -2.235979 | 4.300162  | 0.508517  | C  | 3.965457  | 0.255149  | -0.159542 |
| C  | -1.813315 | -3.837735 | -2.074827 | C  | 5.184927  | 0.252384  | -0.103368 |
| C  | -3.586685 | 4.644178  | 0.602715  | Cl | -2.411703 | 0.690078  | -2.777856 |
| C  | -1.736504 | -4.650586 | -0.941836 | N  | -0.260358 | 0.245356  | -0.301856 |
| H  | -3.880809 | 5.666142  | 0.811392  | Si | 7.030468  | 0.241890  | -0.028304 |
| H  | -1.576968 | -5.718031 | -1.040480 | C  | 7.597233  | 1.837479  | -0.876077 |
| C  | -4.550339 | 3.662735  | 0.418958  | H  | 7.154490  | 1.829772  | -1.885509 |
| C  | -1.869255 | -4.078075 | 0.316921  | C  | 7.601394  | -1.272796 | -1.007396 |
| H  | -5.602527 | 3.908197  | 0.478737  | H  | 8.701043  | -1.314990 | -0.937285 |
| H  | -1.815571 | -4.690817 | 1.207291  | C  | 7.556459  | 0.187296  | 1.794579  |
| C  | -4.169666 | 2.344909  | 0.148479  | H  | 7.570335  | 1.231973  | 2.147300  |
| C  | -2.076767 | -2.702195 | 0.440936  | C  | 8.985001  | -0.387247 | 1.952703  |
| C  | -2.638179 | 0.192009  | 2.701479  | H  | 9.286110  | -0.361311 | 3.008885  |
| C  | -5.247219 | -1.124669 | -0.601947 | H  | 9.019798  | -1.432148 | 1.619937  |
| C  | -2.601893 | -0.405055 | 3.962365  | H  | 9.724540  | 0.180502  | 1.375978  |
| C  | -6.637506 | -1.017948 | -0.565824 | C  | 7.211791  | -1.139036 | -2.497393 |
| H  | -2.744161 | 0.204091  | 4.850176  | H  | 7.534403  | -2.029386 | -3.054313 |
| H  | -7.249826 | -1.894672 | -0.756057 | H  | 6.122363  | -1.051625 | -2.603017 |
| C  | -2.387668 | -1.781046 | 4.094906  | H  | 7.675842  | -0.260527 | -2.961850 |
| C  | -7.253399 | 0.207026  | -0.286099 | C  | 9.134751  | 1.893351  | -1.023411 |
| C  | -2.212846 | -2.561369 | 2.957335  | H  | 9.431461  | 2.800955  | -1.566697 |
| C  | -6.469688 | 1.328675  | -0.043189 | H  | 9.617762  | 1.923552  | -0.038540 |
| C  | -2.245667 | -1.966543 | 1.689155  | H  | 9.524226  | 1.026483  | -1.572067 |
| C  | -5.072202 | 1.224185  | -0.079141 | C  | 6.577552  | -0.600749 | 2.693966  |
| C  | -2.455532 | -0.569314 | 1.535922  | H  | 6.908112  | -0.553540 | 3.740703  |
| C  | -4.429499 | -0.009871 | -0.362384 | H  | 5.560682  | -0.197020 | 2.631947  |
| H  | -1.454484 | 5.037595  | 0.637566  | H  | 6.542327  | -1.657083 | 2.400858  |
| H  | -2.361424 | -2.238325 | 5.077775  | C  | 7.088350  | 3.095740  | -0.138940 |
| H  | -2.050579 | -3.629834 | 3.062764  | H  | 7.387729  | 4.002234  | -0.682383 |
| H  | -1.718293 | -4.248484 | -3.071637 | H  | 5.995035  | 3.094262  | -0.048946 |
| H  | -8.334969 | 0.282090  | -0.259249 | H  | 7.517723  | 3.153724  | 0.869647  |
| H  | -6.949175 | 2.279080  | 0.171469  | C  | 7.023603  | -2.584244 | -0.429902 |
| H  | -2.810468 | 1.260990  | 2.623708  | H  | 7.346043  | -3.441128 | -1.037361 |
| H  | -4.794486 | -2.086546 | -0.820756 | H  | 7.355390  | -2.755691 | 0.600779  |
| C  | 0.474198  | 0.181369  | -1.441178 | H  | 5.926340  | -2.556416 | -0.438515 |
| C  | 0.399965  | 0.319620  | 0.883343  |    |           |           |           |

So Min2

E(PBE0/LANL2DZ:3-21G\*/PCM-THF) = -2476.722020 a.u.

G(PBE0/LANL2DZ:3-21G\*/PCM-THF) = -2476.093824 a.u.

NIMAG = 0

|    |           |           |           |    |           |           |           |
|----|-----------|-----------|-----------|----|-----------|-----------|-----------|
| Ir | 2.400428  | -0.061137 | -0.327364 | C  | -1.884742 | -0.825397 | -1.126285 |
| N  | 2.681888  | -2.031686 | 0.118483  | H  | 0.067427  | -1.276847 | -1.943604 |
| N  | 2.267781  | 1.943942  | -0.666097 | C  | -1.810276 | 0.596182  | 0.810719  |
| C  | 1.687623  | -2.906819 | 0.397050  | H  | 0.185021  | 1.119221  | 1.431399  |
| C  | 2.103227  | 2.493857  | -1.892412 | C  | -2.574240 | -0.124643 | -0.122417 |
| H  | 0.682724  | -2.509882 | 0.387336  | H  | -2.428862 | -1.387399 | -1.874248 |
| H  | 2.047551  | 1.785286  | -2.709793 | H  | -2.294153 | 1.157630  | 1.599294  |
| C  | 1.937604  | -4.239579 | 0.678703  | C  | -3.991614 | -0.141755 | -0.057876 |
| C  | 2.022318  | 3.865938  | -2.068022 | C  | -5.211186 | -0.161061 | -0.006094 |
| C  | 3.258968  | -4.692521 | 0.671178  | Cl | 2.284469  | -0.704764 | -2.743885 |
| C  | 2.113596  | 4.697486  | -0.948983 | N  | 0.233358  | -0.102027 | -0.247308 |
| H  | 3.486185  | -5.730303 | 0.885230  | Si | -7.056722 | -0.209376 | 0.050395  |
| H  | 2.055485  | 5.774203  | -1.058126 | C  | -7.507200 | -1.855366 | 0.872312  |
| C  | 4.279961  | -3.797162 | 0.386257  | H  | -7.012023 | -2.644182 | 0.282727  |
| C  | 2.279993  | 4.131471  | 0.308257  | C  | -7.650452 | -0.178169 | -1.745461 |
| H  | 5.310894  | -4.125738 | 0.375995  | H  | -8.753036 | -0.177186 | -1.728741 |
| H  | 2.352860  | 4.757825  | 1.187762  | C  | -7.668996 | 1.274565  | 1.062041  |
| C  | 3.985643  | -2.458377 | 0.110521  | H  | -7.644973 | 0.963724  | 2.119722  |
| C  | 2.356623  | 2.742882  | 0.444925  | C  | -9.131292 | 1.634582  | 0.704685  |
| C  | 2.724331  | -0.170854 | 2.719386  | H  | -9.480588 | 2.461965  | 1.337354  |
| C  | 5.290126  | 0.919849  | -0.694595 | H  | -9.204324 | 1.958312  | -0.341050 |
| C  | 2.828554  | 0.440172  | 3.968729  | H  | -9.811986 | 0.787430  | 0.848939  |
| C  | 6.666888  | 0.701731  | -0.745741 | C  | -7.174676 | -1.441776 | -2.498456 |
| H  | 2.950195  | -0.171590 | 4.857808  | H  | -7.511817 | -1.409004 | -3.543531 |
| H  | 7.335309  | 1.529557  | -0.964030 | H  | -6.078054 | -1.497440 | -2.499599 |
| C  | 2.779760  | 1.833580  | 4.090442  | H  | -7.567111 | -2.358968 | -2.042836 |
| C  | 7.197402  | -0.573079 | -0.519598 | C  | -9.030496 | -2.115211 | 0.842469  |
| C  | 2.628948  | 2.616913  | 2.952280  | H  | -9.256020 | -3.099920 | 1.274338  |
| C  | 6.341912  | -1.631640 | -0.238877 | H  | -9.564320 | -1.362649 | 1.436477  |
| C  | 2.524761  | 2.007867  | 1.693794  | H  | -9.428686 | -2.093622 | -0.179838 |
| C  | 4.957918  | -1.415025 | -0.186477 | C  | -6.775366 | 2.527086  | 0.917987  |
| C  | 2.564643  | 0.592697  | 1.552699  | H  | -7.151202 | 3.332978  | 1.563303  |
| C  | 4.401453  | -0.130056 | -0.418561 | H  | -5.736999 | 2.314393  | 1.196254  |
| H  | 1.112832  | -4.905280 | 0.897279  | H  | -6.781829 | 2.894476  | -0.115401 |
| H  | 2.861753  | 2.300557  | 5.065663  | C  | -6.982310 | -1.940158 | 2.322363  |
| H  | 2.595070  | 3.698052  | 3.047709  | H  | -7.209619 | -2.925141 | 2.752311  |
| H  | 1.892330  | 4.271606  | -3.062939 | H  | -5.896814 | -1.787848 | 2.366604  |
| H  | 8.268850  | -0.735320 | -0.562224 | H  | -7.463263 | -1.181403 | 2.953074  |
| H  | 6.755497  | -2.620294 | -0.064153 | C  | -7.170944 | 1.087379  | -2.490961 |
| H  | 2.767697  | -1.253114 | 2.651914  | H  | -7.499818 | 1.058084  | -3.538916 |
| H  | 4.904744  | 1.917749  | -0.877388 | H  | -7.568642 | 2.002434  | -2.036759 |
| C  | -0.501250 | -0.787034 | -1.162860 | H  | -6.074891 | 1.146218  | -2.481573 |
| C  | -0.428773 | 0.583051  | 0.719912  |    |           |           |           |

S<sub>0</sub> TS1

E(PBE0/LANL2DZ:3-21G\*/PCM-THF) = -2476.699450 a.u.

G(PBE0/LANL2DZ:3-21G\*/PCM-THF) = -2476.070376 a.u.

NIMAG = 1

|    |           |           |           |    |           |           |           |
|----|-----------|-----------|-----------|----|-----------|-----------|-----------|
| Ir | -2.414142 | 0.094969  | -0.210081 | C  | 1.926342  | -0.966291 | -0.487235 |
| N  | -3.018169 | 2.051242  | 0.156723  | H  | -0.027396 | -1.757332 | -0.800208 |
| N  | -2.192812 | -1.904161 | -0.511457 | C  | 1.961710  | 1.276863  | 0.338173  |
| C  | -2.315451 | 3.048078  | 0.744404  | H  | 0.046541  | 2.133833  | 0.633556  |
| C  | -2.101778 | -2.474759 | -1.739457 | C  | 2.677567  | 0.144316  | -0.074916 |
| H  | -1.354080 | 2.790323  | 1.148870  | H  | 2.418842  | -1.868611 | -0.825369 |
| H  | -2.081099 | -1.776266 | -2.567891 | H  | 2.480184  | 2.169986  | 0.661107  |
| C  | -2.788190 | 4.342827  | 0.869348  | C  | 4.095998  | 0.125921  | -0.081803 |
| C  | -2.023652 | -3.848230 | -1.896058 | C  | 5.316532  | 0.110362  | -0.090755 |
| C  | -4.054307 | 4.646070  | 0.367576  | Cl | -2.052126 | 0.713419  | -2.602554 |
| C  | -2.047322 | -4.661456 | -0.758561 | N  | -0.158199 | 0.184033  | -0.061184 |
| H  | -4.448934 | 5.653348  | 0.427616  | Si | 7.163735  | 0.078966  | -0.089922 |
| H  | -1.986991 | -5.739395 | -0.853132 | C  | 7.659336  | -1.705706 | -0.480723 |
| C  | -4.810724 | 3.624707  | -0.183440 | H  | 7.172525  | -2.339605 | 0.278494  |
| C  | -2.157699 | -4.076545 | 0.495448  | C  | 7.708094  | 0.558565  | 1.657255  |
| H  | -5.812239 | 3.818089  | -0.543733 | H  | 8.810378  | 0.588989  | 1.662041  |
| H  | -2.192333 | -4.689244 | 1.386762  | C  | 7.785734  | 1.288529  | -1.414193 |
| C  | -4.300959 | 2.324261  | -0.260727 | H  | 7.803840  | 0.728641  | -2.363930 |
| C  | -2.238923 | -2.685399 | 0.615401  | C  | 9.228714  | 1.759682  | -1.111474 |
| C  | -2.808854 | 0.234359  | 2.832066  | H  | 9.586435  | 2.415207  | -1.917189 |
| C  | -5.105565 | -1.242239 | -0.812586 | H  | 9.259981  | 2.331295  | -0.175492 |
| C  | -2.844328 | -0.356230 | 4.094778  | H  | 9.927597  | 0.919691  | -1.023006 |
| C  | -6.450084 | -1.189037 | -1.177485 | C  | 7.243931  | -0.498606 | 2.685252  |
| H  | -3.020558 | 0.260125  | 4.971492  | H  | 7.553032  | -0.203804 | 3.697432  |
| H  | -6.991785 | -2.111977 | -1.362457 | H  | 6.149371  | -0.585654 | 2.678741  |
| C  | -2.658826 | -1.735386 | 4.246153  | H  | 7.670542  | -1.486481 | 2.473367  |
| C  | -7.108650 | 0.037849  | -1.309715 | C  | 9.187212  | -1.913828 | -0.375764 |
| C  | -2.447429 | -2.525666 | 3.123078  | H  | 9.440210  | -2.968338 | -0.551568 |
| C  | -6.417606 | 1.213570  | -1.048236 | H  | 9.712294  | -1.316520 | -1.131931 |
| C  | -2.412082 | -1.936454 | 1.851454  | H  | 9.570921  | -1.632838 | 0.613255  |
| C  | -5.067960 | 1.161717  | -0.671555 | C  | 6.868166  | 2.516642  | -1.608294 |
| C  | -2.581500 | -0.534732 | 1.679781  | H  | 7.257425  | 3.151888  | -2.415765 |
| C  | -4.372375 | -0.067894 | -0.569981 | H  | 5.845298  | 2.218150  | -1.863863 |
| H  | -2.171808 | 5.091528  | 1.349372  | H  | 6.828148  | 3.122639  | -0.694899 |
| H  | -2.685352 | -2.185776 | 5.232168  | C  | 7.157095  | -2.152214 | -1.871487 |
| H  | -2.310088 | -3.596438 | 3.240313  | H  | 7.410742  | -3.206464 | -2.047459 |
| H  | -1.947411 | -4.270377 | -2.889616 | H  | 6.069466  | -2.040318 | -1.961226 |
| H  | -8.152185 | 0.071665  | -1.602589 | H  | 7.631171  | -1.557951 | -2.663331 |
| H  | -6.933383 | 2.164939  | -1.133104 | C  | 7.178229  | 1.952062  | 2.062682  |
| H  | -2.965940 | 1.304491  | 2.742971  | H  | 7.483098  | 2.189886  | 3.091139  |
| H  | -4.629440 | -2.211652 | -0.724984 | H  | 7.561730  | 2.740421  | 1.404534  |
| C  | 0.543452  | -0.908275 | -0.468024 | H  | 6.081525  | 1.971792  | 2.021143  |
| C  | 0.577281  | 1.253249  | 0.327684  |    |           |           |           |

So TS2

E(PBE0/LANL2DZ:3-21G\*/PCM-THF) = -2476.721900 a.u.

G(PBE0/LANL2DZ:3-21G\*/PCM-THF) = -2476.092205 a.u.

NIMAG = 1

|    |           |           |           |    |           |           |           |
|----|-----------|-----------|-----------|----|-----------|-----------|-----------|
| Ir | 2.404492  | -0.059883 | -0.334034 | C  | -1.906888 | -0.573358 | -1.239934 |
| N  | 2.669131  | -2.026029 | 0.133308  | H  | 0.038123  | -0.893608 | -2.138025 |
| N  | 2.277624  | 1.941487  | -0.702321 | C  | -1.801124 | 0.395112  | 0.956945  |
| C  | 1.663946  | -2.895219 | 0.391006  | H  | 0.205587  | 0.745402  | 1.657958  |
| C  | 2.111397  | 2.473917  | -1.935764 | C  | -2.581013 | -0.093562 | -0.104743 |
| H  | 0.661671  | -2.493706 | 0.350036  | H  | -2.462815 | -0.954894 | -2.086591 |
| H  | 2.058888  | 1.754087  | -2.743525 | H  | -2.272212 | 0.779100  | 1.852434  |
| C  | 1.901827  | -4.226646 | 0.689071  | C  | -3.998234 | -0.102970 | -0.034835 |
| C  | 2.025982  | 3.843335  | -2.130420 | C  | -5.217646 | -0.116186 | 0.022102  |
| C  | 3.221411  | -4.684065 | 0.720009  | Cl | 2.313595  | -0.729230 | -2.745668 |
| C  | 2.114355  | 4.690225  | -1.022977 | N  | 0.227496  | -0.089993 | -0.242195 |
| H  | 3.439062  | -5.720741 | 0.948897  | Si | -7.062455 | -0.161049 | 0.104208  |
| H  | 2.052174  | 5.765159  | -1.146565 | C  | -7.491291 | -0.737630 | 1.856098  |
| C  | 4.252880  | -3.795592 | 0.451437  | H  | -6.971646 | -1.698477 | 2.004220  |
| C  | 2.283015  | 4.141697  | 0.241866  | C  | -7.627498 | -1.432768 | -1.176777 |
| H  | 5.282272  | -4.128760 | 0.467232  | H  | -8.730077 | -1.441683 | -1.170420 |
| H  | 2.353160  | 4.780131  | 1.112847  | C  | -7.720306 | 1.584909  | -0.245359 |
| C  | 3.970590  | -2.458459 | 0.156140  | H  | -7.705209 | 2.122769  | 0.717061  |
| C  | 2.364253  | 2.755485  | 0.397402  | C  | -9.184553 | 1.543472  | -0.745320 |
| C  | 2.737153  | -0.124587 | 2.713526  | H  | -9.560556 | 2.565232  | -0.891977 |
| C  | 5.301450  | 0.898033  | -0.697015 | H  | -9.249056 | 1.021290  | -1.708084 |
| C  | 2.851682  | 0.505076  | 3.953097  | H  | -9.849174 | 1.036735  | -0.035824 |
| C  | 6.677935  | 0.673474  | -0.723515 | C  | -7.125454 | -2.845757 | -0.800381 |
| H  | 2.976979  | -0.093564 | 4.850567  | H  | -7.444143 | -3.575111 | -1.557633 |
| H  | 7.352853  | 1.493402  | -0.951428 | H  | -6.028460 | -2.863895 | -0.755324 |
| C  | 2.809049  | 1.900108  | 4.053309  | H  | -7.516776 | -3.170804 | 0.171255  |
| C  | 7.199811  | -0.597732 | -0.460007 | C  | -9.008183 | -0.978333 | 2.028586  |
| C  | 2.653165  | 2.666202  | 2.903737  | H  | -9.219506 | -1.365484 | 3.034768  |
| C  | 6.335971  | -1.646407 | -0.167784 | H  | -9.565722 | -0.040652 | 1.910248  |
| C  | 2.537332  | 2.038627  | 1.655936  | H  | -9.392085 | -1.702173 | 1.298614  |
| C  | 4.952253  | -1.423555 | -0.140271 | C  | -6.852169 | 2.381804  | -1.244970 |
| C  | 2.573099  | 0.621751  | 1.536178  | H  | -7.256461 | 3.395985  | -1.367902 |
| C  | 4.404818  | -0.141647 | -0.408961 | H  | -5.814115 | 2.460497  | -0.902874 |
| H  | 1.069329  | -4.888247 | 0.890159  | H  | -6.849816 | 1.900292  | -2.230331 |
| H  | 2.899707  | 2.382063  | 5.020450  | C  | -6.984559 | 0.251413  | 2.928732  |
| H  | 2.623684  | 3.748797  | 2.982777  | H  | -7.194128 | -0.137385 | 3.934523  |
| H  | 1.894853  | 4.234825  | -3.130866 | H  | -5.903637 | 0.418288  | 2.842971  |
| H  | 8.271094  | -0.764953 | -0.483145 | H  | -7.491900 | 1.220038  | 2.832507  |
| H  | 6.742874  | -2.632500 | 0.035024  | C  | -7.149075 | -1.068681 | -2.600079 |
| H  | 2.776128  | -1.207978 | 2.662193  | H  | -7.458498 | -1.843838 | -3.314661 |
| H  | 4.922256  | 1.892891  | -0.907539 | H  | -7.565049 | -0.111992 | -2.936992 |
| C  | -0.522877 | -0.553649 | -1.275894 | H  | -6.054025 | -0.997856 | -2.630211 |
| C  | -0.420507 | 0.381443  | 0.854784  |    |           |           |           |

T<sub>1</sub> Min1

E(PBE0/LANL2DZ:3-21G\*/PCM-THF) = -2476.626589 a.u.

G(PBE0/LANL2DZ:3-21G\*/PCM-THF) = -2476.002503 a.u.

NIMAG = 0

|    |           |           |           |    |           |           |           |
|----|-----------|-----------|-----------|----|-----------|-----------|-----------|
| Ir | 2.449568  | -0.045717 | -0.408871 | C  | -1.798588 | 0.448825  | -1.330777 |
| N  | 2.673536  | -2.038551 | -0.046322 | H  | 0.116736  | 0.840445  | -2.182725 |
| N  | 2.303487  | 1.974427  | -0.702834 | C  | -1.728251 | -0.582458 | 0.872155  |
| C  | 1.651938  | -2.924469 | -0.044898 | H  | 0.239321  | -0.877015 | 1.642842  |
| C  | 2.284397  | 2.572733  | -1.915400 | C  | -2.537055 | -0.089903 | -0.215059 |
| H  | 0.665290  | -2.514628 | -0.209443 | H  | -2.335882 | 0.848149  | -2.183417 |
| H  | 2.392861  | 1.912314  | -2.766319 | H  | -2.211092 | -0.971228 | 1.761590  |
| C  | 1.868333  | -4.277462 | 0.161927  | C  | -3.924864 | -0.116111 | -0.175727 |
| C  | 2.133117  | 3.944568  | -2.042089 | C  | -5.160699 | -0.145524 | -0.129004 |
| C  | 3.173163  | -4.730070 | 0.366415  | Cl | 2.477749  | -0.586025 | -2.773640 |
| C  | 1.991120  | 4.718519  | -0.888750 | N  | 0.334297  | -0.055695 | -0.291953 |
| H  | 3.369440  | -5.782676 | 0.532081  | Si | -6.979832 | -0.179031 | -0.057780 |
| H  | 1.864766  | 5.792241  | -0.959906 | C  | -7.607488 | -0.742341 | -1.761481 |
| C  | 4.221998  | -3.820181 | 0.343898  | H  | -7.147579 | -0.058582 | -2.494713 |
| C  | 2.017077  | 4.100478  | 0.354918  | C  | -7.618650 | 1.576757  | 0.284317  |
| H  | 5.241575  | -4.153256 | 0.484600  | H  | -8.717500 | 1.531592  | 0.364369  |
| H  | 1.913896  | 4.683195  | 1.260483  | C  | -7.523254 | -1.398682 | 1.300316  |
| C  | 3.964133  | -2.465414 | 0.125879  | H  | -7.515731 | -2.399640 | 0.836803  |
| C  | 2.179425  | 2.716741  | 0.440762  | C  | -8.960837 | -1.115168 | 1.795440  |
| C  | 2.603934  | -0.260012 | 2.636036  | H  | -9.261392 | -1.864457 | 2.541486  |
| C  | 5.355663  | 0.953522  | -0.359079 | H  | -9.016249 | -0.127976 | 2.271462  |
| C  | 2.522631  | 0.297185  | 3.911239  | H  | -9.690301 | -1.140029 | 0.977589  |
| C  | 6.725646  | 0.735738  | -0.235784 | C  | -7.249604 | 2.520816  | -0.882350 |
| H  | 2.625898  | -0.337129 | 4.785371  | H  | -7.591130 | 3.544184  | -0.671279 |
| H  | 7.417318  | 1.565288  | -0.339961 | H  | -6.160060 | 2.548475  | -1.016860 |
| C  | 2.309646  | 1.670686  | 4.071067  | H  | -7.705243 | 2.196979  | -1.826275 |
| C  | 7.218296  | -0.548569 | 0.026211  | C  | -9.141525 | -0.636118 | -1.903207 |
| C  | 2.184503  | 2.493428  | 2.955393  | H  | -9.453906 | -0.913710 | -2.919995 |
| C  | 6.340784  | -1.620478 | 0.160045  | H  | -9.642846 | -1.318798 | -1.205442 |
| C  | 2.263669  | 1.940692  | 1.672649  | H  | -9.499660 | 0.381792  | -1.703769 |
| C  | 4.964086  | -1.408040 | 0.032558  | C  | -6.559392 | -1.435288 | 2.507365  |
| C  | 2.462162  | 0.547710  | 1.501514  | H  | -6.874220 | -2.208827 | 3.222321  |
| C  | 4.450886  | -0.111359 | -0.240485 | H  | -5.532098 | -1.647361 | 2.190594  |
| H  | 1.027962  | -4.958899 | 0.158740  | H  | -6.559484 | -0.472651 | 3.033517  |
| H  | 2.246302  | 2.097824  | 5.065453  | C  | -7.142442 | -2.176558 | -2.094499 |
| H  | 2.026238  | 3.557825  | 3.092296  | H  | -7.438305 | -2.451376 | -3.116703 |
| H  | 2.123530  | 4.392037  | -3.027154 | H  | -6.052622 | -2.269379 | -2.011338 |
| H  | 8.285758  | -0.710014 | 0.126205  | H  | -7.602079 | -2.899326 | -1.407493 |
| H  | 6.735848  | -2.611136 | 0.358865  | C  | -7.051447 | 2.140600  | 1.605354  |
| H  | 2.773567  | -1.325988 | 2.526588  | H  | -7.383672 | 3.177798  | 1.756068  |
| H  | 4.988018  | 1.955313  | -0.554335 | H  | -7.376571 | 1.550737  | 2.470694  |
| C  | -0.436338 | 0.460086  | -1.333566 | H  | -5.954044 | 2.133645  | 1.578296  |
| C  | -0.368287 | -0.546204 | 0.808436  |    |           |           |           |

T<sub>1</sub> Min2

E(PBE0/LANL2DZ:3-21G\*/PCM-THF) = -2476.629057 a.u.

G(PBE0/LANL2DZ:3-21G\*/PCM-THF) = -2476.004087 a.u.

NIMAG = 0

|    |           |           |           |    |           |           |           |
|----|-----------|-----------|-----------|----|-----------|-----------|-----------|
| Ir | -2.385152 | 0.066994  | -0.337723 | C  | 1.820171  | 1.019670  | -1.018649 |
| N  | -2.626446 | 2.041035  | 0.162876  | H  | -0.111651 | 1.601171  | -1.718463 |
| N  | -2.280488 | -1.922529 | -0.758317 | C  | 1.785137  | -0.771414 | 0.642419  |
| C  | -1.609763 | 2.883767  | 0.458724  | H  | -0.165514 | -1.419290 | 1.196916  |
| C  | -2.089890 | -2.419412 | -2.003133 | C  | 2.578570  | 0.139738  | -0.155666 |
| H  | -0.616362 | 2.458915  | 0.447093  | H  | 2.346566  | 1.698690  | -1.679560 |
| H  | -2.008931 | -1.682788 | -2.791990 | H  | 2.284273  | -1.469191 | 1.304728  |
| C  | -1.834289 | 4.217017  | 0.759317  | C  | 3.960531  | 0.159014  | -0.104301 |
| C  | -2.019152 | -3.783547 | -2.230260 | C  | 5.198018  | 0.176079  | -0.053204 |
| C  | -3.144277 | 4.699842  | 0.754022  | Cl | -2.391215 | 0.775561  | -2.691582 |
| C  | -2.148187 | -4.659409 | -1.149204 | N  | -0.298525 | 0.123913  | -0.229310 |
| H  | -3.348053 | 5.739306  | 0.982109  | Si | 7.020545  | 0.205044  | 0.008903  |
| H  | -2.098821 | -5.730870 | -1.302597 | C  | 7.559308  | 2.002483  | -0.286729 |
| C  | -4.186696 | 3.832040  | 0.460523  | H  | 7.110201  | 2.302622  | -1.248178 |
| C  | -2.337542 | -4.146083 | 0.126617  | C  | 7.697784  | -0.887649 | -1.388545 |
| H  | -5.210045 | 4.182484  | 0.461317  | H  | 8.797608  | -0.897378 | -1.308814 |
| H  | -2.435145 | -4.806750 | 0.977768  | C  | 7.596197  | -0.407424 | 1.717091  |
| C  | -3.920310 | 2.492518  | 0.167023  | H  | 7.571777  | 0.470778  | 2.384129  |
| C  | -2.397707 | -2.763939 | 0.317171  | C  | 9.048320  | -0.938997 | 1.683626  |
| C  | -2.738364 | 0.075236  | 2.693060  | H  | 9.368122  | -1.234505 | 2.692826  |
| C  | -5.309234 | -0.873205 | -0.574280 | H  | 9.119613  | -1.823056 | 1.037612  |
| C  | -2.846697 | -0.577071 | 3.919267  | H  | 9.753948  | -0.187362 | 1.311071  |
| C  | -6.680219 | -0.625999 | -0.617091 | C  | 7.311200  | -0.306186 | -2.767195 |
| H  | -2.956276 | 0.002875  | 4.829834  | H  | 7.677620  | -0.956876 | -3.573758 |
| H  | -7.370205 | -1.441269 | -0.809793 | H  | 6.218976  | -0.237340 | -2.857726 |
| C  | -2.816797 | -1.975448 | 3.987986  | H  | 7.733534  | 0.694878  | -2.918303 |
| C  | -7.175283 | 0.666948  | -0.413495 | C  | 9.092315  | 2.148198  | -0.406158 |
| C  | -2.676344 | -2.726818 | 2.826857  | H  | 9.362019  | 3.187977  | -0.639162 |
| C  | -6.297244 | 1.716052  | -0.162618 | H  | 9.580849  | 1.883946  | 0.540378  |
| C  | -2.562016 | -2.078316 | 1.590953  | H  | 9.502719  | 1.505676  | -1.195464 |
| C  | -4.919318 | 1.472022  | -0.124506 | C  | 6.666150  | -1.482549 | 2.322590  |
| C  | -2.582998 | -0.660664 | 1.511713  | H  | 7.003038  | -1.750460 | 3.334045  |
| C  | -4.403199 | 0.170804  | -0.345507 | H  | 5.630842  | -1.128165 | 2.380335  |
| H  | -0.995776 | 4.859238  | 0.994014  | H  | 6.678424  | -2.394331 | 1.712512  |
| H  | -2.904640 | -2.473676 | 4.946772  | C  | 7.020526  | 2.950727  | 0.806265  |
| H  | -2.655743 | -3.809805 | 2.888483  | H  | 7.289435  | 3.991998  | 0.579602  |
| H  | -1.866960 | -4.149639 | -3.236988 | H  | 5.928688  | 2.884069  | 0.887114  |
| H  | -8.243134 | 0.851828  | -0.446282 | H  | 7.453561  | 2.698691  | 1.783315  |
| H  | -6.691151 | 2.713906  | -0.000305 | C  | 7.183773  | -2.339769 | -1.275477 |
| H  | -2.767210 | 1.158576  | 2.658201  | H  | 7.548527  | -2.943336 | -2.118811 |
| H  | -4.944883 | -1.881892 | -0.738001 | H  | 7.517534  | -2.817716 | -0.346706 |
| C  | 0.462814  | 0.988956  | -1.034033 | H  | 6.086334  | -2.355669 | -1.294583 |
| C  | 0.428748  | -0.755022 | 0.582408  |    |           |           |           |

## S11. References

---

- S1. R. Davidson, Y.-T. Hsu, G. C. Griffiths, C. Li, D. Yufit, R. Pal and A. Beeby, *Inorg. Chem.*, 2018, **57**, 14450-14462.
- S2. T. A. Zeidan, S. V. Kovalenko, M. Manoharan, R. J. Clark, I. Ghiviriga and I. V. Alabugin, *J. Am. Chem. Soc.*, 2005, **127**, 4270-4285.
- S3. M. S. Lowry, W. R. Hudson, R. A. Pascal and S. Bernhard, *J. Am. Chem. Soc.*, 2004, **126**, 14129-14135.
- S4. O. V. Dolomanov, L. J. Bourhis, R. J. Gildea, J. A. K. Howard and H. Puschmann, *J. Appl. Cryst.*, 2009, **42**, 339-341.
- S5. G. M. Sheldrick, SHELXTL: Suite of Programs for Crystal Structure Analysis, Tammanstrasse 4: Gottingen, 1998.
- S6. G. D. Sutton, C. Jiang, G. Liu and T. S. Teets, *Dalton Trans.*, 2023, **52**, 3195-3202.
- S7. C. Jiang and T. S. Teets, *Inorg. Chem.*, 2022, **61**, 8788-8796.
- S8. C. Wohlfarth and B. Wohlfahrt, Pure Organic Liquids – C5, Landolt-Börnstein – Group IV Physical Chemistry 18B, M. D. Lechner (Ed.), Springer Materials, 2002, pp 206-254. DOI: 10.1007/10639283\_6
- S9. R. Davidson, Y.-T. Hsu, T. Batchelor, D. Yufit and A. Beeby, *Dalton Trans.*, 2016, **45**, 11496-11507.
- S10. W. H. Melhuish, *J. Phys. Chem.*, 1961, **65**, 229-235.
- S11. M. J. Frisch, G. W. Trucks, H. B. Schlegel, G. E. Scuseria, M. A. Robb, J. R. Cheeseman, G. Scalmani, V. Barone, G. A. Petersson, H. Nakatsuji, X. Li, M. Caricato, A. V. Marenich, J. Bloino, B. G. Janesko, R. Gomperts, B. Mennucci, H. P. Hratchian, J. V. Ortiz, A. F. Izmaylov, J. L. Sonnenberg, D. Williams-Young, F. Ding, F. Lipparini, F. Egidi, J. Goings, B. Peng, A. Petrone, T. Henderson, D. Ranasinghe, V. G. Zakrzewski, J. Gao, N. Rega, G. Zheng, W. Liang, M. Hada, M. Ehara, K. Toyota, R. Fukuda, J. Hasegawa, M. Ishida, T. Nakajima, Y. Honda, O. Kitao, H. Nakai, T. Vreven, K. Throssell, J. A. Montgomery, Jr., J. E. Peralta, F. Ogliaro, M. J. Bearpark, J. J. Heyd, E. N. Brothers, K. N. Kudin, V. N. Staroverov, T. A. Keith, R. Kobayashi, J. Normand, K. Raghavachari, A. P. Rendell, J. C. Burant, S. S. Iyengar, J. Tomasi, M. Cossi, J. M. Millam, M. Klene, C. Adamo, R. Cammi, J. W. Ochterski, R. L. Martin, K. Morokuma, O. Farkas, J. B. Foresman, and D. J. Fox, Gaussian 16, Revision B.01, Gaussian, Inc., Wallingford CT, 2016.

- 
- S12. a) A. D. Becke, *J. Chem. Phys.*, 1993, **98**, 5648-5652; b) C. Lee, W. Yang and R. G. Parr, *Phys. Rev. B*, 1988, **37**, 785-789.
- S13. a) T. H. Dunning Jr. and P. J. Hay in *Modern Theoretical Chemistry*, (Ed.: H. F. Schaefer III) Vol. 3, Plenum, New York, 1976; b) P. J. Hay and W. R. Wadt, *J. Chem. Phys.*, 1985, **82**, 270-283; c) W. R. Wadt and P. J. Hay, *J. Chem. Phys.*, 1985, **82**, 284-298; d) P. J. Hay and W. R. Wadt, *J. Chem. Phys.*, 1985, **82**, 299-310.
- S14. a) G. A. Petersson, M. A. Al-Laham, *J. Chem. Phys.* **1991**, *94*, 6081–6090; b) G. A. Petersson, A. Bennett, T. G. Tensfeldt, M. A. Al-Laham, W. A. Shirley, J. Mantzaris, *J. Chem. Phys.* **1988**, *89*, 2193–2218.
- S15. a) H. A. Al-Attar, G. C. Griffiths, T. N. Moore, M. Tavasli, M. A. Fox, M. R. Bryce and A. P. Monkman, *Adv. Funct. Mater.*, 2011, **21**, 2376-2382; b) M. Tavasli, T. N. Moore, Y. Zheng, M. R. Bryce, M. A. Fox, G. C. Griffiths, V. Jankus, H. A. Al-Attar and A. P. Monkman, *J. Mater. Chem.*, 2012, **22**, 6419-6428; c) Y. Zheng, A. S. Batsanov, M. A. Fox, H. A. Al-Attar, K. Abdullah, V. Jankus, M. R. Bryce, A. P. Monkman, *Angew. Chem. Int. Ed.*, 2014, **53**, 11616–11619; d) H. Benjamin, Y. Zheng, A. S. Batsanov, M. A. Fox, H. A. Al-Attar, A. P. Monkman and M. R. Bryce, *Inorg. Chem.*, 2016, **55**, 8612-8627; e) H. Benjamin, M. A. Fox, A. S. Batsanov, H. A. Al-Attar, C. Li, Z. Ren, A. P. Monkman and M. R. Bryce, *Dalton Trans.*, 2017, **46**, 10996-11007; f) A. M'hamedi, M. A. Fox, A. S. Batsanov, H. A. Al-Attar, A. P. Monkman, M. R. Bryce, *J. Mater. Chem. C*, 2017, **5**, 6777–6789; g) D. G. Congrave, Y.-T. Hsu, A. S. Batsanov, A. Beeby and M. R. Bryce, *Dalton Trans.*, 2018, **47**, 2086–2098; h) H. Benjamin, Y. Zheng, V. N. Kozhevnikov, J. S. Siddle, L. J. O'Driscoll, M. A. Fox, A. S. Batsanov, G. C. Griffiths, F. B. Dias, A. P. Monkman and M. R. Bryce, *Dalton Trans.*, 2020, **49**, 2190-2208; i) R. M. Edkins, Y.-T. Hsu, M. A. Fox, D. Yufit, A. Beeby and R. J. Davidson, *Organometallics*, 2022, **41**, 2487-2493; j) R. Davidson, Y.-T. Hsu, M. A. Fox, J. A. Aguilar D. Yufit, and A. Beeby, *Inorg. Chem.*, 2023, **62**, 2793-2805; k) A. M'hamedi, A. S. Batsanov, M. A. Fox, J. A. Aguilar and M. R. Bryce, *Eur. J. Inorg. Chem.*, 2023, **26**, e202300423.
- S16. J. Tomasi, B. Mennucci and E. Cancès, *J. Mol. Struct. (Theochem)*, 1999, **464**, 211-226.
- S17. C. Adamo and V. Barone, *J. Chem. Phys.*, 1999, **110**, 6158-6170.
- S18. I. Soriano-Diaz, E. Ortí and A. Giussani, *Inorg. Chem.*, 2024, **63**, 16600-16604.
- S19. a) S. DiLuzio, V. Mdluli, T. U. Connell, J. Lewis, V. VanBenschoten and S. Bernhard, *J. Am. Chem. Soc.*, 2021, **143**, 1179-1194; b) P. A. Scattergood, A. M. Ranieri, L.



- 
- Charalambou, A. Comia, D. A. W. Ross, C. R. Rice, S. J. O. Hardman, J.-L. Heully, I. M. Dixon, M. Massi, F. Alary and P. I. P. Elliott, *Inorg. Chem.*, 2020, **59**, 1785-1803;
- c) P. Kumar, M. Pérez-Escribano, D. M. E. van Raamsdonk and D. Escudero, *J. Phys. Chem. A*, 2023, **127**, 7241-7255.
- S20. C. F. R. Mackenzie, S. -Y. Kwak, S. Kim and E. Zysman-Colman, *Dalton Trans.*, 2023, **52**, 4112-4121.
- S21. R. Dennington, T. Keith and J. Millam, Semichem Inc., Shawnee Mission, KS, 2019. GaussView, Version 6.
- S22. A. R. Allouche, *J. Comput. Chem.*, 2011, **32**, 174-182.
- S23. T. Lu and F. Chen, *J. Comput. Chem.*, 2012, **33**, 580-592.
